# Supplementary material for: Cellular and Genetic Determinants of the Sensitivity of Cancer to α-Particle Irradiation
Source: Oxford University Press journal article supplement (doi:10.1158/0008-5472.can-19-0859), 2019-08-06
Supplement: 00085472can190859-sup-218948_2_supp_5650034_pv4bnk.xlsx [file 00085472can190859-sup-218948_2_supp_5650034_pv4bnk.xlsx]

## Sheet: Supplementary Data 2
Supplementary Table 2. ssGSEA and survival after irradiation.
Rank	Feature	IC	5% CI	50% CI	95% CI	p-val1 (local)	p-val2 (global)	FDR1	FDR2	FDR3	FWER p-val	Bonfe p-val
1	REGULATION_OF_RAS_GTPASE_ACTIVITY	0.673	0.2394	0.643	0.8112	<0.1	5.94e-05	0.15	0.15	0.15	0.000594	0.5
2	SMID_BREAST_CANCER_RELAPSE_IN_LUNG_DN	0.663	0.3297	0.6514	0.8066	<0.1	5.94e-05	0.15	0.15	0.15	0.000594	0.5
3	ELVIDGE_HYPOXIA_BY_DMOG_DN	0.652	0.2076	0.6245	0.8258	<0.1	7.13e-05	0.15	0.15	0.15	0.000713	0.6
4	OXIDOREDUCTASE_ACTIVITY_ACTING_ON_THE_CH_NH_GROUP_OF_DONORS	0.651	0.328	0.6287	0.8355	<0.1	7.13e-05	0.15	0.15	0.15	0.000713	0.6
5	REGULATION_OF_RHO_GTPASE_ACTIVITY	0.627	-0.2866	0.5885	0.7911	<0.1	0.000166	0.28	0.28	0.28	0.00166	1
6	SMID_BREAST_CANCER_LUMINAL_B	0.612	0.283	0.5736	0.809	<0.1	0.000202	0.283	0.283	0.283	0.00202	1
7	NIKOLSKY_BREAST_CANCER_19Q13.1_AMPLICON	0.6	-0.305	0.5308	0.767	<0.1	0.000333	0.4	0.4	0.4	0.00333	1
8	ZWANG_DOWN_BY_2ND_EGF_PULSE	0.593	-0.234	0.5335	0.7577	<0.1	0.000428	0.423	0.423	0.423	0.00428	1
9	HALLMARK_PI3K_AKT_MTOR_SIGNALING	0.585	-0.4644	0.5431	0.7679	<0.1	0.000559	0.423	0.423	0.423	0.00559	1
10	HAN_JNK_SINGALING	0.584	0.2903	0.6107	0.7824	<0.1	0.000559	0.423	0.423	0.423	0.00559	1
11	YANG_BREAST_CANCER_ESR1_BULK	0.583	0.332	0.5975	0.84	<0.1	0.000582	0.423	0.423	0.423	0.00582	1
12	DOANE_BREAST_CANCER_CLASSES	0.579	0.2077	0.5797	0.7842	<0.1	0.000618	0.423	0.423	0.423	0.00618	1
13	BOYAULT_LIVER_CANCER_SUBCLASS_G12_UP	0.578	0.3065	0.5664	0.7999	<0.1	0.000654	0.423	0.423	0.423	0.00654	1
14	SMID_BREAST_CANCER_LUMINAL_B_UP	0.574	0.2775	0.5877	0.7683	<0.1	0.000749	0.431	0.431	0.431	0.00749	1
15	MCGOWAN_RSP6_TARGETS_DN	0.572	-0.2777	0.5882	0.7925	<0.1	0.000784	0.431	0.431	0.431	0.00784	1
16	ZHAN_MULTIPLE_MYELOMA_CD2	0.571	-0.3085	0.5305	0.7517	<0.1	0.00082	0.431	0.431	0.431	0.0082	1
17	MIKKELSEN_PLURIPOTENT_STATE_UP	0.568	-0.1944	0.5846	0.7879	<0.1	0.000951	0.461	0.461	0.461	0.00951	1
18	SMID_BREAST_CANCER_ERBB2_UP	0.563	-0.3726	0.5935	0.8446	<0.1	0.00115	0.461	0.461	0.461	0.0115	1
19	RACTNNRTTTNC_UNKNOWN	0.562	-0.3738	0.4912	0.7553	<0.1	0.00118	0.461	0.461	0.461	0.0118	1
20	DOANE_BREAST_CANCER_CLASSES_UP	0.561	-0.2	0.6119	0.8041	<0.1	0.00121	0.461	0.461	0.461	0.0121	1
21	MORI_PLASMA_CELL	0.559	0.2975	0.5879	0.809	<0.1	0.00126	0.461	0.461	0.461	0.0126	1
22	V$DR3_Q4	0.559	-0.199	0.5072	0.757	<0.1	0.00126	0.461	0.461	0.461	0.0126	1
23	GALLUZZI_PREVENT_MITOCHONDIAL_PERMEABILIZATION	0.558	-0.2713	0.5611	0.8015	<0.1	0.00126	0.461	0.461	0.461	0.0126	1
24	SMID_BREAST_CANCER_ERBB2	0.555	0.3295	0.5645	0.7641	<0.1	0.00133	0.467	0.467	0.467	0.0133	1
25	SMID_BREAST_CANCER_BASAL_DN	0.551	0.2665	0.5946	0.7916	<0.1	0.00151	0.507	0.507	0.507	0.0151	1
26	MATZUK_LUTEAL_GENES	0.548	-0.4561	0.5396	0.8513	<0.1	0.00163	0.507	0.507	0.507	0.0163	1
27	ACTAYRNNNCCCR_UNKNOWN	0.548	-0.3497	0.4573	0.7223	<0.1	0.00163	0.507	0.507	0.507	0.0163	1
28	SMID_BREAST_CANCER_RELAPSE_IN_BONE	0.546	0.1324	0.5595	0.7882	<0.1	0.00176	0.529	0.529	0.529	0.0176	1
29	HISTONE_MODIFICATION	0.542	-0.2301	0.5006	0.7486	<0.1	0.00194	0.539	0.539	0.539	0.0194	1
30	TOOKER_GEMCITABINE_RESISTANCE	0.541	0.1843	0.5803	0.768	<0.1	0.00201	0.539	0.539	0.539	0.0201	1
31	COVALENT_CHROMATIN_MODIFICATION	0.54	-0.2057	0.4832	0.7591	<0.1	0.0021	0.539	0.539	0.539	0.021	1
32	MIKKELSEN_IPS_LCP_WITH_H3K4ME3_AND_H3K27ME3	0.538	0.2469	0.5397	0.7253	<0.1	0.00225	0.539	0.539	0.539	0.0225	1
33	ELVIDGE_HIF1A_AND_HIF2A_TARGETS	0.536	-0.3066	0.5293	0.7522	<0.1	0.00238	0.539	0.539	0.539	0.0238	1
34	WEBER_METHYLATED_HCP_IN_FIBROBLAST_DN	0.534	-0.2754	0.5362	0.7898	<0.1	0.00245	0.539	0.539	0.539	0.0245	1
35	REACTOME_GENERIC_TRANSCRIPTION_PATHWAY	0.534	-0.2957	0.512	0.7454	<0.1	0.00248	0.539	0.539	0.539	0.0248	1
36	XU_GH1_EXOGENOUS_TARGETS	0.532	-0.1878	0.462	0.702	<0.1	0.00257	0.539	0.539	0.539	0.0257	1
37	CHIANG_LIVER_CANCER_SUBCLASS_PROLIFERATION_DN	0.531	0.2768	0.5465	0.7756	<0.1	0.00263	0.539	0.539	0.539	0.0263	1
38	SMID_BREAST_CANCER_RELAPSE_IN_BONE_UP	0.53	-0.3221	0.5881	0.778	<0.1	0.00266	0.539	0.539	0.539	0.0266	1
39	GCGCTTT,MIR-518B,MIR-518C,MIR-518D	0.53	-0.329	0.4844	0.7658	<0.1	0.00266	0.539	0.539	0.539	0.0266	1
40	REACTOME_PHOSPHOLIPID_METABOLISM	0.528	0.2227	0.557	0.7651	<0.1	0.00279	0.539	0.539	0.539	0.0279	1
41	BOYLAN_MULTIPLE_MYELOMA_C_CLUSTER	0.528	-0.3487	0.4407	0.7075	<0.1	0.00282	0.539	0.539	0.539	0.0282	1
42	MOTOR_ACTIVITY	0.528	0.2521	0.4822	0.7295	<0.1	0.00282	0.539	0.539	0.539	0.0282	1
43	RICKMAN_TUMOR_DIFFERENTIATED_WELL_VS_MODERATELY	0.526	0.1629	0.4839	0.7449	<0.1	0.00288	0.539	0.539	0.539	0.0288	1
44	V$ELK1_02	0.525	0.1973	0.4978	0.6996	<0.1	0.00295	0.539	0.539	0.539	0.0295	1
45	S_ADENOSYLMETHIONINE_DEPENDENT_METHYLTRANSFERASE_ACTIVITY	0.524	-0.3359	0.496	0.7228	<0.1	0.00304	0.539	0.539	0.539	0.0304	1
46	CHARAFE_BREAST_CANCER_LUMINAL_VS_BASAL	0.524	0.1879	0.5139	0.7716	<0.1	0.00304	0.539	0.539	0.539	0.0304	1
47	ELVIDGE_HYPOXIA_DN	0.523	0.2522	0.5315	0.7439	<0.1	0.00311	0.539	0.539	0.539	0.0311	1
48	VANTVEER_BREAST_CANCER_ESR1	0.523	0.2406	0.4975	0.7784	<0.1	0.00313	0.539	0.539	0.539	0.0313	1
49	ELVIDGE_HIF1A_AND_HIF2A_TARGETS_UP	0.522	-0.3463	0.5231	0.7652	<0.1	0.00314	0.539	0.539	0.539	0.0313	1
50	SHIPP_DLBCL_CURED_VS_FATAL_DN	0.52	0.2774	0.563	0.7391	<0.1	0.00328	0.552	0.552	0.552	0.0327	1
51	SRC_UP.V1 (20q12-q13)	0.518	-	-	-	<0.1	0.00336	0.552	0.552	0.552	0.0335	1
52	CHARAFE_BREAST_CANCER_LUMINAL_VS_BASAL_UP	0.518	-	-	-	<0.1	0.00341	0.552	0.552	0.552	0.034	1
53	NEGATIVE_REGULATION_OF_TRANSCRIPTION_FACTOR_ACTIVITY	0.515	-	-	-	<0.1	0.0036	0.572	0.572	0.572	0.0359	1
54	LIN_MELANOMA_COPY_NUMBER	0.514	-	-	-	<0.1	0.00374	0.583	0.583	0.583	0.0373	1
55	MICROBODY (2)	0.512	-	-	-	<0.1	0.00386	0.591	0.591	0.591	0.0385	1
56	V$NRF2_01	0.509	-	-	-	<0.1	0.00419	0.603	0.603	0.603	0.0418	1
57	ACCAATC,MIR-509	0.506	-	-	-	<0.1	0.00446	0.603	0.603	0.603	0.0444	1
58	SMID_BREAST_CANCER_RELAPSE_IN_BRAIN_DN	0.505	-	-	-	<0.1	0.00461	0.603	0.603	0.603	0.046	1
59	NADERI_BREAST_CANCER_PROGNOSIS_UP	0.503	-	-	-	<0.1	0.00481	0.603	0.603	0.603	0.0479	1
60	PHOSPHOLIPASE_A2_ACTIVITY	0.501	-	-	-	<0.1	0.00501	0.603	0.603	0.603	0.0499	1
61	REACTOME_ENDOSOMAL_SORTING_COMPLEX_REQUIRED_FOR_TRANSPORT_ESCRT	0.5	-	-	-	<0.1	0.00509	0.603	0.603	0.603	0.0505	1
62	AMINO_ACID_TRANSPORT	0.5	-	-	-	<0.1	0.00513	0.603	0.603	0.603	0.051	1
63	GGAANCGGAANY_UNKNOWN	0.499	-	-	-	<0.1	0.0052	0.603	0.603	0.603	0.0517	1
64	GOLGI_STACK	0.499	-	-	-	<0.1	0.00524	0.603	0.603	0.603	0.0519	1
65	V$DR4_Q2	0.498	-	-	-	<0.1	0.00528	0.603	0.603	0.603	0.0523	1
66	HALLMARK_PEROXISOME	0.498	-	-	-	<0.1	0.0053	0.603	0.603	0.603	0.0525	1
67	PEROXISOME_ORGANIZATION_AND_BIOGENESIS	0.498	-	-	-	<0.1	0.00534	0.603	0.603	0.603	0.0529	1
68	REACTOME_RESOLUTION_OF_AP_SITES_VIA_THE_MULTIPLE_NUCLEOTIDE_PATCH_REPLACEMENT_PATHWAY	0.497	-	-	-	<0.1	0.00538	0.603	0.603	0.603	0.0534	1
69	V$NFY_01	0.497	-	-	-	<0.1	0.00541	0.603	0.603	0.603	0.0536	1
70	REACTOME_MEMBRANE_BINDING_AND_TARGETTING_OF_GAG_PROTEINS	0.496	-	-	-	<0.1	0.00548	0.603	0.603	0.603	0.0543	1
71	REACTOME_BASE_EXCISION_REPAIR	0.496	-	-	-	<0.1	0.00555	0.603	0.603	0.603	0.055	1
72	PHESSE_TARGETS_OF_APC_AND_MBD2_DN	0.495	-	-	-	<0.1	0.00561	0.603	0.603	0.603	0.0556	1
73	WATTEL_AUTONOMOUS_THYROID_ADENOMA	0.495	-	-	-	<0.1	0.00561	0.603	0.603	0.603	0.0556	1
74	PETRETTO_HEART_MASS_QTL_CIS	0.495	-	-	-	<0.1	0.00563	0.603	0.603	0.603	0.0559	1
75	BOCHKIS_FOXA2_TARGETS	0.493	-	-	-	<0.1	0.00582	0.603	0.603	0.603	0.0575	1
76	YEGNASUBRAMANIAN_PROSTATE_CANCER	0.493	-	-	-	<0.1	0.00586	0.603	0.603	0.603	0.0579	1
77	NIKOLSKY_BREAST_CANCER_5P15_AMPLICON	0.493	-	-	-	<0.1	0.00587	0.603	0.603	0.603	0.058	1
78	GATTGGY_V$NFY_Q6_01	0.492	-	-	-	<0.1	0.00593	0.603	0.603	0.603	0.0585	1
79	AUNG_GASTRIC_CANCER	0.492	-	-	-	<0.1	0.00594	0.603	0.603	0.603	0.0586	1
80	STEGER_ADIPOGENESIS	0.492	-	-	-	<0.1	0.006	0.603	0.603	0.603	0.0592	1
81	HOLLEMAN_VINCRISTINE_RESISTANCE_B_ALL	0.491	-	-	-	<0.1	0.00604	0.603	0.603	0.603	0.0595	1
82	V$AR_Q2	0.491	-	-	-	<0.1	0.00606	0.603	0.603	0.603	0.0598	1
83	PTEN_DN.V2_DN (10q23)	0.491	-	-	-	<0.1	0.00612	0.603	0.603	0.603	0.0604	1
84	LIU_PROSTATE_CANCER_UP	0.49	-	-	-	<0.1	0.00623	0.603	0.603	0.603	0.0614	1
85	HUANG_DASATINIB_RESISTANCE_DN	0.49	-	-	-	<0.1	0.00623	0.603	0.603	0.603	0.0614	1
86	REACTOME_BASE_FREE_SUGAR_PHOSPHATE_REMOVAL_VIA_THE_SINGLE_NUCLEOTIDE_REPLACEMENT_PATHWAY	0.49	-	-	-	<0.1	0.00625	0.603	0.603	0.603	0.0617	1
87	ST_WNT_CA2_CYCLIC_GMP_PATHWAY	0.489	-	-	-	<0.1	0.00633	0.603	0.603	0.603	0.0625	1
88	SASSON_RESPONSE_TO_FORSKOLIN	0.488	-	-	-	<0.1	0.00645	0.603	0.603	0.603	0.0637	1
89	LEE_LIVER_CANCER_SURVIVAL	0.488	-	-	-	<0.1	0.00649	0.603	0.603	0.603	0.0639	1
90	XU_CREBBP_TARGETS	0.488	-	-	-	<0.1	0.00657	0.603	0.603	0.603	0.0648	1
91	SECRETORY_PATHWAY	0.488	-	-	-	<0.1	0.00662	0.603	0.603	0.603	0.0652	1
92	REACTOME_COPI_MEDIATED_TRANSPORT	0.487	-	-	-	<0.1	0.00667	0.603	0.603	0.603	0.0657	1
93	SCHLESINGER_H3K27ME3_IN_NORMAL_AND_METHYLATED_IN_CANCER	0.487	-	-	-	<0.1	0.00676	0.603	0.603	0.603	0.0667	1
94	WALLACE_PROSTATE_CANCER	0.486	-	-	-	<0.1	0.00681	0.603	0.603	0.603	0.0671	1
95	REACTOME_SYNTHESIS_OF_PIPS_AT_THE_PLASMA_MEMBRANE	0.486	-	-	-	<0.1	0.00687	0.603	0.603	0.603	0.0676	1
96	V$CETS1P54_01	0.486	-	-	-	<0.1	0.00688	0.603	0.603	0.603	0.0677	1
97	DOANE_RESPONSE_TO_ANDROGEN_UP	0.485	-	-	-	<0.1	0.00718	0.616	0.616	0.616	0.0707	1
98	V$E2F_01	0.485	-	-	-	<0.1	0.00718	0.616	0.616	0.616	0.0707	1
99	V$NFY_Q6	0.483	-	-	-	<0.1	0.00749	0.624	0.624	0.624	0.0737	1
100	PRC1_BMI_UP.V1_UP (15q26.1)	0.482	-	-	-	<0.1	0.00755	0.624	0.624	0.624	0.0743	1
101	N_METHYLTRANSFERASE_ACTIVITY	0.482	-	-	-	<0.1	0.0077	0.624	0.624	0.624	0.0758	1
102	XENOBIOTIC_METABOLIC_PROCESS	0.481	-	-	-	<0.1	0.00783	0.624	0.624	0.624	0.0771	1
103	LIN_NPAS4_TARGETS	0.481	-	-	-	0.1	0.00786	0.624	0.624	0.624	0.0774	1
104	CAGCACT,MIR-512-3P	0.481	-	-	-	<0.1	0.00789	0.624	0.624	0.624	0.0777	1
105	ROLEF_GLIS3_TARGETS	0.48	-	-	-	<0.1	0.00799	0.624	0.624	0.624	0.0787	1
106	WEBER_METHYLATED_HCP_IN_SPERM_DN	0.48	-	-	-	<0.1	0.00802	0.624	0.624	0.624	0.079	1
107	SRC_UP.V1_UP (20q12-q13)	0.48	-	-	-	<0.1	0.00802	0.624	0.624	0.624	0.079	1
108	RAMASWAMY_METASTASIS	0.48	-	-	-	<0.1	0.00803	0.624	0.624	0.624	0.0791	1
109	LIANG_HEMATOPOIESIS_STEM_CELL_NUMBER_LARGE_VS_TINY	0.48	-	-	-	<0.1	0.00808	0.624	0.624	0.624	0.0796	1
110	MIKKELSEN_NPC_ICP_WITH_H3K27ME3	0.479	-	-	-	<0.1	0.00828	0.63	0.63	0.63	0.0815	1
111	V$PPARA_02	0.479	-	-	-	<0.1	0.00833	0.63	0.63	0.63	0.0819	1
112	REACTOME_PRE_NOTCH_PROCESSING_IN_GOLGI	0.478	-	-	-	<0.1	0.00839	0.63	0.63	0.63	0.0825	1
113	FINETTI_BREAST_CANCERS_KINOME_BLUE	0.477	-	-	-	<0.1	0.00863	0.642	0.642	0.642	0.0847	1
114	DOANE_BREAST_CANCER_ESR1	0.476	-	-	-	<0.1	0.00881	0.65	0.65	0.65	0.0865	1
115	SCGGAAGY_V$ELK1_02	0.475	-	-	-	<0.1	0.00907	0.652	0.652	0.652	0.0891	1
116	BROWNE_HCMV_INFECTION_10HR	0.475	-	-	-	<0.1	0.00907	0.652	0.652	0.652	0.0891	1
117	WOO_LIVER_CANCER_RECURRENCE_DN	0.475	-	-	-	<0.1	0.00907	0.652	0.652	0.652	0.0891	1
118	RESPONSE_TO_XENOBIOTIC_STIMULUS	0.474	-	-	-	<0.1	0.00936	0.657	0.657	0.657	0.0919	1
119	MIKKELSEN_IPS_ICP_WITH_H3K27ME3	0.473	-	-	-	<0.1	0.00955	0.657	0.657	0.657	0.0936	1
120	MATZUK_FERTILIZATION	0.472	-	-	-	<0.1	0.00959	0.657	0.657	0.657	0.094	1
121	FARMER_BREAST_CANCER_CLUSTER_8	0.472	-	-	-	<0.1	0.0096	0.657	0.657	0.657	0.0941	1
122	V$HNF4_01_B	0.472	-	-	-	<0.1	0.0096	0.657	0.657	0.657	0.0941	1
123	NEBEN_AML_WITH_FLT3_OR_NRAS	0.472	-	-	-	<0.1	0.0096	0.657	0.657	0.657	0.0941	1
124	PYEON_HPV_POSITIVE_TUMORS	0.47	-	-	-	<0.1	0.01	0.66	0.66	0.66	0.0979	1
125	HOFMANN_CELL_LYMPHOMA	0.47	-	-	-	<0.1	0.0102	0.66	0.66	0.66	0.0991	1
126	HOEGERKORP_CD44_TARGETS_TEMPORAL_DN	0.469	-	-	-	0.1	0.0102	0.66	0.66	0.66	0.0991	1
127	V$DR1_Q3	0.469	-	-	-	<0.1	0.0102	0.66	0.66	0.66	0.0993	1
128	CAGCAGG,MIR-370	0.468	-	-	-	<0.1	0.0104	0.66	0.66	0.66	0.101	1
129	REACTOME_CTNNB1_PHOSPHORYLATION_CASCADE	0.468	-	-	-	<0.1	0.0104	0.66	0.66	0.66	0.101	1
130	VOLTAGE_GATED_CALCIUM_CHANNEL_ACTIVITY	0.468	-	-	-	<0.1	0.0105	0.66	0.66	0.66	0.101	1
131	CHEN_LIVER_METABOLISM_QTL_CIS	0.467	-	-	-	<0.1	0.0105	0.66	0.66	0.66	0.102	1
132	TOMLINS_PROSTATE_CANCER	0.467	-	-	-	<0.1	0.0105	0.66	0.66	0.66	0.102	1
133	V$NRF1_Q6	0.466	-	-	-	<0.1	0.0107	0.66	0.66	0.66	0.103	1
134	VANTVEER_BREAST_CANCER_ESR1_UP	0.466	-	-	-	<0.1	0.0107	0.66	0.66	0.66	0.103	1
135	REGULATION_OF_MAPKKK_CASCADE	0.466	-	-	-	<0.1	0.0107	0.66	0.66	0.66	0.103	1
136	CATION_TRANSPORT	0.465	-	-	-	<0.1	0.0109	0.66	0.66	0.66	0.105	1
137	RAMJAUN_APOPTOSIS_BY_TGFB1_VIA_MAPK1_DN	0.465	-	-	-	<0.1	0.0109	0.66	0.66	0.66	0.105	1
138	REACTOME_SPHINGOLIPID_METABOLISM	0.465	-	-	-	<0.1	0.011	0.66	0.66	0.66	0.106	1
139	CTIP_DN.V1_UP	0.465	-	-	-	<0.1	0.0111	0.66	0.66	0.66	0.107	1
140	KEGG_PEROXISOME	0.464	-	-	-	<0.1	0.0111	0.66	0.66	0.66	0.107	1
141	KRAS.AMP.LUNG_UP.V1_DN (12p12.1)	0.464	-	-	-	0.1	0.0112	0.66	0.66	0.66	0.108	1
142	TCCGTCC,MIR-184	0.464	-	-	-	<0.1	0.0113	0.66	0.66	0.66	0.109	1
143	CLASPER_LYMPHATIC_VESSELS_DURING_METASTASIS	0.462	-	-	-	<0.1	0.0117	0.66	0.66	0.66	0.113	1
144	PTEN_DN.V1 (10q23)	0.462	-	-	-	<0.1	0.0117	0.66	0.66	0.66	0.113	1
145	RICKMAN_HEAD_AND_NECK_CANCER_D	0.462	-	-	-	<0.1	0.0118	0.66	0.66	0.66	0.114	1
146	KEGG_LINOLEIC_ACID_METABOLISM	0.462	-	-	-	0.1	0.0119	0.66	0.66	0.66	0.115	1
147	SPIRA_SMOKERS_LUNG_CANCER_DN	0.461	-	-	-	<0.1	0.0119	0.66	0.66	0.66	0.115	1
148	CTIP_DN.V1	0.461	-	-	-	0.1	0.012	0.66	0.66	0.66	0.116	1
149	SECRETIN_LIKE_RECEPTOR_ACTIVITY	0.46	-	-	-	<0.1	0.0122	0.66	0.66	0.66	0.117	1
150	STARK_HYPPOCAMPUS_22Q11_DELETION_DN	0.46	-	-	-	<0.1	0.0124	0.66	0.66	0.66	0.119	1
151	PARENT_MTOR_SIGNALING_UP	0.459	-	-	-	0.1	0.0124	0.66	0.66	0.66	0.12	1
152	BRCA1_DN.V1_DN (17q21.31)	0.459	-	-	-	<0.1	0.0124	0.66	0.66	0.66	0.12	1
153	REACTOME_PI_METABOLISM	0.459	-	-	-	<0.1	0.0125	0.66	0.66	0.66	0.12	1
154	AMINO_ACID_TRANSMEMBRANE_TRANSPORTER_ACTIVITY	0.459	-	-	-	<0.1	0.0125	0.66	0.66	0.66	0.12	1
155	MICROTUBULE_MOTOR_ACTIVITY	0.458	-	-	-	0.1	0.0127	0.66	0.66	0.66	0.122	1
156	PHOSPHOINOSITIDE_METABOLIC_PROCESS	0.458	-	-	-	0.1	0.0127	0.66	0.66	0.66	0.123	1
157	RASHI_RESPONSE_TO_IONIZING_RADIATION_3	0.458	-	-	-	<0.1	0.0128	0.66	0.66	0.66	0.124	1
158	BIOCARTA_MTOR_PATHWAY	0.457	-	-	-	<0.1	0.0129	0.66	0.66	0.66	0.124	1
159	HYDROLASE_ACTIVITY_HYDROLYZING_N_GLYCOSYL_COMPOUNDS	0.457	-	-	-	<0.1	0.0129	0.66	0.66	0.66	0.124	1
160	LIU_PROSTATE_CANCER	0.457	-	-	-	<0.1	0.0129	0.66	0.66	0.66	0.124	1
161	REACTOME_ABC_FAMILY_PROTEINS_MEDIATED_TRANSPORT	0.457	-	-	-	<0.1	0.0129	0.66	0.66	0.66	0.125	1
162	INTRA_GOLGI_VESICLE_MEDIATED_TRANSPORT	0.457	-	-	-	<0.1	0.013	0.66	0.66	0.66	0.125	1
163	V$EVI1_01	0.456	-	-	-	<0.1	0.0131	0.66	0.66	0.66	0.126	1
164	SPERMATID_DEVELOPMENT	0.456	-	-	-	<0.1	0.0131	0.66	0.66	0.66	0.126	1
165	REACTOME_METABOLISM_OF_AMINO_ACIDS_AND_DERIVATIVES	0.456	-	-	-	<0.1	0.0131	0.66	0.66	0.66	0.127	1
166	V$E2F_Q2	0.456	-	-	-	<0.1	0.0132	0.66	0.66	0.66	0.127	1
167	LEE_LIVER_CANCER_SURVIVAL_UP	0.456	-	-	-	<0.1	0.0132	0.66	0.66	0.66	0.127	1
168	BRUECKNER_TARGETS_OF_MIRLET7A3	0.455	-	-	-	<0.1	0.0133	0.66	0.66	0.66	0.128	1
169	VANTVEER_BREAST_CANCER_METASTASIS_UP	0.455	-	-	-	<0.1	0.0135	0.66	0.66	0.66	0.13	1
170	LIU_SOX4_TARGETS_DN	0.454	-	-	-	<0.1	0.0135	0.66	0.66	0.66	0.13	1
171	VOLTAGE_GATED_CALCIUM_CHANNEL_COMPLEX	0.454	-	-	-	<0.1	0.0136	0.66	0.66	0.66	0.131	1
172	MCAATNNNNNGCG_UNKNOWN	0.453	-	-	-	<0.1	0.0137	0.66	0.66	0.66	0.132	1
173	RICKMAN_TUMOR_DIFFERENTIATED_WELL_VS_MODERATELY_UP	0.453	-	-	-	<0.1	0.0137	0.66	0.66	0.66	0.132	1
174	KEGG_OOCYTE_MEIOSIS	0.453	-	-	-	<0.1	0.0137	0.66	0.66	0.66	0.132	1
175	V$LXR_DR4_Q3	0.453	-	-	-	<0.1	0.0137	0.66	0.66	0.66	0.132	1
176	REGULATION_OF_SMALL_GTPASE_MEDIATED_SIGNAL_TRANSDUCTION	0.452	-	-	-	<0.1	0.0141	0.663	0.663	0.663	0.136	1
177	SPERMATID_DIFFERENTIATION	0.452	-	-	-	<0.1	0.0141	0.663	0.663	0.663	0.136	1
178	NIKOLSKY_BREAST_CANCER_20P13_AMPLICON	0.451	-	-	-	<0.1	0.0142	0.663	0.663	0.663	0.137	1
179	DUTERTRE_ESTRADIOL_RESPONSE_6HR_DN	0.451	-	-	-	<0.1	0.0142	0.663	0.663	0.663	0.137	1
180	KEGG_INOSITOL_PHOSPHATE_METABOLISM	0.451	-	-	-	<0.1	0.0143	0.663	0.663	0.663	0.137	1
181	HOFFMANN_PRE_BI_TO_LARGE_PRE_BII_LYMPHOCYTE	0.451	-	-	-	0.1	0.0143	0.663	0.663	0.663	0.138	1
182	GOLUB_ALL_VS_AML	0.451	-	-	-	<0.1	0.0143	0.663	0.663	0.663	0.138	1
183	LTE2_UP.V1	0.451	-	-	-	<0.1	0.0144	0.664	0.664	0.664	0.139	1
184	PID_P38_MKK3_6PATHWAY	0.45	-	-	-	<0.1	0.0145	0.664	0.664	0.664	0.14	1
185	LIN_MELANOMA_COPY_NUMBER_UP	0.45	-	-	-	<0.1	0.0147	0.665	0.665	0.665	0.141	1
186	DETECTION_OF_EXTERNAL_STIMULUS	0.449	-	-	-	<0.1	0.0147	0.665	0.665	0.665	0.141	1
187	LIM_MAMMARY_LUMINAL_MATURE_UP	0.449	-	-	-	<0.1	0.0149	0.665	0.665	0.665	0.143	1
188	KEGG_ALZHEIMERS_DISEASE	0.449	-	-	-	<0.1	0.0149	0.665	0.665	0.665	0.143	1
189	ADENYL_RIBONUCLEOTIDE_BINDING	0.448	-	-	-	<0.1	0.0153	0.681	0.681	0.681	0.147	1
190	PETROVA_PROX1_TARGETS	0.447	-	-	-	<0.1	0.0156	0.683	0.683	0.683	0.149	1
191	REGULATION_OF_PROTEIN_STABILITY	0.447	-	-	-	0.1	0.0157	0.683	0.683	0.683	0.15	1
192	XU_CREBBP_TARGETS_UP	0.446	-	-	-	0.1	0.0158	0.683	0.683	0.683	0.151	1
193	V$ALPHACP1_01	0.446	-	-	-	<0.1	0.0158	0.683	0.683	0.683	0.151	1
194	HOSHIDA_LIVER_CANCER_SURVIVAL_DN	0.446	-	-	-	<0.1	0.0158	0.683	0.683	0.683	0.151	1
195	GROSS_ELK3_TARGETS	0.446	-	-	-	<0.1	0.0159	0.683	0.683	0.683	0.152	1
196	ORGANIC_ACID_TRANSMEMBRANE_TRANSPORTER_ACTIVITY	0.446	-	-	-	<0.1	0.0159	0.683	0.683	0.683	0.152	1
197	TERAO_AOX4_TARGETS_HG_UP	0.444	-	-	-	<0.1	0.0164	0.697	0.697	0.697	0.156	1
198	NIKOLSKY_BREAST_CANCER_8P12_P11_AMPLICON	0.444	-	-	-	<0.1	0.0165	0.697	0.697	0.697	0.157	1
199	CARBOXYLIC_ACID_TRANSMEMBRANE_TRANSPORTER_ACTIVITY	0.444	-	-	-	<0.1	0.0165	0.697	0.697	0.697	0.157	1
200	ELLWOOD_MYC_TARGETS_DN	0.443	-	-	-	<0.1	0.0167	0.701	0.701	0.701	0.159	1
201	DETECTION_OF_ABIOTIC_STIMULUS	0.443	-	-	-	<0.1	0.0168	0.701	0.701	0.701	0.16	1
202	BERTUCCI_INVASIVE_CARCINOMA_DUCTAL_VS_LOBULAR	0.443	-	-	-	<0.1	0.0169	0.701	0.701	0.701	0.161	1
203	SABATES_COLORECTAL_ADENOMA_SIZE_DN	0.443	-	-	-	<0.1	0.0169	0.701	0.701	0.701	0.161	1
204	IIZUKA_LIVER_CANCER_PROGRESSION_G2_G3_UP	0.442	-	-	-	<0.1	0.017	0.701	0.701	0.701	0.162	1
205	SLEBOS_HEAD_AND_NECK_CANCER_WITH_HPV_UP	0.441	-	-	-	<0.1	0.0173	0.701	0.701	0.701	0.165	1
206	DOANE_BREAST_CANCER_ESR1_UP	0.441	-	-	-	<0.1	0.0173	0.701	0.701	0.701	0.165	1
207	ACTIN_FILAMENT	0.441	-	-	-	<0.1	0.0173	0.701	0.701	0.701	0.165	1
208	NICK_RESPONSE_TO_PROC_TREATMENT	0.441	-	-	-	<0.1	0.0173	0.701	0.701	0.701	0.165	1
209	KEGG_TYPE_II_DIABETES_MELLITUS	0.44	-	-	-	<0.1	0.0176	0.705	0.705	0.705	0.168	1
210	REGULATION_OF_JNK_CASCADE	0.44	-	-	-	<0.1	0.0176	0.705	0.705	0.705	0.168	1
211	SERVITJA_ISLET_HNF1A_TARGETS_DN	0.44	-	-	-	0.1	0.0177	0.705	0.705	0.705	0.168	1
212	KEGG_TERPENOID_BACKBONE_BIOSYNTHESIS	0.44	-	-	-	<0.1	0.0178	0.705	0.705	0.705	0.169	1
213	L_AMINO_ACID_TRANSMEMBRANE_TRANSPORTER_ACTIVITY	0.44	-	-	-	<0.1	0.0178	0.705	0.705	0.705	0.169	1
214	CHNG_MULTIPLE_MYELOMA_HYPERPLOID_DN	0.438	-	-	-	<0.1	0.0183	0.715	0.715	0.715	0.173	1
215	TCTGATC,MIR-383	0.438	-	-	-	<0.1	0.0183	0.715	0.715	0.715	0.174	1
216	CONDENSED_NUCLEAR_CHROMOSOME	0.438	-	-	-	<0.1	0.0184	0.716	0.716	0.716	0.175	1
217	ATP_BINDING	0.438	-	-	-	<0.1	0.0186	0.716	0.716	0.716	0.177	1
218	PYEON_HPV_POSITIVE_TUMORS_UP	0.437	-	-	-	<0.1	0.0188	0.716	0.716	0.716	0.178	1
219	BOYAULT_LIVER_CANCER_SUBCLASS_G1	0.436	-	-	-	<0.1	0.0189	0.716	0.716	0.716	0.18	1
220	NEUTRAL_AMINO_ACID_TRANSPORT	0.436	-	-	-	<0.1	0.019	0.716	0.716	0.716	0.18	1
221	YANG_BREAST_CANCER_ESR1_LASER	0.436	-	-	-	<0.1	0.019	0.716	0.716	0.716	0.181	1
222	V$ALX4_01	0.436	-	-	-	<0.1	0.019	0.716	0.716	0.716	0.181	1
223	AMYLOID_PRECURSOR_PROTEIN_METABOLIC_PROCESS	0.436	-	-	-	<0.1	0.019	0.716	0.716	0.716	0.181	1
224	DETECTION_OF_STIMULUS	0.436	-	-	-	<0.1	0.0192	0.716	0.716	0.716	0.183	1
225	REACTOME_RESOLUTION_OF_AP_SITES_VIA_THE_SINGLE_NUCLEOTIDE_REPLACEMENT_PATHWAY	0.435	-	-	-	<0.1	0.0193	0.716	0.716	0.716	0.183	1
226	HEDENFALK_BREAST_CANCER_BRACX_UP	0.435	-	-	-	<0.1	0.0193	0.716	0.716	0.716	0.183	1
227	BROWNE_HCMV_INFECTION_12HR	0.435	-	-	-	<0.1	0.0194	0.716	0.716	0.716	0.184	1
228	CHARAFE_BREAST_CANCER_LUMINAL_VS_MESENCHYMAL	0.435	-	-	-	<0.1	0.0195	0.716	0.716	0.716	0.185	1
229	MATZUK_MEIOTIC_AND_DNA_REPAIR	0.435	-	-	-	<0.1	0.0195	0.716	0.716	0.716	0.185	1
230	GLUTAMATE_RECEPTOR_ACTIVITY	0.435	-	-	-	<0.1	0.0196	0.716	0.716	0.716	0.186	1
231	LEE_EARLY_T_LYMPHOCYTE	0.434	-	-	-	<0.1	0.0198	0.716	0.716	0.716	0.188	1
232	TCTCTCC,MIR-185	0.434	-	-	-	<0.1	0.0199	0.716	0.716	0.716	0.189	1
233	ADENYL_NUCLEOTIDE_BINDING	0.434	-	-	-	<0.1	0.0199	0.716	0.716	0.716	0.189	1
234	V$MYC_Q2	0.434	-	-	-	<0.1	0.0199	0.716	0.716	0.716	0.189	1
235	SYED_ESTRADIOL_RESPONSE	0.433	-	-	-	<0.1	0.0201	0.72	0.72	0.72	0.191	1
236	NIKOLSKY_BREAST_CANCER_12Q24_AMPLICON	0.433	-	-	-	<0.1	0.0204	0.724	0.724	0.724	0.194	1
237	GARGALOVIC_RESPONSE_TO_OXIDIZED_PHOSPHOLIPIDS_RED_DN	0.432	-	-	-	<0.1	0.0205	0.724	0.724	0.724	0.195	1
238	V$STAT1_01	0.432	-	-	-	<0.1	0.0205	0.724	0.724	0.724	0.195	1
239	NADERI_BREAST_CANCER_PROGNOSIS	0.432	-	-	-	<0.1	0.0207	0.724	0.724	0.724	0.196	1
240	LOPEZ_EPITHELIOID_MESOTHELIOMA	0.432	-	-	-	<0.1	0.0208	0.724	0.724	0.724	0.197	1
241	ALCOHOL_METABOLIC_PROCESS	0.431	-	-	-	<0.1	0.0208	0.724	0.724	0.724	0.197	1
242	V$LMO2COM_01	0.431	-	-	-	<0.1	0.0209	0.724	0.724	0.724	0.198	1
243	ZHAN_MULTIPLE_MYELOMA_CD2_UP	0.431	-	-	-	<0.1	0.0209	0.724	0.724	0.724	0.198	1
244	HALLMARK_BILE_ACID_METABOLISM	0.43	-	-	-	<0.1	0.0213	0.731	0.731	0.731	0.202	1
245	LEE_LIVER_CANCER_MYC_TGFA_DN	0.43	-	-	-	<0.1	0.0214	0.731	0.731	0.731	0.202	1
246	BIOCARTA_VDR_PATHWAY	0.43	-	-	-	<0.1	0.0216	0.731	0.731	0.731	0.204	1
247	REACTOME_ALPHA_LINOLENIC_ACID_ALA_METABOLISM	0.429	-	-	-	<0.1	0.0216	0.731	0.731	0.731	0.205	1
248	REACTOME_TRANSFERRIN_ENDOCYTOSIS_AND_RECYCLING	0.429	-	-	-	<0.1	0.0217	0.731	0.731	0.731	0.205	1
249	BIOCARTA_PTEN_PATHWAY	0.429	-	-	-	<0.1	0.0219	0.731	0.731	0.731	0.207	1
250	OXIDOREDUCTASE_ACTIVITY_GO_0016705	0.429	-	-	-	<0.1	0.0219	0.731	0.731	0.731	0.207	1
251	REACTOME_INSULIN_RECEPTOR_RECYCLING	0.428	-	-	-	<0.1	0.0219	0.731	0.731	0.731	0.207	1
252	PURINE_RIBONUCLEOTIDE_BINDING	0.428	-	-	-	<0.1	0.022	0.731	0.731	0.731	0.208	1
253	DELACROIX_RAR_TARGETS	0.428	-	-	-	<0.1	0.022	0.731	0.731	0.731	0.208	1
254	WHITEHURST_PACLITAXEL_SENSITIVITY	0.428	-	-	-	<0.1	0.0221	0.732	0.732	0.732	0.209	1
255	V$STAT1_02	0.428	-	-	-	<0.1	0.0222	0.733	0.733	0.733	0.21	1
256	LIM_MAMMARY_LUMINAL_MATURE	0.427	-	-	-	<0.1	0.0225	0.74	0.74	0.74	0.212	1
257	ICHIBA_GRAFT_VERSUS_HOST_DISEASE_D7_DN	0.427	-	-	-	<0.1	0.0227	0.741	0.741	0.741	0.214	1
258	LIU_COMMON_CANCER_GENES	0.427	-	-	-	<0.1	0.0227	0.741	0.741	0.741	0.214	1
259	FARMER_BREAST_CANCER_APOCRINE_VS_BASAL	0.427	-	-	-	<0.1	0.0228	0.741	0.741	0.741	0.215	1
260	GOUYER_TATI_TARGETS	0.426	-	-	-	0.3	0.023	0.742	0.742	0.742	0.216	1
261	ORGANIC_ACID_TRANSPORT	0.426	-	-	-	0.2	0.0232	0.742	0.742	0.742	0.218	1
262	MIKKELSEN_MEF_HCP_WITH_H3_UNMETHYLATED	0.426	-	-	-	<0.1	0.0233	0.742	0.742	0.742	0.218	1
263	WALLACE_PROSTATE_CANCER_RACE_DN	0.425	-	-	-	<0.1	0.0233	0.742	0.742	0.742	0.218	1
264	COURTOIS_SENESCENCE_TRIGGERS	0.425	-	-	-	<0.1	0.0233	0.742	0.742	0.742	0.218	1
265	REACTOME_CREB_PHOSPHORYLATION_THROUGH_THE_ACTIVATION_OF_CAMKII	0.425	-	-	-	<0.1	0.0234	0.742	0.742	0.742	0.219	1
266	WANG_BARRETTS_ESOPHAGUS_AND_ESOPHAGUS_CANCER	0.425	-	-	-	0.1	0.0235	0.742	0.742	0.742	0.22	1
267	REACTOME_CLASS_C_3_METABOTROPIC_GLUTAMATE_PHEROMONE_RECEPTORS	0.425	-	-	-	<0.1	0.0235	0.742	0.742	0.742	0.22	1
268	REACTOME_IRON_UPTAKE_AND_TRANSPORT	0.423	-	-	-	0.1	0.0242	0.755	0.755	0.755	0.227	1
269	KIM_ALL_DISORDERS_CALB1_CORR	0.423	-	-	-	<0.1	0.0243	0.755	0.755	0.755	0.227	1
270	CREIGHTON_ENDOCRINE_THERAPY_RESISTANCE_5	0.423	-	-	-	<0.1	0.0243	0.755	0.755	0.755	0.228	1
271	NOUZOVA_METHYLATED_IN_APL	0.423	-	-	-	0.1	0.0243	0.755	0.755	0.755	0.228	1
272	MIKKELSEN_PLURIPOTENT_STATE	0.423	-	-	-	<0.1	0.0244	0.756	0.756	0.756	0.228	1
273	REACTOME_ION_CHANNEL_TRANSPORT	0.422	-	-	-	<0.1	0.0247	0.757	0.757	0.757	0.23	1
274	GATGKMRGCG_UNKNOWN	0.422	-	-	-	<0.1	0.0247	0.757	0.757	0.757	0.23	1
275	V$SMAD3_Q6	0.422	-	-	-	<0.1	0.0248	0.757	0.757	0.757	0.231	1
276	CARBOXYLIC_ACID_TRANSPORT	0.422	-	-	-	0.2	0.0248	0.757	0.757	0.757	0.231	1
277	KEEN_RESPONSE_TO_ROSIGLITAZONE	0.421	-	-	-	<0.1	0.0254	0.773	0.773	0.773	0.236	1
278	BEGUM_TARGETS_OF_PAX3_FOXO1_FUSION	0.42	-	-	-	<0.1	0.0256	0.775	0.775	0.775	0.238	1
279	FONTAINE_THYROID_TUMOR_UNCERTAIN_MALIGNANCY	0.419	-	-	-	<0.1	0.0263	0.781	0.781	0.781	0.243	1
280	ACETYLGLUCOSAMINYLTRANSFERASE_ACTIVITY	0.419	-	-	-	<0.1	0.0263	0.781	0.781	0.781	0.243	1
281	KHETCHOUMIAN_TRIM24_TARGETS_DN	0.419	-	-	-	<0.1	0.0264	0.781	0.781	0.781	0.244	1
282	HOFMANN_MYELODYSPLASTIC_SYNDROM_RISK_UP	0.419	-	-	-	<0.1	0.0264	0.781	0.781	0.781	0.245	1
283	SASSON_RESPONSE_TO_GONADOTROPHINS	0.418	-	-	-	<0.1	0.0265	0.781	0.781	0.781	0.245	1
284	MONOVALENT_INORGANIC_CATION_TRANSPORT	0.418	-	-	-	<0.1	0.0266	0.781	0.781	0.781	0.246	1
285	V$LEF1_Q2	0.418	-	-	-	<0.1	0.0266	0.781	0.781	0.781	0.246	1
286	YANG_BREAST_CANCER_ESR1_BULK_UP	0.418	-	-	-	<0.1	0.0267	0.781	0.781	0.781	0.246	1
287	ABBUD_LIF_SIGNALING_2	0.418	-	-	-	<0.1	0.0267	0.781	0.781	0.781	0.247	1
288	V$PR_01	0.418	-	-	-	<0.1	0.0268	0.781	0.781	0.781	0.247	1
289	LI_WILMS_TUMOR_ANAPLASTIC	0.418	-	-	-	<0.1	0.0268	0.781	0.781	0.781	0.248	1
290	TGCGCANK_UNKNOWN	0.418	-	-	-	<0.1	0.0269	0.781	0.781	0.781	0.248	1
291	MATTIOLI_MULTIPLE_MYELOMA_SUBGROUPS	0.417	-	-	-	0.1	0.027	0.781	0.781	0.781	0.249	1
292	REACTOME_VITAMIN_B5_PANTOTHENATE_METABOLISM	0.417	-	-	-	0.1	0.0271	0.781	0.781	0.781	0.25	1
293	INORGANIC_CATION_TRANSMEMBRANE_TRANSPORTER_ACTIVITY	0.417	-	-	-	<0.1	0.0274	0.786	0.786	0.786	0.252	1
294	REACTOME_GLUCURONIDATION	0.417	-	-	-	<0.1	0.0275	0.786	0.786	0.786	0.253	1
295	BIOCARTA_PS1_PATHWAY	0.416	-	-	-	<0.1	0.0276	0.786	0.786	0.786	0.253	1
296	GTTGNYNNRGNAAC_UNKNOWN	0.416	-	-	-	<0.1	0.0277	0.786	0.786	0.786	0.254	1
297	CHIANG_LIVER_CANCER_SUBCLASS_POLYSOMY7_UP	0.416	-	-	-	<0.1	0.0278	0.786	0.786	0.786	0.255	1
298	KEGG_FRUCTOSE_AND_MANNOSE_METABOLISM	0.415	-	-	-	<0.1	0.028	0.786	0.786	0.786	0.257	1
299	V$HIF1_Q5	0.415	-	-	-	<0.1	0.0282	0.786	0.786	0.786	0.258	1
300	RIGGI_EWING_SARCOMA_PROGENITOR	0.415	-	-	-	<0.1	0.0282	0.786	0.786	0.786	0.259	1
301	PID_AR_PATHWAY	0.414	-	-	-	<0.1	0.0284	0.786	0.786	0.786	0.26	1
302	REACTOME_CHOLESTEROL_BIOSYNTHESIS	0.414	-	-	-	<0.1	0.0285	0.786	0.786	0.786	0.261	1
303	GLYCOPROTEIN_BIOSYNTHETIC_PROCESS	0.414	-	-	-	<0.1	0.0285	0.786	0.786	0.786	0.262	1
304	PODAR_RESPONSE_TO_ADAPHOSTIN_DN	0.414	-	-	-	<0.1	0.0286	0.786	0.786	0.786	0.262	1
305	MCCLUNG_CREB1_TARGETS	0.414	-	-	-	0.1	0.0287	0.786	0.786	0.786	0.263	1
306	MCBRYAN_PUBERTAL_BREAST_6_7WK	0.413	-	-	-	<0.1	0.0289	0.786	0.786	0.786	0.265	1
307	RNA_EXPORT_FROM_NUCLEUS	0.413	-	-	-	<0.1	0.029	0.786	0.786	0.786	0.265	1
308	LIPID_BIOSYNTHETIC_PROCESS	0.413	-	-	-	0.1	0.0291	0.786	0.786	0.786	0.266	1
309	SHEDDEN_LUNG_CANCER_GOOD_SURVIVAL_A5	0.413	-	-	-	0.1	0.0292	0.786	0.786	0.786	0.268	1
310	STEROID_HORMONE_RECEPTOR_ACTIVITY	0.413	-	-	-	<0.1	0.0293	0.786	0.786	0.786	0.268	1
311	BIOPOLYMER_BIOSYNTHETIC_PROCESS	0.412	-	-	-	0.1	0.0294	0.786	0.786	0.786	0.269	1
312	V$OCT1_02	0.412	-	-	-	<0.1	0.0295	0.786	0.786	0.786	0.27	1
313	NRL_DN.V1_UP (14q11.1-q11.2)	0.412	-	-	-	<0.1	0.0295	0.786	0.786	0.786	0.27	1
314	KIM_GASTRIC_CANCER_CHEMOSENSITIVITY	0.412	-	-	-	<0.1	0.0295	0.786	0.786	0.786	0.27	1
315	REACTOME_CYTOSOLIC_SULFONATION_OF_SMALL_MOLECULES	0.412	-	-	-	<0.1	0.0295	0.786	0.786	0.786	0.27	1
316	V$HNF4ALPHA_Q6	0.412	-	-	-	<0.1	0.0296	0.786	0.786	0.786	0.27	1
317	MYLLYKANGAS_AMPLIFICATION_HOT_SPOT_13	0.412	-	-	-	<0.1	0.0297	0.786	0.786	0.786	0.271	1
318	CDC42_PROTEIN_SIGNAL_TRANSDUCTION (1p36.1)	0.411	-	-	-	<0.1	0.0299	0.786	0.786	0.786	0.272	1
319	REACTOME_AMINE_DERIVED_HORMONES	0.411	-	-	-	<0.1	0.03	0.786	0.786	0.786	0.274	1
320	LIGAND_DEPENDENT_NUCLEAR_RECEPTOR_ACTIVITY	0.411	-	-	-	<0.1	0.03	0.786	0.786	0.786	0.274	1
321	RYTGCNWTGGNR_UNKNOWN	0.411	-	-	-	<0.1	0.0301	0.786	0.786	0.786	0.274	1
322	REGULATION_OF_HOMEOSTATIC_PROCESS	0.411	-	-	-	<0.1	0.0302	0.786	0.786	0.786	0.275	1
323	KEGG_SELENOAMINO_ACID_METABOLISM	0.411	-	-	-	<0.1	0.0303	0.786	0.786	0.786	0.275	1
324	ELVIDGE_HIF1A_TARGETS	0.41	-	-	-	<0.1	0.0303	0.786	0.786	0.786	0.275	1
325	DOANE_RESPONSE_TO_ANDROGEN_DN	0.41	-	-	-	0.1	0.0304	0.786	0.786	0.786	0.276	1
326	KYNG_DNA_DAMAGE	0.41	-	-	-	<0.1	0.0305	0.787	0.787	0.787	0.277	1
327	IIZUKA_LIVER_CANCER_PROGRESSION_G1_G2_DN	0.41	-	-	-	<0.1	0.0307	0.788	0.788	0.788	0.279	1
328	SCHMIDT_POR_TARGETS_IN_LIMB_BUD	0.409	-	-	-	<0.1	0.0309	0.788	0.788	0.788	0.28	1
329	YANG_BREAST_CANCER_ESR1_LASER_UP	0.409	-	-	-	<0.1	0.0309	0.788	0.788	0.788	0.281	1
330	PID_HES_HEY_PATHWAY	0.409	-	-	-	<0.1	0.031	0.788	0.788	0.788	0.281	1
331	GLYCOPROTEIN_METABOLIC_PROCESS	0.409	-	-	-	<0.1	0.0311	0.788	0.788	0.788	0.281	1
332	KEGG_ABC_TRANSPORTERS	0.409	-	-	-	<0.1	0.0311	0.788	0.788	0.788	0.282	1
333	GROSS_HYPOXIA_VIA_ELK3	0.409	-	-	-	<0.1	0.0312	0.788	0.788	0.788	0.283	1
334	VANTVEER_BREAST_CANCER_METASTASIS	0.408	-	-	-	<0.1	0.0313	0.788	0.788	0.788	0.284	1
335	BROWNE_HCMV_INFECTION_8HR	0.408	-	-	-	<0.1	0.0314	0.788	0.788	0.788	0.284	1
336	ZHENG_GLIOBLASTOMA_PLASTICITY	0.408	-	-	-	<0.1	0.0315	0.788	0.788	0.788	0.285	1
337	METAL_ION_TRANSPORT	0.408	-	-	-	<0.1	0.0317	0.79	0.79	0.79	0.286	1
338	PROVENZANI_METASTASIS	0.407	-	-	-	0.1	0.0318	0.79	0.79	0.79	0.287	1
339	PURINE_NUCLEOTIDE_BINDING	0.407	-	-	-	<0.1	0.032	0.79	0.79	0.79	0.289	1
340	EXTRINSIC_TO_PLASMA_MEMBRANE	0.407	-	-	-	0.1	0.032	0.79	0.79	0.79	0.289	1
341	METABOTROPIC_GLUTAMATEGABA_B_LIKE_RECEPTOR_ACTIVITY	0.407	-	-	-	<0.1	0.0322	0.79	0.79	0.79	0.291	1
342	CAFFAREL_RESPONSE_TO_THC_8HR_5_UP	0.407	-	-	-	<0.1	0.0323	0.79	0.79	0.79	0.291	1
343	KEEN_RESPONSE_TO_ROSIGLITAZONE_UP	0.407	-	-	-	<0.1	0.0323	0.79	0.79	0.79	0.292	1
344	V$GABP_B	0.406	-	-	-	0.1	0.0324	0.79	0.79	0.79	0.292	1
345	PID_CDC42_REG_PATHWAY	0.406	-	-	-	<0.1	0.0324	0.79	0.79	0.79	0.292	1
346	GGGGCCC,MIR-296	0.406	-	-	-	0.1	0.0325	0.79	0.79	0.79	0.293	1
347	ELVIDGE_HIF1A_TARGETS_UP	0.406	-	-	-	0.1	0.0328	0.79	0.79	0.79	0.296	1
348	V$ZF5_B	0.405	-	-	-	<0.1	0.0329	0.79	0.79	0.79	0.296	1
349	CATION_TRANSPORTING_ATPASE_ACTIVITY	0.405	-	-	-	<0.1	0.0332	0.79	0.79	0.79	0.298	1
350	WILLIAMS_ESR1_TARGETS_DN	0.404	-	-	-	<0.1	0.0334	0.79	0.79	0.79	0.299	1
351	STAMBOLSKY_BOUND_BY_MUTATED_TP53	0.404	-	-	-	<0.1	0.0334	0.79	0.79	0.79	0.3	1
352	VERNELL_RETINOBLASTOMA_PATHWAY	0.404	-	-	-	<0.1	0.0334	0.79	0.79	0.79	0.3	1
353	OXIDOREDUCTASE_ACTIVITY_ACTING_ON_THE_ALDEHYDE_OR_OXO_GROUP_OF_DONORS	0.404	-	-	-	<0.1	0.0335	0.79	0.79	0.79	0.3	1
354	FARMER_BREAST_CANCER_CLUSTER_7	0.404	-	-	-	<0.1	0.0337	0.79	0.79	0.79	0.302	1
355	BRCA1_DN.V1_UP (17q21.31)	0.404	-	-	-	<0.1	0.0337	0.79	0.79	0.79	0.302	1
356	CAIRO_HEPATOBLASTOMA_DN	0.404	-	-	-	<0.1	0.0337	0.79	0.79	0.79	0.302	1
357	ESC_V6.5_UP_EARLY.V1	0.404	-	-	-	<0.1	0.0337	0.79	0.79	0.79	0.302	1
358	REACTOME_INTEGRATION_OF_ENERGY_METABOLISM	0.404	-	-	-	<0.1	0.0337	0.79	0.79	0.79	0.302	1
359	REACTOME_PROLACTIN_RECEPTOR_SIGNALING	0.404	-	-	-	0.1	0.0338	0.79	0.79	0.79	0.303	1
360	CCAWNWWNNNGGC_UNKNOWN	0.403	-	-	-	<0.1	0.0339	0.79	0.79	0.79	0.304	1
361	CHEOK_RESPONSE_TO_MERCAPTOPURINE_AND_HD_MTX	0.403	-	-	-	<0.1	0.0339	0.79	0.79	0.79	0.304	1
362	TRANSCRIPTION_COREPRESSOR_ACTIVITY	0.403	-	-	-	<0.1	0.0341	0.79	0.79	0.79	0.305	1
363	REACTOME_INCRETIN_SYNTHESIS_SECRETION_AND_INACTIVATION	0.403	-	-	-	0.1	0.0342	0.79	0.79	0.79	0.306	1
364	MONTERO_THYROID_CANCER_POOR_SURVIVAL_DN	0.403	-	-	-	<0.1	0.0342	0.79	0.79	0.79	0.306	1
365	HOLLEMAN_VINCRISTINE_RESISTANCE_ALL	0.402	-	-	-	<0.1	0.0343	0.79	0.79	0.79	0.307	1
366	NUCLEOBASENUCLEOSIDENUCLEOTIDE_AND_NUCLEIC_ACID_TRANSPORT	0.402	-	-	-	<0.1	0.0343	0.79	0.79	0.79	0.307	1
367	KRAS.AMP.LUNG_UP.V1_UP (12p12.1)	0.402	-	-	-	0.1	0.0347	0.795	0.795	0.795	0.31	1
368	CAGNWMCNNNGAC_UNKNOWN	0.402	-	-	-	<0.1	0.0348	0.796	0.796	0.796	0.311	1
369	MASSARWEH_TAMOXIFEN_RESISTANCE_UP	0.401	-	-	-	<0.1	0.0354	0.8	0.8	0.8	0.316	1
370	LIEN_BREAST_CARCINOMA_METAPLASTIC_VS_DUCTAL_DN	0.401	-	-	-	<0.1	0.0354	0.8	0.8	0.8	0.316	1
371	TGTTTGY_V$HNF3_Q6	0.4	-	-	-	<0.1	0.0354	0.8	0.8	0.8	0.316	1
372	CALCIUM_ION_TRANSMEMBRANE_TRANSPORTER_ACTIVITY	0.4	-	-	-	<0.1	0.0355	0.8	0.8	0.8	0.316	1
373	V$ETF_Q6	0.4	-	-	-	<0.1	0.0355	0.8	0.8	0.8	0.316	1
374	EXOCYTOSIS	0.4	-	-	-	<0.1	0.0357	0.801	0.801	0.801	0.318	1
375	CHANG_POU5F1_TARGETS	0.4	-	-	-	<0.1	0.0357	0.801	0.801	0.801	0.318	1
376	EMBRYO_IMPLANTATION	0.4	-	-	-	<0.1	0.0359	0.803	0.803	0.803	0.319	1
377	LUI_THYROID_CANCER_PAX8_PPARG	0.399	-	-	-	0.1	0.0365	0.81	0.81	0.81	0.324	1
378	MIKKELSEN_MEF_ICP_WITH_H3K27ME3	0.398	-	-	-	<0.1	0.0367	0.81	0.81	0.81	0.325	1
379	GGCNKCCATNK_UNKNOWN	0.398	-	-	-	<0.1	0.0368	0.81	0.81	0.81	0.327	1
380	BROWNE_HCMV_INFECTION_20HR	0.398	-	-	-	<0.1	0.0368	0.81	0.81	0.81	0.327	1
381	MIKKELSEN_MCV6_HCP_WITH_H3K27ME3	0.397	-	-	-	<0.1	0.0371	0.81	0.81	0.81	0.328	1
382	V$NRSF_01	0.397	-	-	-	<0.1	0.0371	0.81	0.81	0.81	0.328	1
383	TRANSITION_METAL_ION_TRANSPORT	0.397	-	-	-	<0.1	0.0371	0.81	0.81	0.81	0.329	1
384	V$E2F_Q3_01	0.397	-	-	-	<0.1	0.0372	0.81	0.81	0.81	0.329	1
385	TATCTGG,MIR-488	0.397	-	-	-	0.1	0.0373	0.81	0.81	0.81	0.33	1
386	V$GNCF_01	0.397	-	-	-	<0.1	0.0373	0.81	0.81	0.81	0.33	1
387	SMITH_LIVER_CANCER	0.397	-	-	-	0.1	0.0374	0.81	0.81	0.81	0.331	1
388	RUAN_RESPONSE_TO_TNF_TROGLITAZONE_DN	0.396	-	-	-	<0.1	0.0376	0.81	0.81	0.81	0.332	1
389	AGGGCAG,MIR-18A	0.396	-	-	-	<0.1	0.0377	0.81	0.81	0.81	0.333	1
390	V$SP1_Q4_01	0.396	-	-	-	<0.1	0.0377	0.81	0.81	0.81	0.333	1
391	BRUSH_BORDER	0.396	-	-	-	<0.1	0.0378	0.81	0.81	0.81	0.334	1
392	NEBEN_AML_WITH_FLT3_OR_NRAS_UP	0.396	-	-	-	<0.1	0.0379	0.81	0.81	0.81	0.335	1
393	NOUZOVA_TRETINOIN_AND_H4_ACETYLATION	0.396	-	-	-	<0.1	0.0379	0.81	0.81	0.81	0.335	1
394	CERVERA_SDHB_TARGETS_1_DN	0.395	-	-	-	0.1	0.038	0.81	0.81	0.81	0.335	1
395	KIM_PTEN_TARGETS_DN	0.395	-	-	-	<0.1	0.038	0.81	0.81	0.81	0.335	1
396	MTOR_UP.N4.V1_DN (1p36)	0.395	-	-	-	<0.1	0.0381	0.81	0.81	0.81	0.336	1
397	BIOCARTA_IGF1MTOR_PATHWAY	0.395	-	-	-	<0.1	0.0385	0.812	0.812	0.812	0.339	1
398	GCANCTGNY_V$MYOD_Q6	0.395	-	-	-	<0.1	0.0385	0.812	0.812	0.812	0.339	1
399	LAIHO_COLORECTAL_CANCER_SERRATED_DN	0.395	-	-	-	<0.1	0.0386	0.812	0.812	0.812	0.34	1
400	V$AR_03	0.395	-	-	-	<0.1	0.0387	0.812	0.812	0.812	0.34	1
401	DENDRITE	0.394	-	-	-	0.3	0.0388	0.812	0.812	0.812	0.341	1
402	BHATI_G2M_ARREST_BY_2METHOXYESTRADIOL_DN	0.394	-	-	-	<0.1	0.0389	0.812	0.812	0.812	0.342	1
403	REGULATION_OF_GTPASE_ACTIVITY	0.394	-	-	-	<0.1	0.0389	0.812	0.812	0.812	0.342	1
404	JAZAG_TGFB1_SIGNALING_VIA_SMAD4	0.394	-	-	-	<0.1	0.039	0.812	0.812	0.812	0.343	1
405	NEGATIVE_REGULATION_OF_BINDING	0.394	-	-	-	0.1	0.0392	0.815	0.815	0.815	0.344	1
406	JAERVINEN_AMPLIFIED_IN_LARYNGEAL_CANCER	0.393	-	-	-	<0.1	0.0396	0.821	0.821	0.821	0.347	1
407	V$MEIS1_01	0.392	-	-	-	<0.1	0.04	0.823	0.823	0.823	0.35	1
408	MIKKELSEN_MEF_HCP_WITH_H3K27ME3	0.392	-	-	-	<0.1	0.0402	0.823	0.823	0.823	0.351	1
409	TRANSFERASE_ACTIVITY_TRANSFERRING_ONE_CARBON_GROUPS	0.392	-	-	-	0.1	0.0402	0.823	0.823	0.823	0.351	1
410	V$TGIF_01	0.392	-	-	-	0.1	0.0403	0.823	0.823	0.823	0.352	1
411	MONOVALENT_INORGANIC_CATION_TRANSMEMBRANE_TRANSPORTER_ACTIVITY	0.392	-	-	-	0.1	0.0404	0.823	0.823	0.823	0.352	1
412	NEUROLOGICAL_SYSTEM_PROCESS	0.392	-	-	-	<0.1	0.0404	0.823	0.823	0.823	0.352	1
413	REN_ALVEOLAR_RHABDOMYOSARCOMA (1q32)	0.392	-	-	-	<0.1	0.0404	0.823	0.823	0.823	0.353	1
414	REACTOME_SPHINGOLIPID_DE_NOVO_BIOSYNTHESIS	0.391	-	-	-	<0.1	0.0405	0.824	0.824	0.824	0.354	1
415	SETLUR_PROSTATE_CANCER_TMPRSS2_ERG_FUSION_DN	0.391	-	-	-	0.1	0.0408	0.827	0.827	0.827	0.355	1
416	V$USF_Q6_01	0.39	-	-	-	0.1	0.0412	0.827	0.827	0.827	0.358	1
417	ION_TRANSPORT	0.39	-	-	-	<0.1	0.0412	0.827	0.827	0.827	0.358	1
418	V$MAZR_01	0.39	-	-	-	<0.1	0.0412	0.827	0.827	0.827	0.359	1
419	BOYAULT_LIVER_CANCER_SUBCLASS_G12_DN	0.39	-	-	-	<0.1	0.0413	0.827	0.827	0.827	0.359	1
420	TRANSPORT	0.39	-	-	-	<0.1	0.0414	0.827	0.827	0.827	0.36	1
421	REACTOME_PLATELET_CALCIUM_HOMEOSTASIS	0.39	-	-	-	<0.1	0.0414	0.827	0.827	0.827	0.36	1
422	REACTOME_TRANSMEMBRANE_TRANSPORT_OF_SMALL_MOLECULES	0.39	-	-	-	<0.1	0.0415	0.828	0.828	0.828	0.361	1
423	REACTOME_CITRIC_ACID_CYCLE_TCA_CYCLE	0.39	-	-	-	<0.1	0.0417	0.829	0.829	0.829	0.362	1
424	AGCACTT,MIR-93,MIR-302A,MIR-302B,MIR-302C,MIR-302D,MIR-372,MIR-373,MIR-520E,MIR-520A,MIR-526B,MIR-520B,MIR-520C,MIR-520D	0.389	-	-	-	<0.1	0.0418	0.829	0.829	0.829	0.362	1
425	TURASHVILI_BREAST_CARCINOMA_DUCTAL_VS_LOBULAR_UP	0.389	-	-	-	0.1	0.0422	0.835	0.835	0.835	0.365	1
426	NEGATIVE_REGULATION_OF_DNA_BINDING	0.389	-	-	-	0.1	0.0423	0.835	0.835	0.835	0.365	1
427	RYTGCNNRGNAAC_V$MIF1_01	0.388	-	-	-	0.1	0.0426	0.838	0.838	0.838	0.367	1
428	DARWICHE_PAPILLOMA_RISK_HIGH_DN	0.388	-	-	-	<0.1	0.0426	0.838	0.838	0.838	0.368	1
429	SHI_SPARC_TARGETS	0.387	-	-	-	<0.1	0.0431	0.842	0.842	0.842	0.371	1
430	HUTTMANN_B_CLL_POOR_SURVIVAL	0.387	-	-	-	<0.1	0.0431	0.842	0.842	0.842	0.371	1
431	NEUTRAL_AMINO_ACID_TRANSMEMBRANE_TRANSPORTER_ACTIVITY	0.387	-	-	-	<0.1	0.0431	0.842	0.842	0.842	0.371	1
432	NAKAMURA_METASTASIS_MODEL	0.387	-	-	-	<0.1	0.0434	0.844	0.844	0.844	0.373	1
433	REACTOME_GABA_A_RECEPTOR_ACTIVATION	0.386	-	-	-	<0.1	0.0436	0.846	0.846	0.846	0.375	1
434	DI__TRI_VALENT_INORGANIC_CATION_TRANSMEMBRANE_TRANSPORTER_ACTIVITY	0.386	-	-	-	<0.1	0.0437	0.846	0.846	0.846	0.376	1
435	MARSON_FOXP3_TARGETS_STIMULATED	0.386	-	-	-	<0.1	0.0438	0.846	0.846	0.846	0.376	1
436	REACTOME_ACTIVATION_OF_CHAPERONES_BY_ATF6_ALPHA	0.386	-	-	-	<0.1	0.0439	0.846	0.846	0.846	0.378	1
437	ZHAN_MULTIPLE_MYELOMA	0.386	-	-	-	0.1	0.044	0.846	0.846	0.846	0.378	1
438	NIKOLSKY_BREAST_CANCER_8Q23_Q24_AMPLICON	0.386	-	-	-	<0.1	0.0441	0.846	0.846	0.846	0.378	1
439	V$AHR_Q5	0.385	-	-	-	<0.1	0.0442	0.846	0.846	0.846	0.379	1
440	NUCLEOTIDE_BINDING	0.385	-	-	-	<0.1	0.0445	0.846	0.846	0.846	0.381	1
441	PRC1_BMI_UP.V1 (15q26.1)	0.385	-	-	-	<0.1	0.0446	0.846	0.846	0.846	0.383	1
442	REACTOME_RAS_ACTIVATION_UOPN_CA2_INFUX_THROUGH_NMDA_RECEPTOR	0.385	-	-	-	<0.1	0.0446	0.846	0.846	0.846	0.383	1
443	KEGG_OTHER_GLYCAN_DEGRADATION	0.384	-	-	-	0.1	0.0448	0.846	0.846	0.846	0.383	1
444	KEGG_NITROGEN_METABOLISM	0.384	-	-	-	<0.1	0.0448	0.846	0.846	0.846	0.384	1
445	PETRETTO_BLOOD_PRESSURE	0.384	-	-	-	0.1	0.045	0.846	0.846	0.846	0.385	1
446	V$SREBP1_01	0.384	-	-	-	0.1	0.045	0.846	0.846	0.846	0.385	1
447	V$AP2_Q6	0.384	-	-	-	<0.1	0.045	0.846	0.846	0.846	0.385	1
448	RODWELL_AGING_KIDNEY_DN	0.384	-	-	-	0.1	0.0451	0.846	0.846	0.846	0.386	1
449	KINNEY_DNMT1_METHYLATION_TARGETS	0.384	-	-	-	<0.1	0.0452	0.846	0.846	0.846	0.386	1
450	TCGA_GLIOBLASTOMA_COPY_NUMBER_UP	0.383	-	-	-	<0.1	0.0453	0.848	0.848	0.848	0.387	1
451	BRACHAT_RESPONSE_TO_CAMPTOTHECIN	0.382	-	-	-	<0.1	0.0459	0.85	0.85	0.85	0.391	1
452	REACTOME_SYNTHESIS_SECRETION_AND_INACTIVATION_OF_GLP1	0.382	-	-	-	0.1	0.046	0.85	0.85	0.85	0.392	1
453	KEGG_RENIN_ANGIOTENSIN_SYSTEM	0.382	-	-	-	0.1	0.0461	0.85	0.85	0.85	0.393	1
454	OUELLET_OVARIAN_CANCER_INVASIVE_VS_LMP	0.382	-	-	-	0.2	0.0462	0.85	0.85	0.85	0.393	1
455	V$YY1_Q6	0.382	-	-	-	<0.1	0.0463	0.85	0.85	0.85	0.394	1
456	REACTOME_PHASE_II_CONJUGATION	0.382	-	-	-	<0.1	0.0463	0.85	0.85	0.85	0.394	1
457	MOOTHA_FFA_OXYDATION	0.382	-	-	-	0.1	0.0463	0.85	0.85	0.85	0.394	1
458	TGCACGA,MIR-517A,MIR-517C	0.382	-	-	-	0.1	0.0464	0.85	0.85	0.85	0.394	1
459	CALCIUM_CHANNEL_ACTIVITY	0.382	-	-	-	<0.1	0.0465	0.85	0.85	0.85	0.395	1
460	DISTECHE_ESCAPED_FROM_X_INACTIVATION	0.381	-	-	-	0.1	0.0466	0.85	0.85	0.85	0.396	1
461	RADAEVA_RESPONSE_TO_IFNA1	0.381	-	-	-	<0.1	0.0467	0.85	0.85	0.85	0.397	1
462	WTTGKCTG_UNKNOWN	0.381	-	-	-	<0.1	0.0467	0.85	0.85	0.85	0.397	1
463	KIM_MYC_AMPLIFICATION_TARGETS_DN	0.381	-	-	-	0.1	0.0467	0.85	0.85	0.85	0.397	1
464	SHARMA_PILOCYTIC_ASTROCYTOMA_LOCATION_DN	0.381	-	-	-	<0.1	0.0473	0.856	0.856	0.856	0.4	1
465	AMINE_TRANSMEMBRANE_TRANSPORTER_ACTIVITY	0.38	-	-	-	0.1	0.0476	0.856	0.856	0.856	0.403	1
466	HOFFMANN_PRE_BI_TO_LARGE_PRE_BII_LYMPHOCYTE_UP	0.38	-	-	-	<0.1	0.0477	0.856	0.856	0.856	0.403	1
467	YANG_BREAST_CANCER_ESR1	0.38	-	-	-	0.1	0.0478	0.856	0.856	0.856	0.404	1
468	GLYCOPROTEIN_CATABOLIC_PROCESS	0.38	-	-	-	0.1	0.0478	0.856	0.856	0.856	0.404	1
469	DAZARD_UV_RESPONSE_CLUSTER_G5	0.38	-	-	-	0.2	0.0479	0.856	0.856	0.856	0.405	1
470	PID_ERA_GENOMIC_PATHWAY	0.379	-	-	-	<0.1	0.048	0.856	0.856	0.856	0.405	1
471	REACTOME_PKA_MEDIATED_PHOSPHORYLATION_OF_CREB	0.379	-	-	-	<0.1	0.048	0.856	0.856	0.856	0.406	1
472	ACTIVE_TRANSMEMBRANE_TRANSPORTER_ACTIVITY	0.379	-	-	-	<0.1	0.0481	0.856	0.856	0.856	0.406	1
473	BIOCARTA_PITX2_PATHWAY	0.379	-	-	-	<0.1	0.0482	0.856	0.856	0.856	0.406	1
474	RAMJAUN_APOPTOSIS_BY_TGFB1_VIA_MAPK1_UP	0.379	-	-	-	<0.1	0.0483	0.856	0.856	0.856	0.407	1
475	NRL_DN.V1 (14q11.1-q11.2)	0.379	-	-	-	<0.1	0.0484	0.856	0.856	0.856	0.408	1
476	FIGUEROA_AML_METHYLATION_CLUSTER_1	0.378	-	-	-	<0.1	0.0486	0.856	0.856	0.856	0.41	1
477	BIOCARTA_WNT_PATHWAY	0.378	-	-	-	<0.1	0.0487	0.856	0.856	0.856	0.41	1
478	MITOCHONDRIAL_MEMBRANE_ORGANIZATION_AND_BIOGENESIS	0.378	-	-	-	0.1	0.0489	0.856	0.856	0.856	0.411	1
479	REACTOME_XENOBIOTICS	0.378	-	-	-	0.2	0.0492	0.856	0.856	0.856	0.413	1
480	GGGNRMNNYCAT_UNKNOWN	0.378	-	-	-	<0.1	0.0493	0.856	0.856	0.856	0.414	1
481	TUBE_DEVELOPMENT	0.377	-	-	-	<0.1	0.0493	0.856	0.856	0.856	0.414	1
482	KEGG_PHOSPHATIDYLINOSITOL_SIGNALING_SYSTEM	0.377	-	-	-	<0.1	0.0494	0.856	0.856	0.856	0.415	1
483	REACTOME_LIGAND_GATED_ION_CHANNEL_TRANSPORT	0.377	-	-	-	<0.1	0.0494	0.856	0.856	0.856	0.415	1
484	FARMER_BREAST_CANCER_APOCRINE_VS_LUMINAL	0.377	-	-	-	<0.1	0.0496	0.856	0.856	0.856	0.416	1
485	BHAT_ESR1_TARGETS_VIA_AKT1_DN	0.377	-	-	-	0.1	0.0497	0.856	0.856	0.856	0.417	1
486	REACTOME_ACTIVATED_AMPK_STIMULATES_FATTY_ACID_OXIDATION_IN_MUSCLE	0.377	-	-	-	0.1	0.05	0.856	0.856	0.856	0.419	1
487	CHROMATIN_MODIFICATION	0.377	-	-	-	<0.1	0.0502	0.856	0.856	0.856	0.42	1
488	ZHAN_MULTIPLE_MYELOMA_CD1_AND_CD2	0.377	-	-	-	0.2	0.0503	0.856	0.856	0.856	0.42	1
489	V$E2F_Q3	0.376	-	-	-	<0.1	0.0503	0.856	0.856	0.856	0.421	1
490	PROTEIN_STABILIZATION	0.376	-	-	-	0.3	0.0503	0.856	0.856	0.856	0.421	1
491	MIKKELSEN_IPS_HCP_WITH_H3_UNMETHYLATED	0.376	-	-	-	<0.1	0.0504	0.856	0.856	0.856	0.421	1
492	MIKKELSEN_ES_ICP_WITH_H3K27ME3	0.376	-	-	-	<0.1	0.0504	0.856	0.856	0.856	0.422	1
493	KEGG_ALPHA_LINOLENIC_ACID_METABOLISM	0.376	-	-	-	0.2	0.0506	0.856	0.856	0.856	0.422	1
494	HSIAO_LIVER_SPECIFIC_GENES	0.376	-	-	-	0.1	0.0507	0.856	0.856	0.856	0.423	1
495	IVANOVA_HEMATOPOIESIS_STEM_CELL_SHORT_TERM	0.376	-	-	-	<0.1	0.0507	0.856	0.856	0.856	0.423	1
496	LYASE_ACTIVITY	0.376	-	-	-	0.2	0.0507	0.856	0.856	0.856	0.423	1
497	ORGANELLE_LOCALIZATION	0.375	-	-	-	<0.1	0.0511	0.856	0.856	0.856	0.425	1
498	REACTOME_GLUCONEOGENESIS	0.375	-	-	-	0.1	0.0512	0.856	0.856	0.856	0.426	1
499	CAFFAREL_RESPONSE_TO_THC_UP	0.375	-	-	-	<0.1	0.0512	0.856	0.856	0.856	0.426	1
500	MOLECULAR_ADAPTOR_ACTIVITY	0.375	-	-	-	<0.1	0.0513	0.856	0.856	0.856	0.427	1
501	SU_LIVER	0.375	-	-	-	<0.1	0.0513	0.856	0.856	0.856	0.427	1
502	NIKOLSKY_BREAST_CANCER_1Q21_AMPLICON	0.375	-	-	-	<0.1	0.0514	0.856	0.856	0.856	0.427	1
503	HALLMARK_UV_RESPONSE	0.375	-	-	-	<0.1	0.0514	0.856	0.856	0.856	0.427	1
504	V$PR_02	0.374	-	-	-	0.1	0.0516	0.856	0.856	0.856	0.429	1
505	RAY_TUMORIGENESIS_BY_ERBB2_CDC25A_DN	0.374	-	-	-	<0.1	0.0517	0.856	0.856	0.856	0.429	1
506	KEGG_NOTCH_SIGNALING_PATHWAY	0.374	-	-	-	<0.1	0.0517	0.856	0.856	0.856	0.429	1
507	PHOSPHOLIPASE_ACTIVITY	0.374	-	-	-	0.2	0.052	0.856	0.856	0.856	0.431	1
508	PLASARI_NFIC_TARGETS_BASAL	0.374	-	-	-	<0.1	0.052	0.856	0.856	0.856	0.431	1
509	SUBSTRATE_SPECIFIC_TRANSMEMBRANE_TRANSPORTER_ACTIVITY	0.374	-	-	-	<0.1	0.052	0.856	0.856	0.856	0.432	1
510	IONOTROPIC_GLUTAMATE_RECEPTOR_ACTIVITY	0.374	-	-	-	<0.1	0.0521	0.856	0.856	0.856	0.432	1
511	REACTOME_KERATAN_SULFATE_DEGRADATION	0.374	-	-	-	0.3	0.0523	0.856	0.856	0.856	0.434	1
512	BEIER_GLIOMA_STEM_CELL	0.373	-	-	-	<0.1	0.0525	0.856	0.856	0.856	0.435	1
513	KEGG_RETINOL_METABOLISM	0.373	-	-	-	<0.1	0.0526	0.856	0.856	0.856	0.436	1
514	BILANGES_RAPAMYCIN_SENSITIVE_GENES	0.373	-	-	-	<0.1	0.0527	0.856	0.856	0.856	0.437	1
515	HISTONE_DEACETYLASE_BINDING	0.373	-	-	-	<0.1	0.0528	0.856	0.856	0.856	0.438	1
516	V$RFX1_01	0.373	-	-	-	<0.1	0.0528	0.856	0.856	0.856	0.438	1
517	GAJATE_RESPONSE_TO_TRABECTEDIN_DN	0.373	-	-	-	<0.1	0.053	0.856	0.856	0.856	0.439	1
518	RICKMAN_TUMOR_DIFFERENTIATED_WELL_VS_POORLY	0.372	-	-	-	<0.1	0.0532	0.856	0.856	0.856	0.44	1
519	HASEGAWA_TUMORIGENESIS_BY_RET_C634R	0.372	-	-	-	<0.1	0.0533	0.856	0.856	0.856	0.441	1
520	REACTOME_M_G1_TRANSITION	0.372	-	-	-	0.1	0.0533	0.856	0.856	0.856	0.442	1
521	NIKOLSKY_BREAST_CANCER_11Q12_Q14_AMPLICON	0.372	-	-	-	0.1	0.0534	0.856	0.856	0.856	0.442	1
522	REACTOME_REGULATION_OF_INSULIN_SECRETION	0.372	-	-	-	<0.1	0.0534	0.856	0.856	0.856	0.442	1
523	NUMATA_CSF3_SIGNALING_VIA_STAT3	0.372	-	-	-	<0.1	0.0535	0.856	0.856	0.856	0.443	1
524	RIZ_ERYTHROID_DIFFERENTIATION_CCNE1	0.372	-	-	-	<0.1	0.0537	0.856	0.856	0.856	0.443	1
525	RODWELL_AGING_KIDNEY_NO_BLOOD_DN	0.371	-	-	-	0.1	0.0538	0.856	0.856	0.856	0.445	1
526	WANG_LMO4_TARGETS_UP	0.371	-	-	-	<0.1	0.0539	0.856	0.856	0.856	0.446	1
527	PALOMERO_GSI_SENSITIVITY_UP	0.371	-	-	-	<0.1	0.0539	0.856	0.856	0.856	0.446	1
528	REACTOME_NEURONAL_SYSTEM	0.371	-	-	-	<0.1	0.054	0.856	0.856	0.856	0.446	1
529	MASRI_RESISTANCE_TO_TAMOXIFEN_AND_AROMATASE_INHIBITORS	0.371	-	-	-	0.1	0.054	0.856	0.856	0.856	0.446	1
530	TURASHVILI_BREAST_CARCINOMA_DUCTAL_VS_LOBULAR	0.371	-	-	-	0.2	0.0542	0.856	0.856	0.856	0.447	1
531	CARBONATE_DEHYDRATASE_ACTIVITY	0.371	-	-	-	0.1	0.0543	0.856	0.856	0.856	0.448	1
532	GGCNRNWCTTYS_UNKNOWN	0.371	-	-	-	0.2	0.0544	0.856	0.856	0.856	0.449	1
533	ESC_V6.5_UP_EARLY.V1_UP	0.371	-	-	-	<0.1	0.0545	0.856	0.856	0.856	0.449	1
534	DNA_POLYMERASE_ACTIVITY	0.37	-	-	-	<0.1	0.0545	0.856	0.856	0.856	0.449	1
535	V$OCT1_01	0.37	-	-	-	<0.1	0.0545	0.856	0.856	0.856	0.449	1
536	MEISSNER_BRAIN_ICP_WITH_H3K4ME3	0.37	-	-	-	<0.1	0.0546	0.856	0.856	0.856	0.449	1
537	REACTOME_ACTIVATION_OF_CHAPERONE_GENES_BY_ATF6_ALPHA	0.37	-	-	-	<0.1	0.0546	0.856	0.856	0.856	0.45	1
538	TGTYNNNNNRGCARM_UNKNOWN	0.37	-	-	-	0.1	0.0551	0.861	0.861	0.861	0.452	1
539	KEGG_LONG_TERM_POTENTIATION	0.37	-	-	-	<0.1	0.0552	0.861	0.861	0.861	0.453	1
540	WANG_LMO4_TARGETS	0.369	-	-	-	0.1	0.0553	0.861	0.861	0.861	0.453	1
541	WANG_BARRETTS_ESOPHAGUS_AND_ESOPHAGUS_CANCER_UP	0.369	-	-	-	<0.1	0.0553	0.861	0.861	0.861	0.453	1
542	REGULATION_OF_MEMBRANE_POTENTIAL	0.369	-	-	-	0.2	0.0554	0.861	0.861	0.861	0.454	1
543	CHARAFE_BREAST_CANCER_LUMINAL_VS_MESENCHYMAL_UP	0.369	-	-	-	<0.1	0.0556	0.861	0.861	0.861	0.455	1
544	PID_HNF3B_PATHWAY	0.368	-	-	-	0.1	0.0561	0.867	0.867	0.867	0.458	1
545	IIZUKA_LIVER_CANCER_PROGRESSION_L1_G1_DN	0.368	-	-	-	<0.1	0.0562	0.867	0.867	0.867	0.458	1
546	PROTEIN_N_TERMINUS_BINDING	0.368	-	-	-	<0.1	0.0564	0.869	0.869	0.869	0.459	1
547	LEE_LIVER_CANCER_MYC_E2F1_DN	0.368	-	-	-	0.1	0.0567	0.87	0.87	0.87	0.461	1
548	PRC2_EZH2_UP.V1	0.368	-	-	-	<0.1	0.0568	0.87	0.87	0.87	0.462	1
549	BIOCARTA_CK1_PATHWAY	0.367	-	-	-	<0.1	0.0571	0.87	0.87	0.87	0.464	1
550	ICHIBA_GRAFT_VERSUS_HOST_DISEASE_35D_DN	0.367	-	-	-	<0.1	0.0572	0.87	0.87	0.87	0.464	1
551	LANDIS_ERBB2_BREAST_TUMORS_65_UP	0.367	-	-	-	0.3	0.0572	0.87	0.87	0.87	0.464	1
552	PEART_HDAC_PROLIFERATION_CLUSTER	0.367	-	-	-	<0.1	0.0572	0.87	0.87	0.87	0.464	1
553	COFACTOR_TRANSPORTER_ACTIVITY	0.367	-	-	-	<0.1	0.0572	0.87	0.87	0.87	0.464	1
554	MASSARWEH_TAMOXIFEN_RESISTANCE	0.367	-	-	-	0.1	0.0574	0.87	0.87	0.87	0.465	1
555	NAKAMURA_ADIPOGENESIS_LATE	0.367	-	-	-	<0.1	0.0575	0.87	0.87	0.87	0.466	1
556	REACTOME_ACYL_CHAIN_REMODELLING_OF_PE	0.367	-	-	-	<0.1	0.0575	0.87	0.87	0.87	0.466	1
557	LI_CYTIDINE_ANALOGS_CYCTOTOXICITY	0.366	-	-	-	0.1	0.0577	0.871	0.871	0.871	0.467	1
558	ANION_CATION_SYMPORTER_ACTIVITY	0.366	-	-	-	<0.1	0.0581	0.872	0.872	0.872	0.469	1
559	TRANSFERASE_ACTIVITY_TRANSFERRING_HEXOSYL_GROUPS	0.366	-	-	-	<0.1	0.0582	0.872	0.872	0.872	0.47	1
560	NEGATIVE_REGULATION_OF_MYELOID_CELL_DIFFERENTIATION	0.366	-	-	-	0.1	0.0582	0.872	0.872	0.872	0.47	1
561	LIU_TARGETS_OF_VMYB_VS_CMYB	0.366	-	-	-	<0.1	0.0582	0.872	0.872	0.872	0.47	1
562	REACTOME_SYNTHESIS_OF_PE	0.366	-	-	-	0.1	0.0583	0.872	0.872	0.872	0.47	1
563	SENSORY_PERCEPTION	0.365	-	-	-	<0.1	0.0587	0.874	0.874	0.874	0.473	1
564	LEE_LIVER_CANCER_DENA_DN	0.365	-	-	-	0.1	0.0587	0.874	0.874	0.874	0.474	1
565	SMALL_GTPASE_MEDIATED_SIGNAL_TRANSDUCTION	0.365	-	-	-	<0.1	0.0587	0.874	0.874	0.874	0.474	1
566	REACTOME_PRE_NOTCH_EXPRESSION_AND_PROCESSING	0.365	-	-	-	<0.1	0.0594	0.874	0.874	0.874	0.478	1
567	RIGGINS_TAMOXIFEN_RESISTANCE_UP	0.365	-	-	-	0.1	0.0594	0.874	0.874	0.874	0.478	1
568	V$AP4_Q6	0.365	-	-	-	<0.1	0.0595	0.874	0.874	0.874	0.479	1
569	SCHLOSSER_MYC_TARGETS_AND_SERUM_RESPONSE	0.364	-	-	-	0.1	0.0596	0.874	0.874	0.874	0.479	1
570	VALK_AML_WITH_T_8_21_TRANSLOCATION	0.364	-	-	-	<0.1	0.0596	0.874	0.874	0.874	0.479	1
571	PKCA_DN.V1	0.364	-	-	-	<0.1	0.06	0.874	0.874	0.874	0.482	1
572	DAVICIONI_MOLECULAR_ARMS_VS_ERMS	0.364	-	-	-	0.1	0.0602	0.874	0.874	0.874	0.483	1
573	MYAATNNNNNNNGGC_UNKNOWN	0.364	-	-	-	<0.1	0.0602	0.874	0.874	0.874	0.483	1
574	V$HMX1_01	0.364	-	-	-	<0.1	0.0602	0.874	0.874	0.874	0.483	1
575	ZHENG_FOXP3_TARGETS_IN_THYMUS_DN	0.363	-	-	-	0.1	0.0605	0.874	0.874	0.874	0.485	1
576	CRX_DN.V1 (19q13.3)	0.363	-	-	-	0.1	0.0606	0.874	0.874	0.874	0.486	1
577	POTASSIUM_ION_TRANSPORT	0.363	-	-	-	<0.1	0.0606	0.874	0.874	0.874	0.486	1
578	REACTOME_AMINE_COMPOUND_SLC_TRANSPORTERS	0.363	-	-	-	<0.1	0.0607	0.874	0.874	0.874	0.486	1
579	PID_AR_TF_PATHWAY	0.363	-	-	-	0.1	0.0607	0.874	0.874	0.874	0.487	1
580	REACTOME_METABOLISM_OF_VITAMINS_AND_COFACTORS	0.363	-	-	-	0.2	0.0607	0.874	0.874	0.874	0.487	1
581	UDP_GLYCOSYLTRANSFERASE_ACTIVITY	0.363	-	-	-	0.2	0.061	0.874	0.874	0.874	0.489	1
582	KYNG_WERNER_SYNDROM_DN	0.363	-	-	-	0.1	0.0611	0.874	0.874	0.874	0.489	1
583	NIKOLSKY_MUTATED_AND_AMPLIFIED_IN_BREAST_CANCER	0.363	-	-	-	<0.1	0.0611	0.874	0.874	0.874	0.489	1
584	OSADA_ASCL1_TARGETS	0.363	-	-	-	<0.1	0.0613	0.874	0.874	0.874	0.49	1
585	TRANSMEMBRANE_TRANSPORTER_ACTIVITY	0.362	-	-	-	<0.1	0.0617	0.874	0.874	0.874	0.493	1
586	KASLER_HDAC7_TARGETS_1	0.362	-	-	-	<0.1	0.0617	0.874	0.874	0.874	0.493	1
587	V$SRY_01	0.362	-	-	-	<0.1	0.0618	0.874	0.874	0.874	0.493	1
588	JAZAG_TGFB1_SIGNALING_DN	0.362	-	-	-	<0.1	0.0618	0.874	0.874	0.874	0.494	1
589	YANG_BREAST_CANCER_ESR1_UP	0.362	-	-	-	<0.1	0.0619	0.874	0.874	0.874	0.494	1
590	POSITIVE_REGULATION_OF_SECRETION	0.362	-	-	-	<0.1	0.0619	0.874	0.874	0.874	0.494	1
591	HISTONE_METHYLTRANSFERASE_ACTIVITY	0.362	-	-	-	0.1	0.0621	0.874	0.874	0.874	0.495	1
592	DODD_NASOPHARYNGEAL_CARCINOMA	0.361	-	-	-	<0.1	0.0623	0.874	0.874	0.874	0.497	1
593	MULLIGHAN_NPM1_MUTATED_SIGNATURE_2	0.361	-	-	-	<0.1	0.0623	0.874	0.874	0.874	0.497	1
594	SECRETION	0.361	-	-	-	0.2	0.0623	0.874	0.874	0.874	0.497	1
595	RCGCANGCGY_V$NRF1_Q6	0.361	-	-	-	0.1	0.0623	0.874	0.874	0.874	0.497	1
596	MYLLYKANGAS_AMPLIFICATION_HOT_SPOT_2	0.361	-	-	-	0.2	0.0624	0.874	0.874	0.874	0.497	1
597	ESTABLISHMENT_OF_LOCALIZATION	0.361	-	-	-	<0.1	0.0624	0.874	0.874	0.874	0.498	1
598	KLEIN_PRIMARY_EFFUSION_LYMPHOMA	0.361	-	-	-	0.1	0.0625	0.874	0.874	0.874	0.499	1
599	JUBAN_TARGETS_OF_SPI1_AND_FLI1	0.361	-	-	-	0.1	0.0626	0.874	0.874	0.874	0.499	1
600	REACTOME_TRANSPORT_OF_INORGANIC_CATIONS_ANIONS_AND_AMINO_ACIDS_OLIGOPEPTIDES	0.361	-	-	-	<0.1	0.0627	0.874	0.874	0.874	0.499	1
601	V$MAZ_Q6	0.361	-	-	-	<0.1	0.0627	0.874	0.874	0.874	0.499	1
602	REACTOME_REGULATION_OF_APOPTOSIS	0.361	-	-	-	0.2	0.0628	0.874	0.874	0.874	0.5	1
603	BROWNE_HCMV_INFECTION_24HR	0.361	-	-	-	<0.1	0.0629	0.874	0.874	0.874	0.501	1
604	AMINE_TRANSPORT	0.361	-	-	-	0.1	0.0629	0.874	0.874	0.874	0.501	1
605	REACTOME_SYNTHESIS_SECRETION_AND_INACTIVATION_OF_GIP	0.361	-	-	-	0.1	0.0629	0.874	0.874	0.874	0.501	1
606	V$E2F1_Q4_01	0.361	-	-	-	<0.1	0.0629	0.874	0.874	0.874	0.501	1
607	MEISSNER_BRAIN_HCP_WITH_H3_UNMETHYLATED	0.361	-	-	-	0.1	0.0631	0.874	0.874	0.874	0.502	1
608	VANHARANTA_UTERINE_FIBROID_WITH_7Q_DELETION	0.36	-	-	-	0.1	0.0633	0.875	0.875	0.875	0.503	1
609	BARRIER_CANCER_RELAPSE_NORMAL_SAMPLE_UP	0.36	-	-	-	0.1	0.0634	0.875	0.875	0.875	0.503	1
610	REACTOME_SIGNALING_BY_WNT	0.36	-	-	-	0.1	0.0634	0.875	0.875	0.875	0.503	1
611	REACTOME_ADENYLATE_CYCLASE_ACTIVATING_PATHWAY	0.36	-	-	-	0.2	0.0635	0.875	0.875	0.875	0.504	1
612	V$LBP1_Q6	0.36	-	-	-	<0.1	0.0638	0.877	0.877	0.877	0.505	1
613	MEL18_DN.V1_DN	0.36	-	-	-	<0.1	0.0639	0.877	0.877	0.877	0.506	1
614	REACTOME_PEROXISOMAL_LIPID_METABOLISM	0.359	-	-	-	0.2	0.064	0.878	0.878	0.878	0.507	1
615	AACGGTT,MIR-451	0.359	-	-	-	0.1	0.0645	0.879	0.879	0.879	0.51	1
616	REACTOME_ACYL_CHAIN_REMODELLING_OF_PI	0.359	-	-	-	0.1	0.0646	0.879	0.879	0.879	0.511	1
617	NING_CHRONIC_OBSTRUCTIVE_PULMONARY_DISEASE	0.359	-	-	-	<0.1	0.0647	0.879	0.879	0.879	0.511	1
618	MYLLYKANGAS_AMPLIFICATION_HOT_SPOT_21	0.359	-	-	-	0.1	0.0647	0.879	0.879	0.879	0.511	1
619	REGULATION_OF_RHO_PROTEIN_SIGNAL_TRANSDUCTION	0.359	-	-	-	<0.1	0.0649	0.879	0.879	0.879	0.512	1
620	HOEGERKORP_CD44_TARGETS_DIRECT_DN	0.359	-	-	-	<0.1	0.0649	0.879	0.879	0.879	0.512	1
621	OSADA_ASCL1_TARGETS_UP	0.359	-	-	-	<0.1	0.0649	0.879	0.879	0.879	0.512	1
622	GUANYL_NUCLEOTIDE_EXCHANGE_FACTOR_ACTIVITY	0.358	-	-	-	<0.1	0.065	0.879	0.879	0.879	0.512	1
623	JAZAERI_BREAST_CANCER_BRCA1_VS_BRCA2_DN	0.358	-	-	-	0.1	0.0653	0.881	0.881	0.881	0.514	1
624	NICK_RESPONSE_TO_PROC_TREATMENT_UP	0.358	-	-	-	0.2	0.0654	0.882	0.882	0.882	0.515	1
625	MIKKELSEN_ES_ICP_WITH_H3K4ME3_AND_H3K27ME3	0.358	-	-	-	<0.1	0.0656	0.883	0.883	0.883	0.516	1
626	MOTAMED_RESPONSE_TO_ANDROGEN_UP	0.358	-	-	-	<0.1	0.0657	0.883	0.883	0.883	0.517	1
627	REACTOME_GAB1_SIGNALOSOME	0.357	-	-	-	<0.1	0.066	0.884	0.884	0.884	0.518	1
628	V$YY1_01	0.357	-	-	-	<0.1	0.0661	0.884	0.884	0.884	0.519	1
629	BOQUEST_STEM_CELL_CULTURED_VS_FRESH	0.357	-	-	-	0.1	0.0663	0.884	0.884	0.884	0.52	1
630	COFACTOR_METABOLIC_PROCESS	0.357	-	-	-	0.1	0.0663	0.884	0.884	0.884	0.52	1
631	ALONSO_METASTASIS_DN	0.357	-	-	-	<0.1	0.0664	0.884	0.884	0.884	0.52	1
632	REACTOME_TRANSMISSION_ACROSS_CHEMICAL_SYNAPSES	0.357	-	-	-	0.1	0.0667	0.884	0.884	0.884	0.522	1
633	KEGG_LYSINE_DEGRADATION	0.357	-	-	-	<0.1	0.0667	0.884	0.884	0.884	0.522	1
634	CARBOXYLESTERASE_ACTIVITY	0.357	-	-	-	0.1	0.0667	0.884	0.884	0.884	0.522	1
635	VERHAAK_AML_WITH_NPM1_MUTATED	0.356	-	-	-	0.1	0.0669	0.884	0.884	0.884	0.523	1
636	RAMASWAMY_METASTASIS_UP	0.356	-	-	-	<0.1	0.0669	0.884	0.884	0.884	0.523	1
637	RICKMAN_TUMOR_DIFFERENTIATED_WELL_VS_POORLY_UP	0.356	-	-	-	<0.1	0.067	0.884	0.884	0.884	0.523	1
638	REGULATION_OF_RAS_PROTEIN_SIGNAL_TRANSDUCTION	0.356	-	-	-	<0.1	0.0672	0.885	0.885	0.885	0.525	1
639	REACTOME_GOLGI_ASSOCIATED_VESICLE_BIOGENESIS	0.356	-	-	-	0.3	0.0674	0.885	0.885	0.885	0.526	1
640	BOYLAN_MULTIPLE_MYELOMA_D	0.356	-	-	-	<0.1	0.0676	0.885	0.885	0.885	0.526	1
641	REACTOME_NEUROTRANSMITTER_RELEASE_CYCLE	0.355	-	-	-	<0.1	0.0677	0.885	0.885	0.885	0.526	1
642	SAENZ_DETOX_PATHWAY_AND_CARCINOGENESIS_DN	0.355	-	-	-	<0.1	0.0678	0.885	0.885	0.885	0.527	1
643	REACTOME_AMINO_ACID_AND_OLIGOPEPTIDE_SLC_TRANSPORTERS	0.355	-	-	-	<0.1	0.0678	0.885	0.885	0.885	0.528	1
644	V$USF2_Q6	0.355	-	-	-	0.2	0.0681	0.885	0.885	0.885	0.529	1
645	FIGUEROA_AML_METHYLATION_CLUSTER_4	0.355	-	-	-	0.1	0.0681	0.885	0.885	0.885	0.53	1
646	REACTOME_NUCLEAR_RECEPTOR_TRANSCRIPTION_PATHWAY	0.355	-	-	-	0.1	0.0683	0.885	0.885	0.885	0.531	1
647	REACTOME_UNBLOCKING_OF_NMDA_RECEPTOR_GLUTAMATE_BINDING_AND_ACTIVATION	0.355	-	-	-	<0.1	0.0683	0.885	0.885	0.885	0.531	1
648	BREDEMEYER_RAG_SIGNALING_NOT_VIA_ATM	0.354	-	-	-	0.2	0.0684	0.885	0.885	0.885	0.532	1
649	HISTONE_ACETYLTRANSFERASE_ACTIVITY	0.354	-	-	-	<0.1	0.0685	0.885	0.885	0.885	0.532	1
650	BIOCARTA_HIF_PATHWAY	0.354	-	-	-	0.1	0.0686	0.885	0.885	0.885	0.533	1
651	WEBER_METHYLATED_HCP_IN_FIBROBLAST_UP	0.354	-	-	-	0.1	0.0687	0.885	0.885	0.885	0.533	1
652	SCHUETZ_BREAST_CANCER_DUCTAL_INVASIVE_DN	0.354	-	-	-	<0.1	0.0691	0.885	0.885	0.885	0.535	1
653	OXYGEN_BINDING	0.354	-	-	-	<0.1	0.0692	0.885	0.885	0.885	0.536	1
654	FOSTER_KDM1A_TARGETS_DN	0.354	-	-	-	0.1	0.0693	0.885	0.885	0.885	0.536	1
655	CAFFAREL_RESPONSE_TO_THC	0.353	-	-	-	<0.1	0.0693	0.885	0.885	0.885	0.536	1
656	NUTT_GBM_VS_AO_GLIOMA_DN	0.353	-	-	-	0.1	0.0694	0.885	0.885	0.885	0.536	1
657	GRUETZMANN_PANCREATIC_CANCER_DN	0.353	-	-	-	<0.1	0.0696	0.885	0.885	0.885	0.538	1
658	KOMMAGANI_TP63_GAMMA_TARGETS	0.353	-	-	-	<0.1	0.0697	0.885	0.885	0.885	0.538	1
659	MOTAMED_RESPONSE_TO_ANDROGEN	0.353	-	-	-	<0.1	0.0697	0.885	0.885	0.885	0.538	1
660	AATGGAG,MIR-136	0.353	-	-	-	<0.1	0.0698	0.885	0.885	0.885	0.539	1
661	NEUROPEPTIDE_BINDING	0.353	-	-	-	0.1	0.0699	0.885	0.885	0.885	0.539	1
662	PENG_LEUCINE_DEPRIVATION_UP	0.353	-	-	-	<0.1	0.0699	0.885	0.885	0.885	0.54	1
663	V$NKX61_01	0.353	-	-	-	<0.1	0.07	0.885	0.885	0.885	0.54	1
664	NUCLEOTIDE_SUGAR_METABOLIC_PROCESS	0.353	-	-	-	0.1	0.07	0.885	0.885	0.885	0.54	1
665	REACTOME_ASSEMBLY_OF_THE_PRE_REPLICATIVE_COMPLEX	0.353	-	-	-	0.1	0.07	0.885	0.885	0.885	0.54	1
666	YAUCH_HEDGEHOG_SIGNALING_PARACRINE_DN	0.352	-	-	-	<0.1	0.0702	0.887	0.887	0.887	0.542	1
667	STREICHER_LSM1_TARGETS	0.352	-	-	-	<0.1	0.0703	0.887	0.887	0.887	0.542	1
668	NIKOLSKY_BREAST_CANCER_7P22_AMPLICON	0.352	-	-	-	0.1	0.0705	0.888	0.888	0.888	0.543	1
669	CHIANG_LIVER_CANCER_SUBCLASS_POLYSOMY7	0.352	-	-	-	<0.1	0.0709	0.889	0.889	0.889	0.545	1
670	GROSS_HYPOXIA_VIA_HIF1A	0.352	-	-	-	0.1	0.0712	0.889	0.889	0.889	0.546	1
671	KEGG_MELANOGENESIS	0.352	-	-	-	0.1	0.0713	0.889	0.889	0.889	0.547	1
672	REACTOME_VOLTAGE_GATED_POTASSIUM_CHANNELS	0.351	-	-	-	<0.1	0.0714	0.889	0.889	0.889	0.547	1
673	REACTOME_TRANS_GOLGI_NETWORK_VESICLE_BUDDING	0.351	-	-	-	0.2	0.0714	0.889	0.889	0.889	0.547	1
674	REACTOME_SYNTHESIS_SECRETION_AND_DEACYLATION_OF_GHRELIN	0.351	-	-	-	0.1	0.0714	0.889	0.889	0.889	0.547	1
675	TRANSFERASE_ACTIVITY_TRANSFERRING_GROUPS_OTHER_THAN_AMINO_ACYL_GROUPS	0.351	-	-	-	<0.1	0.0717	0.889	0.889	0.889	0.548	1
676	BANDRES_RESPONSE_TO_CARMUSTIN_WITHOUT_MGMT_24HR_DN	0.351	-	-	-	<0.1	0.0718	0.889	0.889	0.889	0.549	1
677	REACTOME_ROLE_OF_DCC_IN_REGULATING_APOPTOSIS	0.351	-	-	-	<0.1	0.0718	0.889	0.889	0.889	0.549	1
678	HETEROPHILIC_CELL_ADHESION	0.351	-	-	-	<0.1	0.0718	0.889	0.889	0.889	0.549	1
679	YAO_TEMPORAL_RESPONSE_TO_PROGESTERONE_CLUSTER_15	0.351	-	-	-	0.1	0.0719	0.889	0.889	0.889	0.549	1
680	CATION_TRANSMEMBRANE_TRANSPORTER_ACTIVITY	0.351	-	-	-	<0.1	0.072	0.889	0.889	0.889	0.549	1
681	CELLULAR_POLYSACCHARIDE_METABOLIC_PROCESS	0.351	-	-	-	0.2	0.072	0.889	0.889	0.889	0.55	1
682	MOOTHA_TCA	0.351	-	-	-	<0.1	0.0724	0.889	0.889	0.889	0.552	1
683	KEGG_LYSOSOME	0.35	-	-	-	0.3	0.0725	0.889	0.889	0.889	0.552	1
684	AGGTGCA,MIR-500	0.35	-	-	-	<0.1	0.0726	0.889	0.889	0.889	0.553	1
685	PHOSPHOLIPASE_C_ACTIVITY	0.35	-	-	-	0.1	0.0727	0.889	0.889	0.889	0.553	1
686	HYDRO_LYASE_ACTIVITY	0.35	-	-	-	0.2	0.0729	0.889	0.889	0.889	0.555	1
687	ZHAN_MULTIPLE_MYELOMA_PR_DN	0.35	-	-	-	<0.1	0.0729	0.889	0.889	0.889	0.555	1
688	MORI_SMALL_PRE_BII_LYMPHOCYTE	0.35	-	-	-	0.1	0.073	0.889	0.889	0.889	0.555	1
689	WCAANNNYCAG_UNKNOWN	0.35	-	-	-	<0.1	0.0732	0.889	0.889	0.889	0.556	1
690	V$YY1_02	0.35	-	-	-	<0.1	0.0732	0.889	0.889	0.889	0.556	1
691	NLS_BEARING_SUBSTRATE_IMPORT_INTO_NUCLEUS	0.35	-	-	-	0.2	0.0732	0.889	0.889	0.889	0.556	1
692	V$TAXCREB_01	0.349	-	-	-	0.1	0.0734	0.889	0.889	0.889	0.557	1
693	HALLMARK_PANCREAS_BETA_CELLS	0.349	-	-	-	<0.1	0.0735	0.889	0.889	0.889	0.557	1
694	UBIQUITIN_CYCLE	0.349	-	-	-	0.1	0.0735	0.889	0.889	0.889	0.557	1
695	FONTAINE_FOLLICULAR_THYROID_ADENOMA	0.349	-	-	-	<0.1	0.0736	0.889	0.889	0.889	0.557	1
696	BIOCARTA_GLYCOLYSIS_PATHWAY	0.349	-	-	-	0.2	0.0736	0.889	0.889	0.889	0.557	1
697	KONDO_COLON_CANCER_HCP_WITH_H3K27ME3	0.349	-	-	-	<0.1	0.0736	0.889	0.889	0.889	0.558	1
698	KAMMINGA_SENESCENCE	0.349	-	-	-	0.1	0.0737	0.889	0.889	0.889	0.558	1
699	KATSANOU_ELAVL1_TARGETS	0.349	-	-	-	<0.1	0.074	0.889	0.889	0.889	0.559	1
700	RUIZ_TNC_TARGETS	0.349	-	-	-	0.1	0.074	0.889	0.889	0.889	0.559	1
701	MEISSNER_ES_ICP_WITH_H3K4ME3_AND_H3K27ME3	0.349	-	-	-	<0.1	0.0742	0.889	0.889	0.889	0.56	1
702	SMALL_GTPASE_BINDING	0.349	-	-	-	0.2	0.0742	0.889	0.889	0.889	0.56	1
703	KEGG_SPHINGOLIPID_METABOLISM	0.348	-	-	-	0.1	0.0744	0.889	0.889	0.889	0.561	1
704	V$E2F1DP1RB_01	0.348	-	-	-	<0.1	0.0744	0.889	0.889	0.889	0.561	1
705	CRX_NRL_DN.V1_DN (19q13.3)	0.348	-	-	-	0.1	0.0745	0.889	0.889	0.889	0.561	1
706	BYSTRYKH_HEMATOPOIESIS_STEM_CELL_FLI1	0.348	-	-	-	0.2	0.0745	0.889	0.889	0.889	0.562	1
707	KEGG_CYSTEINE_AND_METHIONINE_METABOLISM	0.347	-	-	-	0.1	0.0755	0.898	0.898	0.898	0.567	1
708	MEIOSIS_I	0.347	-	-	-	<0.1	0.0757	0.9	0.9	0.9	0.568	1
709	AGTTCTC,MIR-146A,MIR-146B	0.347	-	-	-	0.1	0.076	0.901	0.901	0.901	0.569	1
710	NELSON_RESPONSE_TO_ANDROGEN_DN	0.347	-	-	-	0.3	0.076	0.901	0.901	0.901	0.569	1
711	REACTOME_ACYL_CHAIN_REMODELLING_OF_PS	0.347	-	-	-	0.1	0.0764	0.903	0.903	0.903	0.571	1
712	KEGG_GNRH_SIGNALING_PATHWAY	0.346	-	-	-	<0.1	0.0767	0.903	0.903	0.903	0.572	1
713	SH3_SH2_ADAPTOR_ACTIVITY	0.346	-	-	-	<0.1	0.0767	0.903	0.903	0.903	0.572	1
714	KUUSELO_PANCREATIC_CANCER_19Q13_AMPLIFICATION	0.346	-	-	-	<0.1	0.0773	0.903	0.903	0.903	0.575	1
715	PETROVA_ENDOTHELIUM_LYMPHATIC_VS_BLOOD	0.346	-	-	-	0.1	0.0775	0.903	0.903	0.903	0.576	1
716	STAMBOLSKY_RESPONSE_TO_VITAMIN_D3_DN	0.346	-	-	-	0.1	0.0775	0.903	0.903	0.903	0.576	1
717	GOLGI_APPARATUS_PART	0.346	-	-	-	0.1	0.0776	0.903	0.903	0.903	0.576	1
718	CAFFAREL_RESPONSE_TO_THC_24HR_5_DN	0.345	-	-	-	<0.1	0.0777	0.903	0.903	0.903	0.577	1
719	NUCLEAR_MATRIX	0.345	-	-	-	0.1	0.0781	0.903	0.903	0.903	0.579	1
720	WANG_CLIM2_TARGETS	0.344	-	-	-	<0.1	0.0787	0.903	0.903	0.903	0.582	1
721	PID_HNF3A_PATHWAY	0.344	-	-	-	0.1	0.0788	0.903	0.903	0.903	0.583	1
722	STREICHER_LSM1_TARGETS_UP	0.344	-	-	-	<0.1	0.0789	0.903	0.903	0.903	0.583	1
723	SCHWAB_TARGETS_OF_BMYB_POLYMORPHIC_VARIANTS_DN	0.344	-	-	-	<0.1	0.0789	0.903	0.903	0.903	0.584	1
724	NIELSEN_GIST_AND_SYNOVIAL_SARCOMA	0.344	-	-	-	0.1	0.0789	0.903	0.903	0.903	0.584	1
725	DER_IFN_BETA_RESPONSE_DN	0.344	-	-	-	<0.1	0.079	0.903	0.903	0.903	0.584	1
726	REACTOME_ASSOCIATION_OF_TRIC_CCT_WITH_TARGET_PROTEINS_DURING_BIOSYNTHESIS	0.344	-	-	-	0.4	0.079	0.903	0.903	0.903	0.584	1
727	MAP_KINASE_ACTIVITY	0.344	-	-	-	<0.1	0.079	0.903	0.903	0.903	0.585	1
728	GTPASE_BINDING	0.344	-	-	-	0.2	0.0791	0.903	0.903	0.903	0.585	1
729	RB_DN.V1	0.344	-	-	-	0.1	0.0791	0.903	0.903	0.903	0.585	1
730	TAKEDA_TARGETS_OF_NUP98_HOXA9_FUSION_6HR	0.344	-	-	-	<0.1	0.0791	0.903	0.903	0.903	0.585	1
731	OXIDOREDUCTASE_ACTIVITY_ACTING_ON_THE_ALDEHYDE_OR_OXO_GROUP_OF_DONORSNAD_OR_NADP_AS_ACCEPTOR	0.344	-	-	-	<0.1	0.0794	0.903	0.903	0.903	0.586	1
732	WATANABE_COLON_CANCER_MSI_VS_MSS_DN	0.344	-	-	-	<0.1	0.0795	0.903	0.903	0.903	0.587	1
733	KEGG_PROPANOATE_METABOLISM	0.344	-	-	-	0.2	0.0796	0.903	0.903	0.903	0.587	1
734	LEE_CALORIE_RESTRICTION_MUSCLE_DN	0.343	-	-	-	<0.1	0.0796	0.903	0.903	0.903	0.587	1
735	VALK_AML_CLUSTER_8	0.343	-	-	-	0.2	0.0796	0.903	0.903	0.903	0.587	1
736	BIOCARTA_AKAP95_PATHWAY	0.343	-	-	-	<0.1	0.0796	0.903	0.903	0.903	0.587	1
737	PHOTOTRANSDUCTION	0.343	-	-	-	0.2	0.0798	0.903	0.903	0.903	0.588	1
738	CLAUS_PGR_POSITIVE_MENINGIOMA	0.343	-	-	-	0.1	0.0798	0.903	0.903	0.903	0.588	1
739	MYLLYKANGAS_AMPLIFICATION_HOT_SPOT_18	0.343	-	-	-	0.2	0.0799	0.903	0.903	0.903	0.589	1
740	DOANE_RESPONSE_TO_ANDROGEN	0.343	-	-	-	0.3	0.08	0.903	0.903	0.903	0.589	1
741	CELL_PROJECTION_PART	0.343	-	-	-	0.1	0.0802	0.903	0.903	0.903	0.59	1
742	HOSHIDA_LIVER_CANCER_LATE_RECURRENCE_DN	0.343	-	-	-	<0.1	0.0802	0.903	0.903	0.903	0.59	1
743	WEST_ADRENOCORTICAL_CARCINOMA_VS_ADENOMA	0.343	-	-	-	0.1	0.0803	0.903	0.903	0.903	0.591	1
744	REACTOME_TRAF3_DEPENDENT_IRF_ACTIVATION_PATHWAY	0.343	-	-	-	0.1	0.0804	0.903	0.903	0.903	0.591	1
745	GLUCOSE_METABOLIC_PROCESS	0.343	-	-	-	0.1	0.0805	0.903	0.903	0.903	0.592	1
746	REACTOME_PROCESSIVE_SYNTHESIS_ON_THE_LAGGING_STRAND	0.343	-	-	-	0.1	0.0806	0.903	0.903	0.903	0.592	1
747	HAHTOLA_MYCOSIS_FUNGOIDES_SKIN	0.342	-	-	-	<0.1	0.0808	0.903	0.903	0.903	0.593	1
748	CREIGHTON_AKT1_SIGNALING_VIA_MTOR_UP	0.342	-	-	-	<0.1	0.0809	0.903	0.903	0.903	0.594	1
749	AIYAR_COBRA1_TARGETS_DN	0.342	-	-	-	0.1	0.0809	0.903	0.903	0.903	0.594	1
750	REACTOME_PIP3_ACTIVATES_AKT_SIGNALING	0.342	-	-	-	0.1	0.081	0.903	0.903	0.903	0.594	1
751	OUYANG_PROSTATE_CANCER_MARKERS	0.342	-	-	-	0.1	0.0811	0.903	0.903	0.903	0.595	1
752	NIELSEN_GIST_AND_SYNOVIAL_SARCOMA_UP	0.342	-	-	-	0.1	0.0811	0.903	0.903	0.903	0.595	1
753	V$HSF_Q6	0.342	-	-	-	0.1	0.0811	0.903	0.903	0.903	0.595	1
754	REACTOME_RORA_ACTIVATES_CIRCADIAN_EXPRESSION	0.342	-	-	-	<0.1	0.0812	0.903	0.903	0.903	0.595	1
755	V$MIF1_01	0.342	-	-	-	0.1	0.0813	0.903	0.903	0.903	0.595	1
756	MATZUK_STEROIDOGENESIS	0.342	-	-	-	0.1	0.0813	0.903	0.903	0.903	0.596	1
757	MADAN_DPPA4_TARGETS	0.342	-	-	-	<0.1	0.0814	0.903	0.903	0.903	0.596	1
758	VERNOCHET_ADIPOGENESIS	0.342	-	-	-	0.2	0.0814	0.903	0.903	0.903	0.596	1
759	REACTOME_SYNTHESIS_OF_BILE_ACIDS_AND_BILE_SALTS	0.342	-	-	-	0.2	0.0814	0.903	0.903	0.903	0.596	1
760	VECCHI_GASTRIC_CANCER_ADVANCED_VS_EARLY_DN	0.342	-	-	-	<0.1	0.0815	0.903	0.903	0.903	0.597	1
761	SECONDARY_ACTIVE_TRANSMEMBRANE_TRANSPORTER_ACTIVITY	0.342	-	-	-	<0.1	0.0816	0.903	0.903	0.903	0.597	1
762	CROMER_METASTASIS	0.341	-	-	-	0.1	0.0818	0.903	0.903	0.903	0.598	1
763	FARDIN_HYPOXIA_9	0.341	-	-	-	0.3	0.0822	0.903	0.903	0.903	0.6	1
764	RESPIRATORY_GASEOUS_EXCHANGE	0.341	-	-	-	0.1	0.0822	0.903	0.903	0.903	0.6	1
765	FIGUEROA_AML_METHYLATION_CLUSTER_3	0.341	-	-	-	0.1	0.0822	0.903	0.903	0.903	0.6	1
766	GAUSSMANN_MLL_AF4_FUSION_TARGETS_D_DN	0.341	-	-	-	0.1	0.0825	0.903	0.903	0.903	0.601	1
767	HEME_BIOSYNTHETIC_PROCESS	0.341	-	-	-	<0.1	0.0825	0.903	0.903	0.903	0.601	1
768	V$RFX1_02	0.34	-	-	-	<0.1	0.0827	0.903	0.903	0.903	0.602	1
769	KEGG_ASCORBATE_AND_ALDARATE_METABOLISM	0.34	-	-	-	<0.1	0.0829	0.903	0.903	0.903	0.603	1
770	TRANSCRIPTION_REPRESSOR_ACTIVITY	0.34	-	-	-	<0.1	0.0829	0.903	0.903	0.903	0.603	1
771	KEGG_PORPHYRIN_AND_CHLOROPHYLL_METABOLISM	0.34	-	-	-	<0.1	0.0829	0.903	0.903	0.903	0.603	1
772	G1_S_TRANSITION_OF_MITOTIC_CELL_CYCLE	0.34	-	-	-	<0.1	0.083	0.903	0.903	0.903	0.603	1
773	V$NKX62_Q2	0.34	-	-	-	<0.1	0.083	0.903	0.903	0.903	0.603	1
774	HOEGERKORP_CD44_TARGETS_TEMPORAL_UP	0.34	-	-	-	0.1	0.0832	0.903	0.903	0.903	0.604	1
775	WYAAANNRNNNGCG_UNKNOWN	0.34	-	-	-	0.1	0.0834	0.903	0.903	0.903	0.605	1
776	ALONSO_METASTASIS_EMT_DN	0.34	-	-	-	<0.1	0.0836	0.903	0.903	0.903	0.606	1
777	NIKOLSKY_BREAST_CANCER_12Q13_Q21_AMPLICON	0.34	-	-	-	0.1	0.0836	0.903	0.903	0.903	0.606	1
778	BOGNI_TREATMENT_RELATED_MYELOID_LEUKEMIA_DN	0.339	-	-	-	0.3	0.0836	0.903	0.903	0.903	0.607	1
779	YTCCCRNNAGGY_UNKNOWN	0.339	-	-	-	0.1	0.0837	0.903	0.903	0.903	0.607	1
780	ZEMBUTSU_SENSITIVITY_TO_VINBLASTINE	0.339	-	-	-	0.1	0.0837	0.903	0.903	0.903	0.607	1
781	CELLULAR_PROTEIN_COMPLEX_ASSEMBLY	0.339	-	-	-	0.1	0.084	0.905	0.905	0.905	0.608	1
782	V$OCT1_07	0.339	-	-	-	<0.1	0.0841	0.905	0.905	0.905	0.608	1
783	DAVICIONI_MOLECULAR_ARMS_VS_ERMS_UP	0.339	-	-	-	0.1	0.0842	0.905	0.905	0.905	0.609	1
784	TMTCGCGANR_UNKNOWN	0.339	-	-	-	0.1	0.0843	0.905	0.905	0.905	0.609	1
785	HEME_METABOLIC_PROCESS	0.339	-	-	-	<0.1	0.0845	0.905	0.905	0.905	0.61	1
786	PURBEY_TARGETS_OF_CTBP1_NOT_SATB1_DN	0.338	-	-	-	0.1	0.0849	0.906	0.906	0.906	0.612	1
787	REACTOME_SYNTHESIS_OF_DNA	0.338	-	-	-	0.1	0.0849	0.906	0.906	0.906	0.612	1
788	GTTRYCATRR_UNKNOWN	0.338	-	-	-	<0.1	0.085	0.906	0.906	0.906	0.612	1
789	BENPORATH_PRC2_TARGETS	0.338	-	-	-	<0.1	0.0851	0.906	0.906	0.906	0.613	1
790	MARIADASON_RESPONSE_TO_BUTYRATE_CURCUMIN_SULINDAC_TSA_2	0.338	-	-	-	0.2	0.0853	0.906	0.906	0.906	0.613	1
791	NADELLA_PRKAR1A_TARGETS	0.338	-	-	-	0.1	0.0853	0.906	0.906	0.906	0.614	1
792	REACTOME_ION_TRANSPORT_BY_P_TYPE_ATPASES	0.338	-	-	-	<0.1	0.0854	0.906	0.906	0.906	0.614	1
793	GCAAGGA,MIR-502	0.338	-	-	-	<0.1	0.0855	0.906	0.906	0.906	0.615	1
794	V$AREB6_02	0.338	-	-	-	<0.1	0.0856	0.906	0.906	0.906	0.615	1
795	IIZUKA_LIVER_CANCER_PROGRESSION_G2_G3	0.337	-	-	-	0.1	0.0858	0.906	0.906	0.906	0.616	1
796	SHETH_LIVER_CANCER_VS_TXNIP_LOSS_PAM4	0.337	-	-	-	0.1	0.086	0.906	0.906	0.906	0.617	1
797	V$AP4_01	0.337	-	-	-	<0.1	0.086	0.906	0.906	0.906	0.617	1
798	REACTOME_ABCA_TRANSPORTERS_IN_LIPID_HOMEOSTASIS	0.337	-	-	-	0.1	0.0864	0.906	0.906	0.906	0.618	1
799	KEGG_TAURINE_AND_HYPOTAURINE_METABOLISM	0.337	-	-	-	0.1	0.0865	0.906	0.906	0.906	0.619	1
800	REACTOME_PASSIVE_TRANSPORT_BY_AQUAPORINS	0.337	-	-	-	0.1	0.0865	0.906	0.906	0.906	0.619	1
801	KEGG_GLYCINE_SERINE_AND_THREONINE_METABOLISM	0.337	-	-	-	<0.1	0.0867	0.906	0.906	0.906	0.62	1
802	MIKKELSEN_NPC_HCP_WITH_H3K27ME3	0.337	-	-	-	<0.1	0.0869	0.906	0.906	0.906	0.621	1
803	REACTOME_LATENT_INFECTION_OF_HOMO_SAPIENS_WITH_MYCOBACTERIUM_TUBERCULOSIS	0.336	-	-	-	0.1	0.087	0.906	0.906	0.906	0.621	1
804	SHIN_B_CELL_LYMPHOMA_CLUSTER_1	0.336	-	-	-	0.1	0.087	0.906	0.906	0.906	0.622	1
805	NAGY_TFTC_COMPONENTS_HUMAN	0.336	-	-	-	0.1	0.0871	0.906	0.906	0.906	0.622	1
806	GERHOLD_ADIPOGENESIS	0.336	-	-	-	0.1	0.0871	0.906	0.906	0.906	0.622	1
807	REACTOME_METABOLISM_OF_LIPIDS_AND_LIPOPROTEINS	0.336	-	-	-	0.1	0.0872	0.906	0.906	0.906	0.622	1
808	KRAS.BREAST_UP.V1_DN (12p12.1)	0.336	-	-	-	<0.1	0.0872	0.906	0.906	0.906	0.623	1
809	BIOCARTA_RARRXR_PATHWAY	0.336	-	-	-	<0.1	0.0873	0.906	0.906	0.906	0.623	1
810	ERB2_UP.V1	0.336	-	-	-	0.1	0.0874	0.906	0.906	0.906	0.623	1
811	RGTTAMWNATT_V$HNF1_01	0.336	-	-	-	<0.1	0.0874	0.906	0.906	0.906	0.623	1
812	PETRETTO_BLOOD_PRESSURE_UP	0.336	-	-	-	0.3	0.0879	0.906	0.906	0.906	0.626	1
813	GTACAGG,MIR-486	0.336	-	-	-	0.1	0.088	0.906	0.906	0.906	0.627	1
814	BIOCARTA_KREB_PATHWAY	0.336	-	-	-	0.1	0.0882	0.906	0.906	0.906	0.627	1
815	OUILLETTE_CLL_13Q14_DELETION	0.335	-	-	-	0.1	0.0882	0.906	0.906	0.906	0.627	1
816	ATGTAGC,MIR-221,MIR-222	0.335	-	-	-	<0.1	0.0884	0.906	0.906	0.906	0.628	1
817	REACTOME_TANDEM_PORE_DOMAIN_POTASSIUM_CHANNELS	0.335	-	-	-	<0.1	0.0888	0.906	0.906	0.906	0.629	1
818	VALK_AML_CLUSTER_5	0.335	-	-	-	0.4	0.0891	0.906	0.906	0.906	0.631	1
819	ATGTTAA,MIR-302C	0.335	-	-	-	0.1	0.0894	0.906	0.906	0.906	0.632	1
820	REACTOME_AMINO_ACID_TRANSPORT_ACROSS_THE_PLASMA_MEMBRANE	0.335	-	-	-	0.1	0.0894	0.906	0.906	0.906	0.632	1
821	CELLULAR_LIPID_METABOLIC_PROCESS	0.334	-	-	-	0.1	0.0895	0.906	0.906	0.906	0.632	1
822	V$PAX4_01	0.334	-	-	-	<0.1	0.0895	0.906	0.906	0.906	0.632	1
823	HALLMARK_KRAS_SIGNALING_DN	0.334	-	-	-	<0.1	0.0895	0.906	0.906	0.906	0.632	1
824	WEINMANN_ADAPTATION_TO_HYPOXIA	0.334	-	-	-	<0.1	0.0897	0.906	0.906	0.906	0.633	1
825	REACTOME_SLC_MEDIATED_TRANSMEMBRANE_TRANSPORT	0.334	-	-	-	<0.1	0.0897	0.906	0.906	0.906	0.633	1
826	CELL_PROJECTION	0.334	-	-	-	<0.1	0.0899	0.906	0.906	0.906	0.634	1
827	LUI_THYROID_CANCER_PAX8_PPARG_UP	0.334	-	-	-	0.1	0.0899	0.906	0.906	0.906	0.634	1
828	GRATIAS_RETINOBLASTOMA_16Q24	0.334	-	-	-	0.2	0.09	0.906	0.906	0.906	0.634	1
829	GARGALOVIC_RESPONSE_TO_OXIDIZED_PHOSPHOLIPIDS_YELLOW_UP	0.334	-	-	-	0.2	0.09	0.906	0.906	0.906	0.634	1
830	SCHAEFFER_PROSTATE_DEVELOPMENT_AND_CANCER_BOX5	0.334	-	-	-	<0.1	0.09	0.906	0.906	0.906	0.634	1
831	BERNARD_PPAPDC1B_TARGETS_DN	0.334	-	-	-	0.1	0.0901	0.906	0.906	0.906	0.634	1
832	SUBSTRATE_SPECIFIC_TRANSPORTER_ACTIVITY	0.334	-	-	-	<0.1	0.0903	0.906	0.906	0.906	0.635	1
833	REACTOME_GLYCOSPHINGOLIPID_METABOLISM	0.334	-	-	-	0.3	0.0903	0.906	0.906	0.906	0.635	1
834	TAVAZOIE_METASTASIS	0.334	-	-	-	0.2	0.0903	0.906	0.906	0.906	0.635	1
835	LINDGREN_BLADDER_CANCER_CLUSTER_3	0.334	-	-	-	<0.1	0.0904	0.906	0.906	0.906	0.636	1
836	TGAGATT,MIR-216	0.334	-	-	-	<0.1	0.0905	0.906	0.906	0.906	0.636	1
837	IRITANI_MAD1_TARGETS	0.334	-	-	-	0.2	0.0906	0.906	0.906	0.906	0.636	1
838	RICKMAN_HEAD_AND_NECK_CANCER_B	0.333	-	-	-	0.1	0.0907	0.906	0.906	0.906	0.637	1
839	HESS_TARGETS_OF_HOXA9_AND_MEIS1	0.333	-	-	-	0.1	0.0908	0.906	0.906	0.906	0.637	1
840	VERHAAK_GLIOBLASTOMA_PRONEURAL	0.333	-	-	-	<0.1	0.0908	0.906	0.906	0.906	0.637	1
841	KANG_CISPLATIN_RESISTANCE_DN	0.333	-	-	-	0.2	0.0909	0.906	0.906	0.906	0.637	1
842	REACTOME_CIRCADIAN_REPRESSION_OF_EXPRESSION_BY_REV_ERBA	0.333	-	-	-	<0.1	0.0909	0.906	0.906	0.906	0.637	1
843	REACTOME_CELL_CYCLE_CHECKPOINTS	0.333	-	-	-	0.1	0.0909	0.906	0.906	0.906	0.637	1
844	JIANG_CORE_DUPLICON_GENES	0.333	-	-	-	<0.1	0.0911	0.906	0.906	0.906	0.638	1
845	NEUROPEPTIDE_RECEPTOR_ACTIVITY	0.333	-	-	-	0.1	0.0911	0.906	0.906	0.906	0.638	1
846	MYLLYKANGAS_AMPLIFICATION_HOT_SPOT_22	0.333	-	-	-	0.1	0.0912	0.906	0.906	0.906	0.639	1
847	CHESLER_BRAIN_D6MIT150_QTL_TRANS	0.333	-	-	-	<0.1	0.0913	0.906	0.906	0.906	0.639	1
848	BENPORATH_ES_WITH_H3K27ME3	0.333	-	-	-	<0.1	0.0916	0.906	0.906	0.906	0.64	1
849	KIM_ALL_DISORDERS_CALB1_CORR_UP	0.333	-	-	-	<0.1	0.0916	0.906	0.906	0.906	0.641	1
850	FREDERICK_PRKCI_TARGETS	0.333	-	-	-	0.2	0.0916	0.906	0.906	0.906	0.641	1
851	RIZ_ERYTHROID_DIFFERENTIATION_HBZ	0.332	-	-	-	<0.1	0.0918	0.906	0.906	0.906	0.642	1
852	TRANSLATIONAL_INITIATION	0.332	-	-	-	0.1	0.0919	0.906	0.906	0.906	0.642	1
853	GGCNNMSMYNTTG_UNKNOWN	0.332	-	-	-	0.2	0.0919	0.906	0.906	0.906	0.642	1
854	REACTOME_ENERGY_DEPENDENT_REGULATION_OF_MTOR_BY_LKB1_AMPK	0.332	-	-	-	0.1	0.092	0.906	0.906	0.906	0.642	1
855	LIANG_SILENCED_BY_METHYLATION_DN	0.332	-	-	-	<0.1	0.0923	0.908	0.908	0.908	0.643	1
856	KEGG_CITRATE_CYCLE_TCA_CYCLE	0.332	-	-	-	0.1	0.0925	0.909	0.909	0.909	0.644	1
857	REACTOME_DARPP_32_EVENTS	0.332	-	-	-	0.3	0.0927	0.91	0.91	0.91	0.645	1
858	FATTY_ACID_OXIDATION	0.332	-	-	-	0.3	0.093	0.911	0.911	0.911	0.646	1
859	POLYSACCHARIDE_METABOLIC_PROCESS	0.331	-	-	-	<0.1	0.0934	0.911	0.911	0.911	0.648	1
860	METHYLTRANSFERASE_ACTIVITY	0.331	-	-	-	0.2	0.0934	0.911	0.911	0.911	0.648	1
861	RUTELLA_RESPONSE_TO_CSF2RB_AND_IL4	0.331	-	-	-	<0.1	0.0934	0.911	0.911	0.911	0.648	1
862	ZHAN_VARIABLE_EARLY_DIFFERENTIATION_GENES	0.331	-	-	-	0.1	0.0934	0.911	0.911	0.911	0.648	1
863	WANG_RESPONSE_TO_BEXAROTENE	0.331	-	-	-	0.1	0.0936	0.911	0.911	0.911	0.649	1
864	SASAI_TARGETS_OF_CXCR6_AND_PTCH1	0.331	-	-	-	0.1	0.0936	0.911	0.911	0.911	0.649	1
865	EARLY_ENDOSOME	0.331	-	-	-	0.2	0.0937	0.912	0.912	0.912	0.65	1
866	TERAMOTO_OPN_TARGETS_CLUSTER_3	0.331	-	-	-	<0.1	0.094	0.913	0.913	0.913	0.651	1
867	SMID_BREAST_CANCER_RELAPSE_IN_LIVER_UP	0.331	-	-	-	0.1	0.0942	0.913	0.913	0.913	0.652	1
868	KEGG_MISMATCH_REPAIR	0.331	-	-	-	0.1	0.0942	0.913	0.913	0.913	0.652	1
869	MIKI_COEXPRESSED_WITH_CYP19A1	0.331	-	-	-	0.1	0.0944	0.914	0.914	0.914	0.653	1
870	V$COUP_DR1_Q6	0.33	-	-	-	<0.1	0.0947	0.916	0.916	0.916	0.653	1
871	V$HEB_Q6	0.33	-	-	-	<0.1	0.095	0.916	0.916	0.916	0.654	1
872	REACTOME_MITOTIC_G1_G1_S_PHASES	0.33	-	-	-	0.1	0.095	0.916	0.916	0.916	0.655	1
873	NIKOLSKY_BREAST_CANCER_6P24_P22_AMPLICON	0.33	-	-	-	0.2	0.0951	0.916	0.916	0.916	0.655	1
874	COLLIS_PRKDC_REGULATORS	0.33	-	-	-	<0.1	0.0952	0.917	0.917	0.917	0.656	1
875	CUI_TCF21_TARGETS_2	0.33	-	-	-	0.1	0.0954	0.917	0.917	0.917	0.656	1
876	MEISSNER_NPC_HCP_WITH_H3K4ME2_AND_H3K27ME3	0.33	-	-	-	<0.1	0.0955	0.917	0.917	0.917	0.657	1
877	TENEDINI_MEGAKARYOCYTE_MARKERS	0.329	-	-	-	0.3	0.0959	0.92	0.92	0.92	0.658	1
878	IRITANI_MAD1_TARGETS_UP	0.329	-	-	-	0.2	0.0959	0.92	0.92	0.92	0.658	1
879	KEGG_ARGININE_AND_PROLINE_METABOLISM	0.329	-	-	-	0.3	0.0961	0.92	0.92	0.92	0.659	1
880	OXFORD_RALB_TARGETS_DN	0.329	-	-	-	0.1	0.0963	0.92	0.92	0.92	0.659	1
881	ORGANELLAR_SMALL_RIBOSOMAL_SUBUNIT (3)	0.329	-	-	-	0.4	0.0963	0.92	0.92	0.92	0.659	1
882	CACTTTG,MIR-520G,MIR-520H	0.329	-	-	-	<0.1	0.0964	0.92	0.92	0.92	0.66	1
883	CAHOY_ASTROCYTIC	0.329	-	-	-	0.1	0.0969	0.923	0.923	0.923	0.661	1
884	ACTGCAG,MIR-17-3P	0.329	-	-	-	<0.1	0.097	0.924	0.924	0.924	0.662	1
885	JNK_CASCADE	0.328	-	-	-	<0.1	0.0971	0.924	0.924	0.924	0.663	1
886	V$ZID_01	0.328	-	-	-	<0.1	0.0973	0.924	0.924	0.924	0.663	1
887	CTCAGGG,MIR-125B,MIR-125A	0.328	-	-	-	<0.1	0.0973	0.924	0.924	0.924	0.663	1
888	BHAT_ESR1_TARGETS_NOT_VIA_AKT1_DN	0.328	-	-	-	0.3	0.0976	0.925	0.925	0.925	0.665	1
889	V$HOX13_01	0.328	-	-	-	<0.1	0.0983	0.928	0.928	0.928	0.667	1
890	GTCGATC,MIR-369-5P	0.328	-	-	-	<0.1	0.0983	0.928	0.928	0.928	0.667	1
891	SECRETION_BY_CELL	0.328	-	-	-	0.2	0.0984	0.928	0.928	0.928	0.668	1
892	RIGGINS_TAMOXIFEN_RESISTANCE	0.327	-	-	-	<0.1	0.0984	0.928	0.928	0.928	0.668	1
893	MURAKAMI_UV_RESPONSE_1HR_DN	0.327	-	-	-	0.1	0.0986	0.928	0.928	0.928	0.668	1
894	WALLACE_PROSTATE_CANCER_UP	0.327	-	-	-	0.1	0.0986	0.928	0.928	0.928	0.669	1
895	REACTOME_REMOVAL_OF_THE_FLAP_INTERMEDIATE_FROM_THE_C_STRAND	0.327	-	-	-	0.1	0.0987	0.928	0.928	0.928	0.669	1
896	GUENTHER_GROWTH_SPHERICAL_VS_ADHERENT	0.327	-	-	-	0.1	0.099	0.929	0.929	0.929	0.67	1
897	KESHELAVA_MULTIPLE_DRUG_RESISTANCE	0.327	-	-	-	0.2	0.0993	0.931	0.931	0.931	0.67	1
898	HALLMARK_UNFOLDED_PROTEIN_RESPONSE	0.327	-	-	-	0.2	0.0995	0.933	0.933	0.933	0.671	1
899	BIOCARTA_RAB_PATHWAY	0.326	-	-	-	0.2	0.0998	0.933	0.933	0.933	0.672	1
900	MMS_MOUSE_LYMPH_HIGH_4HRS_UP	0.326	-	-	-	0.2	0.0999	0.933	0.933	0.933	0.672	1
901	FRIDMAN_SENESCENCE_DN	0.326	-	-	-	0.1	0.0999	0.933	0.933	0.933	0.672	1
902	KYNG_WERNER_SYNDROM_AND_NORMAL_AGING_DN	0.326	-	-	-	0.2	0.1	0.933	0.933	0.933	0.674	1
903	CYTOSOLIC_PART	0.326	-	-	-	<0.1	0.1	0.933	0.933	0.933	0.675	1
904	V$NCX_01	0.326	-	-	-	0.1	0.101	0.933	0.933	0.933	0.675	1
905	VANHARANTA_UTERINE_FIBROID	0.326	-	-	-	0.1	0.101	0.933	0.933	0.933	0.676	1
906	TGCTGCT,MIR-15A,MIR-16,MIR-15B,MIR-195,MIR-424,MIR-497	0.326	-	-	-	0.1	0.101	0.933	0.933	0.933	0.676	1
907	SHETH_LIVER_CANCER_VS_TXNIP_LOSS_PAM5	0.326	-	-	-	0.1	0.101	0.933	0.933	0.933	0.677	1
908	VESICLE_MEDIATED_TRANSPORT	0.325	-	-	-	0.1	0.101	0.933	0.933	0.933	0.678	1
909	LTE2_UP.V1_UP	0.325	-	-	-	0.2	0.102	0.933	0.933	0.933	0.679	1
910	REGULATION_OF_GENE_EXPRESSION_EPIGENETIC	0.325	-	-	-	<0.1	0.102	0.933	0.933	0.933	0.679	1
911	REACTOME_S_PHASE	0.325	-	-	-	0.1	0.102	0.933	0.933	0.933	0.679	1
912	BMI1_DN_MEL18_DN.V1_DN (10p13)	0.325	-	-	-	<0.1	0.102	0.933	0.933	0.933	0.679	1
913	POMEROY_MEDULLOBLASTOMA_DESMOPLASIC_VS_CLASSIC_UP	0.325	-	-	-	<0.1	0.102	0.933	0.933	0.933	0.68	1
914	WIERENGA_PML_INTERACTOME	0.325	-	-	-	0.1	0.102	0.933	0.933	0.933	0.68	1
915	REACTOME_DOWNSTREAM_SIGNAL_TRANSDUCTION	0.325	-	-	-	0.1	0.102	0.933	0.933	0.933	0.68	1
916	MOHANKUMAR_TLX1_TARGETS_UP	0.325	-	-	-	0.2	0.102	0.933	0.933	0.933	0.68	1
917	FERRARI_RESPONSE_TO_FENRETINIDE_DN	0.325	-	-	-	0.1	0.102	0.933	0.933	0.933	0.681	1
918	V$AP2_Q3	0.325	-	-	-	<0.1	0.102	0.933	0.933	0.933	0.681	1
919	ACAWNRNSRCGG_UNKNOWN	0.325	-	-	-	<0.1	0.102	0.933	0.933	0.933	0.681	1
920	WEST_ADRENOCORTICAL_TUMOR_MARKERS	0.325	-	-	-	0.2	0.102	0.933	0.933	0.933	0.681	1
921	CELLULAR_HOMEOSTASIS	0.324	-	-	-	<0.1	0.103	0.933	0.933	0.933	0.682	1
922	WATTEL_AUTONOMOUS_THYROID_ADENOMA_UP	0.324	-	-	-	<0.1	0.103	0.933	0.933	0.933	0.682	1
923	DURCHDEWALD_SKIN_CARCINOGENESIS	0.324	-	-	-	0.1	0.103	0.933	0.933	0.933	0.682	1
924	AMINO_ACID_DERIVATIVE_BIOSYNTHETIC_PROCESS	0.324	-	-	-	0.1	0.103	0.933	0.933	0.933	0.683	1
925	TTCYRGAA_UNKNOWN	0.324	-	-	-	<0.1	0.103	0.933	0.933	0.933	0.684	1
926	V$FOXM1_01	0.324	-	-	-	0.1	0.103	0.933	0.933	0.933	0.684	1
927	RIZ_ERYTHROID_DIFFERENTIATION_APOBEC2	0.324	-	-	-	0.1	0.103	0.933	0.933	0.933	0.684	1
928	BILBAN_B_CLL_LPL	0.324	-	-	-	0.1	0.103	0.933	0.933	0.933	0.684	1
929	BLALOCK_ALZHEIMERS_DISEASE_DN	0.324	-	-	-	<0.1	0.103	0.933	0.933	0.933	0.684	1
930	RAMALHO_STEMNESS	0.324	-	-	-	0.1	0.103	0.933	0.933	0.933	0.685	1
931	GGTAACC,MIR-409-5P	0.323	-	-	-	<0.1	0.104	0.933	0.933	0.933	0.685	1
932	GTGCAAT,MIR-25,MIR-32,MIR-92,MIR-363,MIR-367	0.323	-	-	-	0.1	0.104	0.933	0.933	0.933	0.685	1
933	REACTOME_MEMBRANE_TRAFFICKING	0.323	-	-	-	0.2	0.104	0.933	0.933	0.933	0.686	1
934	HERNANDEZ_ABERRANT_MITOSIS_BY_DOCETACEL_4NM_DN	0.323	-	-	-	<0.1	0.104	0.933	0.933	0.933	0.687	1
935	NIKOLSKY_BREAST_CANCER_17Q11_Q21_AMPLICON	0.323	-	-	-	<0.1	0.104	0.933	0.933	0.933	0.687	1
936	REACTOME_G1_S_TRANSITION	0.323	-	-	-	0.1	0.104	0.933	0.933	0.933	0.688	1
937	CARBON_OXYGEN_LYASE_ACTIVITY	0.323	-	-	-	0.3	0.104	0.933	0.933	0.933	0.688	1
938	REACTOME_EXTENSION_OF_TELOMERES	0.323	-	-	-	<0.1	0.104	0.933	0.933	0.933	0.688	1
939	LI_CISPLATIN_RESISTANCE_UP	0.323	-	-	-	0.1	0.105	0.933	0.933	0.933	0.689	1
940	CAMP_UP.V1 (3p21.3)	0.323	-	-	-	0.1	0.105	0.933	0.933	0.933	0.689	1
941	REACTOME_CD28_DEPENDENT_PI3K_AKT_SIGNALING	0.323	-	-	-	0.2	0.105	0.933	0.933	0.933	0.689	1
942	REACTOME_DSCAM_INTERACTIONS	0.323	-	-	-	0.1	0.105	0.933	0.933	0.933	0.69	1
943	ZHAN_MULTIPLE_MYELOMA_CD1_AND_CD2_UP	0.323	-	-	-	0.1	0.105	0.933	0.933	0.933	0.691	1
944	KEGG_STEROID_HORMONE_BIOSYNTHESIS	0.323	-	-	-	<0.1	0.105	0.933	0.933	0.933	0.691	1
945	ESTABLISHMENT_AND_OR_MAINTENANCE_OF_CELL_POLARITY	0.322	-	-	-	0.1	0.105	0.933	0.933	0.933	0.691	1
946	REACTOME_SIGNALING_BY_NOTCH	0.322	-	-	-	<0.1	0.105	0.933	0.933	0.933	0.691	1
947	BRIDEAU_IMPRINTED_GENES	0.322	-	-	-	0.1	0.105	0.933	0.933	0.933	0.691	1
948	CARBOXYPEPTIDASE_ACTIVITY	0.322	-	-	-	0.2	0.105	0.933	0.933	0.933	0.691	1
949	V$TAL1BETAE47_01	0.322	-	-	-	0.1	0.105	0.933	0.933	0.933	0.692	1
950	RUAN_RESPONSE_TO_TNF_DN	0.322	-	-	-	0.3	0.105	0.933	0.933	0.933	0.692	1
951	AAACCAC,MIR-140	0.322	-	-	-	0.1	0.105	0.933	0.933	0.933	0.692	1
952	V$OCT1_04	0.322	-	-	-	<0.1	0.106	0.933	0.933	0.933	0.693	1
953	NOTCH_DN.V1_DN	0.322	-	-	-	<0.1	0.106	0.933	0.933	0.933	0.693	1
954	FRASOR_RESPONSE_TO_SERM_OR_FULVESTRANT_UP	0.322	-	-	-	0.2	0.106	0.935	0.935	0.935	0.695	1
955	V$T3R_Q6	0.322	-	-	-	<0.1	0.106	0.937	0.937	0.937	0.696	1
956	HANN_RESISTANCE_TO_BCL2_INHIBITOR_DN	0.321	-	-	-	<0.1	0.107	0.937	0.937	0.937	0.698	1
957	DARWICHE_SQUAMOUS_CELL_CARCINOMA_DN	0.321	-	-	-	<0.1	0.107	0.937	0.937	0.937	0.698	1
958	ORGANELLE_INNER_MEMBRANE	0.321	-	-	-	<0.1	0.107	0.937	0.937	0.937	0.698	1
959	REACTOME_SIGNALING_BY_NOTCH1	0.321	-	-	-	<0.1	0.107	0.937	0.937	0.937	0.698	1
960	PARK_OSTEOBLAST_DIFFERENTIATION_BY_PHENYLAMIL	0.321	-	-	-	<0.1	0.107	0.937	0.937	0.937	0.7	1
961	KIM_BIPOLAR_DISORDER_OLIGODENDROCYTE_DENSITY_CORR_UP	0.321	-	-	-	0.1	0.107	0.937	0.937	0.937	0.701	1
962	HALLMARK_SPERMATOGENESIS	0.321	-	-	-	<0.1	0.107	0.937	0.937	0.937	0.701	1
963	NIKOLSKY_BREAST_CANCER_19P13_AMPLICON	0.321	-	-	-	<0.1	0.108	0.937	0.937	0.937	0.702	1
964	OXFORD_RALA_AND_RALB_TARGETS	0.321	-	-	-	0.1	0.108	0.937	0.937	0.937	0.702	1
965	V$E2F1DP1_01 (3)	0.32	-	-	-	0.1	0.108	0.937	0.937	0.937	0.702	1
966	PDGF_ERK_DN.V1_DN	0.32	-	-	-	0.1	0.108	0.937	0.937	0.937	0.703	1
967	LEIN_LOCALIZED_TO_DISTAL_AND_PROXIMAL_DENDRITES	0.32	-	-	-	0.1	0.108	0.937	0.937	0.937	0.704	1
968	DETECTION_OF_STIMULUS_INVOLVED_IN_SENSORY_PERCEPTION	0.32	-	-	-	0.3	0.108	0.937	0.937	0.937	0.704	1
969	REN_ALVEOLAR_RHABDOMYOSARCOMA_UP (1q32)	0.32	-	-	-	<0.1	0.108	0.937	0.937	0.937	0.705	1
970	V$AP2_Q6_01	0.32	-	-	-	<0.1	0.109	0.937	0.937	0.937	0.705	1
971	BROWNE_HCMV_INFECTION_14HR	0.32	-	-	-	<0.1	0.109	0.937	0.937	0.937	0.705	1
972	KAPOSI_LIVER_CANCER_MET_DN	0.32	-	-	-	<0.1	0.109	0.937	0.937	0.937	0.706	1
973	RAF_UP.V1_DN	0.32	-	-	-	0.3	0.109	0.937	0.937	0.937	0.707	1
974	MORI_EMU_MYC_LYMPHOMA_BY_ONSET_TIME	0.319	-	-	-	0.1	0.11	0.937	0.937	0.937	0.708	1
975	V$ZF5_01	0.319	-	-	-	0.2	0.11	0.937	0.937	0.937	0.708	1
976	WU_HBX_TARGETS_3	0.319	-	-	-	<0.1	0.11	0.937	0.937	0.937	0.71	1
977	ACATATC,MIR-190	0.319	-	-	-	0.3	0.11	0.937	0.937	0.937	0.71	1
978	VISALA_AGING_LYMPHOCYTE	0.319	-	-	-	<0.1	0.11	0.937	0.937	0.937	0.71	1
979	V$SP1_01	0.319	-	-	-	<0.1	0.11	0.937	0.937	0.937	0.711	1
980	V$MYCMAX_B	0.319	-	-	-	<0.1	0.11	0.937	0.937	0.937	0.711	1
981	V$SF1_Q6	0.319	-	-	-	0.1	0.11	0.937	0.937	0.937	0.711	1
982	BOYAULT_LIVER_CANCER_SUBCLASS_G123	0.319	-	-	-	0.2	0.11	0.937	0.937	0.937	0.712	1
983	UNFOLDED_PROTEIN_RESPONSE	0.319	-	-	-	0.3	0.111	0.937	0.937	0.937	0.712	1
984	CHLORIDE_CHANNEL_ACTIVITY	0.318	-	-	-	0.1	0.111	0.937	0.937	0.937	0.712	1
985	CELLULAR_LOCALIZATION	0.318	-	-	-	0.2	0.111	0.937	0.937	0.937	0.713	1
986	CAFFAREL_RESPONSE_TO_THC_24HR_3_UP	0.318	-	-	-	0.4	0.111	0.937	0.937	0.937	0.713	1
987	RHO_PROTEIN_SIGNAL_TRANSDUCTION (3q21-q24)	0.318	-	-	-	<0.1	0.111	0.937	0.937	0.937	0.713	1
988	TONG_INTERACT_WITH_PTTG1	0.318	-	-	-	0.1	0.111	0.937	0.937	0.937	0.713	1
989	HAHTOLA_MYCOSIS_FUNGOIDES_DN	0.318	-	-	-	<0.1	0.111	0.937	0.937	0.937	0.713	1
990	HUANG_FOXA2_TARGETS	0.318	-	-	-	<0.1	0.111	0.937	0.937	0.937	0.714	1
991	KEGG_AMINO_SUGAR_AND_NUCLEOTIDE_SUGAR_METABOLISM	0.318	-	-	-	0.6	0.111	0.937	0.937	0.937	0.714	1
992	PENG_LEUCINE_DEPRIVATION	0.318	-	-	-	<0.1	0.111	0.937	0.937	0.937	0.714	1
993	NOUSHMEHR_GBM_GERMLINE_MUTATED	0.318	-	-	-	0.2	0.111	0.937	0.937	0.937	0.715	1
994	OXIDOREDUCTASE_ACTIVITY	0.318	-	-	-	0.1	0.111	0.937	0.937	0.937	0.715	1
995	TCCAGAT,MIR-516-5P	0.318	-	-	-	<0.1	0.112	0.937	0.937	0.937	0.715	1
996	POSITIVE_REGULATION_OF_MAPKKK_CASCADE	0.318	-	-	-	0.2	0.112	0.937	0.937	0.937	0.715	1
997	AMBROSINI_FLAVOPIRIDOL_TREATMENT_TP53	0.318	-	-	-	0.1	0.112	0.937	0.937	0.937	0.716	1
998	WATANABE_RECTAL_CANCER_RADIOTHERAPY_RESPONSIVE	0.318	-	-	-	0.2	0.112	0.937	0.937	0.937	0.716	1
999	GTGTCAA,MIR-514	0.318	-	-	-	0.1	0.112	0.937	0.937	0.937	0.716	1
1000	VALK_AML_CLUSTER_16	0.317	-	-	-	<0.1	0.112	0.937	0.937	0.937	0.717	1
1001	ACEVEDO_LIVER_CANCER_DN	0.317	-	-	-	0.2	0.112	0.937	0.937	0.937	0.717	1
1002	SHIN_B_CELL_LYMPHOMA_CLUSTER_9	0.317	-	-	-	<0.1	0.112	0.937	0.937	0.937	0.717	1
1003	FERRANDO_HOX11_NEIGHBORS	0.317	-	-	-	0.2	0.112	0.937	0.937	0.937	0.717	1
1004	KLEIN_PRIMARY_EFFUSION_LYMPHOMA_UP	0.317	-	-	-	0.4	0.112	0.937	0.937	0.937	0.718	1
1005	AGUIRRE_PANCREATIC_CANCER_COPY_NUMBER_UP	0.317	-	-	-	0.1	0.113	0.937	0.937	0.937	0.719	1
1006	NAGY_STAGA_COMPONENTS_HUMAN	0.317	-	-	-	0.1	0.113	0.937	0.937	0.937	0.72	1
1007	V$AHRARNT_01	0.317	-	-	-	<0.1	0.113	0.937	0.937	0.937	0.72	1
1008	DI__TRI_VALENT_INORGANIC_CATION_TRANSPORT	0.317	-	-	-	<0.1	0.113	0.937	0.937	0.937	0.722	1
1009	REACTOME_ACTIVATION_OF_CHAPERONE_GENES_BY_XBP1S	0.317	-	-	-	0.3	0.113	0.937	0.937	0.937	0.722	1
1010	MIKKELSEN_DEDIFFERENTIATED_STATE_UP	0.316	-	-	-	0.2	0.113	0.937	0.937	0.937	0.722	1
1011	MICROTUBULE	0.316	-	-	-	0.2	0.113	0.937	0.937	0.937	0.722	1
1012	V$E2F_Q6	0.316	-	-	-	0.1	0.113	0.937	0.937	0.937	0.722	1
1013	ATPASE_ACTIVITY_COUPLED_TO_TRANSMEMBRANE_MOVEMENT_OF_IONS_PHOSPHORYLATIVE_MECHANISM	0.316	-	-	-	<0.1	0.113	0.937	0.937	0.937	0.723	1
1014	HADDAD_T_LYMPHOCYTE_AND_NK_PROGENITOR	0.316	-	-	-	0.2	0.114	0.937	0.937	0.937	0.724	1
1015	V$NKX22_01	0.316	-	-	-	0.1	0.114	0.937	0.937	0.937	0.724	1
1016	REACTOME_INSULIN_SYNTHESIS_AND_PROCESSING	0.316	-	-	-	0.3	0.114	0.937	0.937	0.937	0.725	1
1017	BARIS_THYROID_CANCER	0.316	-	-	-	0.3	0.114	0.937	0.937	0.937	0.725	1
1018	REACTOME_THE_ACTIVATION_OF_ARYLSULFATASES	0.316	-	-	-	0.1	0.114	0.937	0.937	0.937	0.725	1
1019	GINESTIER_BREAST_CANCER_ZNF217_AMPLIFIED_DN	0.316	-	-	-	0.1	0.114	0.937	0.937	0.937	0.725	1
1020	COULOUARN_TEMPORAL_TGFB1_SIGNATURE_DN	0.316	-	-	-	<0.1	0.114	0.937	0.937	0.937	0.725	1
1021	TERAMOTO_OPN_TARGETS_CLUSTER_7	0.316	-	-	-	0.1	0.114	0.937	0.937	0.937	0.726	1
1022	MIKKELSEN_DEDIFFERENTIATED_STATE	0.316	-	-	-	<0.1	0.114	0.937	0.937	0.937	0.726	1
1023	REACTOME_P53_DEPENDENT_G1_DNA_DAMAGE_RESPONSE	0.316	-	-	-	0.1	0.114	0.937	0.937	0.937	0.727	1
1024	INTRINSIC_TO_ORGANELLE_MEMBRANE	0.316	-	-	-	0.5	0.115	0.937	0.937	0.937	0.728	1
1025	YAO_TEMPORAL_RESPONSE_TO_PROGESTERONE_CLUSTER_4	0.315	-	-	-	0.2	0.115	0.937	0.937	0.937	0.728	1
1026	RODRIGUES_THYROID_CARCINOMA_POORLY_DIFFERENTIATED_DN	0.315	-	-	-	0.1	0.115	0.937	0.937	0.937	0.728	1
1027	KEGG_TASTE_TRANSDUCTION	0.315	-	-	-	0.1	0.115	0.937	0.937	0.937	0.728	1
1028	PEROXISOMAL_MEMBRANE (2)	0.315	-	-	-	<0.1	0.115	0.937	0.937	0.937	0.729	1
1029	V$ARP1_01	0.315	-	-	-	0.1	0.115	0.937	0.937	0.937	0.73	1
1030	GRASEMANN_RETINOBLASTOMA_WITH_6P_AMPLIFICATION	0.315	-	-	-	0.1	0.115	0.937	0.937	0.937	0.73	1
1031	KEGG_OXIDATIVE_PHOSPHORYLATION	0.315	-	-	-	0.2	0.115	0.937	0.937	0.937	0.73	1
1032	PHOSPHORUS_OXYGEN_LYASE_ACTIVITY (2)	0.315	-	-	-	0.2	0.116	0.937	0.937	0.937	0.73	1
1033	GCGNNANTTCC_UNKNOWN	0.315	-	-	-	<0.1	0.116	0.937	0.937	0.937	0.731	1
1034	V$E2F1_Q3	0.315	-	-	-	0.1	0.116	0.937	0.937	0.937	0.731	1
1035	REACTOME_SULFUR_AMINO_ACID_METABOLISM	0.315	-	-	-	<0.1	0.116	0.937	0.937	0.937	0.732	1
1036	RESPONSE_TO_NUTRIENT	0.315	-	-	-	0.2	0.116	0.937	0.937	0.937	0.732	1
1037	APICAL_PART_OF_CELL	0.315	-	-	-	0.1	0.116	0.937	0.937	0.937	0.732	1
1038	NEGATIVE_REGULATION_OF_CYTOKINE_BIOSYNTHETIC_PROCESS	0.314	-	-	-	0.4	0.116	0.937	0.937	0.937	0.732	1
1039	WEIGEL_OXIDATIVE_STRESS_RESPONSE	0.314	-	-	-	0.1	0.116	0.937	0.937	0.937	0.732	1
1040	KIM_ALL_DISORDERS_OLIGODENDROCYTE_NUMBER_CORR_UP	0.314	-	-	-	0.1	0.117	0.937	0.937	0.937	0.734	1
1041	BERTUCCI_INVASIVE_CARCINOMA_DUCTAL_VS_LOBULAR_UP	0.314	-	-	-	0.1	0.117	0.937	0.937	0.937	0.734	1
1042	POTASSIUM_CHANNEL_ACTIVITY	0.314	-	-	-	<0.1	0.117	0.937	0.937	0.937	0.734	1
1043	MATZUK_SPERMATOZOA	0.314	-	-	-	0.1	0.117	0.937	0.937	0.937	0.734	1
1044	REACTOME_NITRIC_OXIDE_STIMULATES_GUANYLATE_CYCLASE	0.314	-	-	-	<0.1	0.117	0.937	0.937	0.937	0.736	1
1045	OZEN_MIR125B1_TARGETS	0.314	-	-	-	0.1	0.117	0.937	0.937	0.937	0.736	1
1046	N_ACYLTRANSFERASE_ACTIVITY	0.314	-	-	-	<0.1	0.117	0.937	0.937	0.937	0.737	1
1047	ELVIDGE_HIF2A_TARGETS_UP	0.314	-	-	-	0.4	0.117	0.937	0.937	0.937	0.737	1
1048	REACTOME_SYNTHESIS_OF_VERY_LONG_CHAIN_FATTY_ACYL_COAS	0.314	-	-	-	0.1	0.117	0.937	0.937	0.937	0.737	1
1049	TERAO_AOX4_TARGETS_HG	0.314	-	-	-	0.2	0.117	0.937	0.937	0.937	0.737	1
1050	YTTCCNNNGGAMR_UNKNOWN	0.314	-	-	-	0.1	0.117	0.937	0.937	0.937	0.738	1
1051	BRACHAT_RESPONSE_TO_METHOTREXATE	0.314	-	-	-	<0.1	0.117	0.937	0.937	0.937	0.738	1
1052	V$SP1_Q2_01	0.314	-	-	-	<0.1	0.118	0.937	0.937	0.937	0.738	1
1053	KEGG_PROSTATE_CANCER	0.314	-	-	-	<0.1	0.118	0.937	0.937	0.937	0.738	1
1054	STRESS_ACTIVATED_PROTEIN_KINASE_SIGNALING_PATHWAY	0.313	-	-	-	0.2	0.118	0.937	0.937	0.937	0.739	1
1055	CYTOSOL	0.313	-	-	-	0.2	0.118	0.937	0.937	0.937	0.739	1
1056	CREIGHTON_AKT1_SIGNALING_VIA_MTOR_DN	0.313	-	-	-	0.1	0.118	0.937	0.937	0.937	0.74	1
1057	REACTOME_MTORC1_MEDIATED_SIGNALLING	0.313	-	-	-	0.1	0.118	0.937	0.937	0.937	0.74	1
1058	REGULATION_OF_ENDOCYTOSIS	0.313	-	-	-	0.1	0.118	0.937	0.937	0.937	0.74	1
1059	SCHAEFFER_PROSTATE_DEVELOPMENT_AND_CANCER_BOX4_DN	0.313	-	-	-	0.1	0.119	0.937	0.937	0.937	0.741	1
1060	V$CREB_Q3	0.313	-	-	-	<0.1	0.119	0.937	0.937	0.937	0.741	1
1061	ACETYLTRANSFERASE_ACTIVITY	0.313	-	-	-	<0.1	0.119	0.937	0.937	0.937	0.741	1
1062	EGFR_UP.V1_DN (7p12)	0.313	-	-	-	0.2	0.119	0.937	0.937	0.937	0.741	1
1063	SCHMIDT_POR_TARGETS_IN_LIMB_BUD_UP	0.313	-	-	-	<0.1	0.119	0.937	0.937	0.937	0.741	1
1064	KONDO_PROSTATE_CANCER_HCP_WITH_H3K27ME3	0.313	-	-	-	<0.1	0.119	0.937	0.937	0.937	0.742	1
1065	PELLICCIOTTA_HDAC_IN_ANTIGEN_PRESENTATION_UP	0.313	-	-	-	0.3	0.119	0.937	0.937	0.937	0.742	1
1066	LANDIS_ERBB2_BREAST_TUMORS_324	0.313	-	-	-	0.1	0.119	0.937	0.937	0.937	0.742	1
1067	PRC2_EZH2_UP.V1_UP	0.313	-	-	-	0.1	0.119	0.937	0.937	0.937	0.742	1
1068	REACTOME_GLYCEROPHOSPHOLIPID_BIOSYNTHESIS	0.312	-	-	-	0.3	0.119	0.937	0.937	0.937	0.743	1
1069	WIERENGA_STAT5A_TARGETS	0.312	-	-	-	0.1	0.119	0.937	0.937	0.937	0.743	1
1070	BRUNEAU_HEART_GREAT_VESSELS_AND_VALVULOGENESIS	0.312	-	-	-	0.2	0.119	0.937	0.937	0.937	0.743	1
1071	V$E2F_Q4	0.312	-	-	-	0.1	0.119	0.937	0.937	0.937	0.743	1
1072	V$E2F4DP1_01	0.312	-	-	-	0.2	0.119	0.937	0.937	0.937	0.743	1
1073	NUCLEAR_EXPORT	0.312	-	-	-	0.1	0.119	0.937	0.937	0.937	0.743	1
1074	PID_E2F_PATHWAY	0.312	-	-	-	0.1	0.12	0.937	0.937	0.937	0.744	1
1075	DURCHDEWALD_SKIN_CARCINOGENESIS_UP	0.312	-	-	-	0.1	0.12	0.937	0.937	0.937	0.745	1
1076	MAPKKK_CASCADE_GO_0000165	0.312	-	-	-	<0.1	0.12	0.937	0.937	0.937	0.745	1
1077	PANGAS_TUMOR_SUPPRESSION_BY_SMAD1_AND_SMAD5_DN	0.312	-	-	-	<0.1	0.12	0.937	0.937	0.937	0.745	1
1078	REACTOME_SYNTHESIS_OF_SUBSTRATES_IN_N_GLYCAN_BIOSYTHESIS	0.312	-	-	-	0.2	0.12	0.938	0.938	0.938	0.746	1
1079	GLUTAMATE_SIGNALING_PATHWAY	0.312	-	-	-	<0.1	0.12	0.938	0.938	0.938	0.747	1
1080	CARBOXY_LYASE_ACTIVITY	0.312	-	-	-	0.3	0.12	0.938	0.938	0.938	0.747	1
1081	VITAMIN_METABOLIC_PROCESS	0.312	-	-	-	0.3	0.12	0.938	0.938	0.938	0.747	1
1082	CARBON_CARBON_LYASE_ACTIVITY	0.311	-	-	-	0.3	0.121	0.938	0.938	0.938	0.748	1
1083	REACTOME_PKB_MEDIATED_EVENTS	0.311	-	-	-	0.3	0.121	0.938	0.938	0.938	0.748	1
1084	REACTOME_CDT1_ASSOCIATION_WITH_THE_CDC6_ORC_ORIGIN_COMPLEX	0.311	-	-	-	0.1	0.121	0.938	0.938	0.938	0.748	1
1085	CROMER_METASTASIS_UP	0.311	-	-	-	0.2	0.121	0.938	0.938	0.938	0.749	1
1086	LASTOWSKA_NEUROBLASTOMA_COPY_NUMBER_DN	0.311	-	-	-	0.5	0.121	0.938	0.938	0.938	0.75	1
1087	BROWNE_HCMV_INFECTION_1HR_UP	0.311	-	-	-	0.3	0.121	0.938	0.938	0.938	0.75	1
1088	REACTOME_RNA_POL_I_TRANSCRIPTION_INITIATION	0.311	-	-	-	0.2	0.122	0.938	0.938	0.938	0.75	1
1089	NAGY_PCAF_COMPONENTS_HUMAN	0.311	-	-	-	0.2	0.122	0.938	0.938	0.938	0.752	1
1090	ESC_J1_UP_EARLY.V1	0.311	-	-	-	0.1	0.122	0.938	0.938	0.938	0.752	1
1091	HOFMANN_MYELODYSPLASTIC_SYNDROM_RISK	0.311	-	-	-	0.2	0.122	0.938	0.938	0.938	0.752	1
1092	V$E2F_Q4_01	0.311	-	-	-	0.2	0.122	0.938	0.938	0.938	0.752	1
1093	CHIANG_LIVER_CANCER_SUBCLASS_CTNNB1	0.31	-	-	-	<0.1	0.122	0.938	0.938	0.938	0.752	1
1094	LIPOPROTEIN_BINDING	0.31	-	-	-	0.1	0.122	0.938	0.938	0.938	0.752	1
1095	V$LEF1_Q6	0.31	-	-	-	<0.1	0.122	0.938	0.938	0.938	0.753	1
1096	NEUROTRANSMITTER_SECRETION	0.31	-	-	-	0.1	0.122	0.938	0.938	0.938	0.753	1
1097	SA_G1_AND_S_PHASES	0.31	-	-	-	<0.1	0.122	0.938	0.938	0.938	0.753	1
1098	REACTOME_ORC1_REMOVAL_FROM_CHROMATIN	0.31	-	-	-	0.1	0.123	0.938	0.938	0.938	0.754	1
1099	ZEMBUTSU_SENSITIVITY_TO_FLUOROURACIL	0.31	-	-	-	0.2	0.123	0.938	0.938	0.938	0.754	1
1100	YANG_BCL3_TARGETS_DN	0.31	-	-	-	0.3	0.123	0.938	0.938	0.938	0.754	1
1101	CHEOK_RESPONSE_TO_MERCAPTOPURINE_AND_HD_MTX_UP	0.31	-	-	-	0.1	0.123	0.938	0.938	0.938	0.754	1
1102	CREIGHTON_AKT1_SIGNALING_VIA_MTOR	0.31	-	-	-	<0.1	0.123	0.938	0.938	0.938	0.754	1
1103	V$TAXCREB_02	0.31	-	-	-	0.1	0.123	0.938	0.938	0.938	0.754	1
1104	STRUCTURAL_CONSTITUENT_OF_MUSCLE	0.31	-	-	-	0.2	0.123	0.938	0.938	0.938	0.755	1
1105	PAL_PRMT5_TARGETS	0.31	-	-	-	0.2	0.123	0.938	0.938	0.938	0.755	1
1106	CRX_DN.V1_UP (19q13.3)	0.31	-	-	-	<0.1	0.123	0.938	0.938	0.938	0.755	1
1107	HU_GENOTOXIN_ACTION_DIRECT_VS_INDIRECT_24HR	0.309	-	-	-	0.1	0.124	0.939	0.939	0.939	0.757	1
1108	RNA_DEPENDENT_ATPASE_ACTIVITY	0.309	-	-	-	0.2	0.124	0.939	0.939	0.939	0.757	1
1109	NEGATIVE_REGULATION_OF_TRANSLATION	0.309	-	-	-	0.1	0.124	0.939	0.939	0.939	0.757	1
1110	REACTOME_TERMINATION_OF_O_GLYCAN_BIOSYNTHESIS	0.309	-	-	-	0.1	0.124	0.939	0.939	0.939	0.757	1
1111	V$MEIS1AHOXA9_01	0.309	-	-	-	0.1	0.124	0.939	0.939	0.939	0.758	1
1112	SANDERSON_PPARA_TARGETS	0.309	-	-	-	0.3	0.124	0.939	0.939	0.939	0.759	1
1113	WANG_RESPONSE_TO_ANDROGEN_UP	0.309	-	-	-	0.3	0.125	0.939	0.939	0.939	0.759	1
1114	SPIELMAN_LYMPHOBLAST_EUROPEAN_VS_ASIAN_2FC	0.309	-	-	-	0.1	0.125	0.939	0.939	0.939	0.759	1
1115	TGFB_UP.V1_DN	0.309	-	-	-	0.1	0.125	0.939	0.939	0.939	0.759	1
1116	REACTOME_LAGGING_STRAND_SYNTHESIS	0.309	-	-	-	0.1	0.125	0.939	0.939	0.939	0.759	1
1117	LIU_CMYB_TARGETS	0.309	-	-	-	0.2	0.125	0.94	0.94	0.94	0.76	1
1118	SHANK_TAL1_TARGETS_DN	0.309	-	-	-	<0.1	0.125	0.94	0.94	0.94	0.76	1
1119	BARRIER_CANCER_RELAPSE_NORMAL_SAMPLE	0.309	-	-	-	<0.1	0.125	0.941	0.941	0.941	0.76	1
1120	CEBALLOS_TARGETS_OF_TP53_AND_MYC	0.308	-	-	-	0.2	0.125	0.942	0.942	0.942	0.761	1
1121	CYTOPLASMIC_VESICLE	0.308	-	-	-	<0.1	0.126	0.942	0.942	0.942	0.762	1
1122	GOERING_BLOOD_HDL_CHOLESTEROL_QTL_TRANS	0.308	-	-	-	0.2	0.126	0.942	0.942	0.942	0.763	1
1123	JAZAERI_BREAST_CANCER_BRCA1_VS_BRCA2_UP	0.308	-	-	-	0.2	0.126	0.942	0.942	0.942	0.763	1
1124	PROTEIN_SERINE_THREONINE_KINASE_ACTIVITY	0.308	-	-	-	0.1	0.126	0.942	0.942	0.942	0.763	1
1125	LEIN_LOCALIZED_TO_PROXIMAL_DENDRITES	0.308	-	-	-	0.2	0.126	0.944	0.944	0.944	0.764	1
1126	ROME_INSULIN_TARGETS_IN_MUSCLE_DN	0.308	-	-	-	0.1	0.126	0.944	0.944	0.944	0.764	1
1127	MIKKELSEN_ES_HCP_WITH_H3K27ME3	0.308	-	-	-	0.1	0.126	0.944	0.944	0.944	0.764	1
1128	HEIDENBLAD_AMPLIFIED_IN_BONE_CANCER	0.307	-	-	-	0.2	0.127	0.948	0.948	0.948	0.766	1
1129	BIOCARTA_TALL1_PATHWAY	0.307	-	-	-	0.2	0.127	0.949	0.949	0.949	0.767	1
1130	KEGG_PROGESTERONE_MEDIATED_OOCYTE_MATURATION	0.307	-	-	-	0.1	0.128	0.949	0.949	0.949	0.767	1
1131	SYNAPTIC_VESICLE	0.307	-	-	-	0.1	0.128	0.949	0.949	0.949	0.767	1
1132	V$P300_01	0.307	-	-	-	<0.1	0.128	0.949	0.949	0.949	0.767	1
1133	ANTIPORTER_ACTIVITY	0.307	-	-	-	0.1	0.128	0.949	0.949	0.949	0.768	1
1134	NIELSEN_LEIOMYOSARCOMA_CNN1	0.307	-	-	-	0.3	0.128	0.949	0.949	0.949	0.768	1
1135	KEGG_INSULIN_SIGNALING_PATHWAY	0.307	-	-	-	<0.1	0.128	0.949	0.949	0.949	0.769	1
1136	WANG_CISPLATIN_RESPONSE_AND_XPC	0.307	-	-	-	<0.1	0.128	0.949	0.949	0.949	0.769	1
1137	LIPID_KINASE_ACTIVITY	0.307	-	-	-	0.6	0.129	0.949	0.949	0.949	0.769	1
1138	TONKS_TARGETS_OF_RUNX1_RUNX1T1_FUSION_SUSTAINED_IN_MONOCYTE	0.306	-	-	-	0.1	0.129	0.949	0.949	0.949	0.769	1
1139	BRACHAT_RESPONSE_TO_CAMPTOTHECIN_UP	0.306	-	-	-	<0.1	0.129	0.949	0.949	0.949	0.769	1
1140	RIZ_ERYTHROID_DIFFERENTIATION_HEMGN	0.306	-	-	-	<0.1	0.129	0.949	0.949	0.949	0.769	1
1141	WANG_CLASSIC_ADIPOGENIC_TARGETS_OF_PPARG	0.306	-	-	-	0.1	0.129	0.949	0.949	0.949	0.77	1
1142	LIU_IL13_MEMORY_MODEL_UP	0.306	-	-	-	0.2	0.129	0.949	0.949	0.949	0.771	1
1143	MIKKELSEN_IPS_ICP_WITH_H3K4ME3_AND_H327ME3	0.306	-	-	-	0.1	0.129	0.949	0.949	0.949	0.771	1
1144	AAGWWRNYGGC_UNKNOWN	0.306	-	-	-	0.1	0.129	0.949	0.949	0.949	0.771	1
1145	POSITIVE_REGULATION_OF_CYTOKINE_SECRETION	0.306	-	-	-	0.2	0.129	0.949	0.949	0.949	0.771	1
1146	VESICLE	0.306	-	-	-	0.1	0.129	0.949	0.949	0.949	0.771	1
1147	PROTEIN_MODIFICATION_BY_SMALL_PROTEIN_CONJUGATION	0.306	-	-	-	0.1	0.13	0.949	0.949	0.949	0.772	1
1148	V$MEF2_04	0.306	-	-	-	0.3	0.13	0.949	0.949	0.949	0.772	1
1149	VOLTAGE_GATED_POTASSIUM_CHANNEL_ACTIVITY	0.306	-	-	-	<0.1	0.13	0.949	0.949	0.949	0.772	1
1150	MARSHALL_VIRAL_INFECTION_RESPONSE	0.306	-	-	-	0.2	0.13	0.949	0.949	0.949	0.774	1
1151	NUCLEOLAR_PART	0.305	-	-	-	0.4	0.13	0.949	0.949	0.949	0.774	1
1152	TURASHVILI_BREAST_DUCTAL_CARCINOMA_VS_DUCTAL_NORMAL	0.305	-	-	-	0.3	0.13	0.949	0.949	0.949	0.774	1
1153	REACTOME_GLUCOSE_METABOLISM	0.305	-	-	-	0.1	0.131	0.949	0.949	0.949	0.774	1
1154	POSITIVE_REGULATION_OF_PROTEIN_SECRETION	0.305	-	-	-	0.2	0.131	0.949	0.949	0.949	0.775	1
1155	PRC2_SUZ12_UP.V1	0.305	-	-	-	0.1	0.131	0.949	0.949	0.949	0.775	1
1156	REACTOME_REGULATION_OF_ORNITHINE_DECARBOXYLASE_ODC	0.305	-	-	-	0.1	0.131	0.949	0.949	0.949	0.775	1
1157	RORIE_TARGETS_OF_EWSR1_FLI1_FUSION_DN	0.305	-	-	-	0.1	0.131	0.949	0.949	0.949	0.775	1
1158	BOYLAN_MULTIPLE_MYELOMA_C_CLUSTER_UP	0.305	-	-	-	0.3	0.131	0.949	0.949	0.949	0.776	1
1159	DODD_NASOPHARYNGEAL_CARCINOMA_UP	0.305	-	-	-	<0.1	0.131	0.949	0.949	0.949	0.776	1
1160	PROTEIN_UBIQUITINATION	0.305	-	-	-	0.1	0.131	0.949	0.949	0.949	0.776	1
1161	DORN_ADENOVIRUS_INFECTION_48HR	0.305	-	-	-	<0.1	0.131	0.949	0.949	0.949	0.776	1
1162	GLYCEROPHOSPHOLIPID_METABOLIC_PROCESS	0.305	-	-	-	0.1	0.132	0.949	0.949	0.949	0.777	1
1163	V$CEBPA_01	0.305	-	-	-	0.2	0.132	0.949	0.949	0.949	0.777	1
1164	TONKS_TARGETS_OF_RUNX1_RUNX1T1_FUSION_HSC	0.305	-	-	-	0.3	0.132	0.949	0.949	0.949	0.778	1
1165	BLALOCK_ALZHEIMERS_DISEASE_INCIPIENT_DN	0.305	-	-	-	<0.1	0.132	0.949	0.949	0.949	0.778	1
1166	MOREAUX_MULTIPLE_MYELOMA_BY_TACI	0.304	-	-	-	<0.1	0.132	0.949	0.949	0.949	0.778	1
1167	GCCATNTTG_V$YY1_Q6	0.304	-	-	-	<0.1	0.132	0.949	0.949	0.949	0.778	1
1168	MAGNESIUM_ION_BINDING	0.304	-	-	-	0.2	0.132	0.949	0.949	0.949	0.778	1
1169	HEDENFALK_BREAST_CANCER_BRACX	0.304	-	-	-	0.2	0.132	0.949	0.949	0.949	0.778	1
1170	LEIN_NEURON_MARKERS	0.304	-	-	-	<0.1	0.132	0.949	0.949	0.949	0.778	1
1171	REACTOME_SIGNALING_BY_NOTCH2	0.304	-	-	-	0.3	0.132	0.949	0.949	0.949	0.778	1
1172	REACTOME_REGULATION_OF_PYRUVATE_DEHYDROGENASE_PDH_COMPLEX	0.304	-	-	-	0.2	0.132	0.949	0.949	0.949	0.778	1
1173	KAAB_FAILED_HEART_ATRIUM	0.304	-	-	-	0.1	0.132	0.949	0.949	0.949	0.779	1
1174	BROWNE_HCMV_INFECTION_1HR	0.304	-	-	-	0.3	0.132	0.949	0.949	0.949	0.779	1
1175	V$CEBP_Q3	0.304	-	-	-	0.1	0.133	0.949	0.949	0.949	0.78	1
1176	KEGG_RIBOFLAVIN_METABOLISM	0.304	-	-	-	0.3	0.133	0.949	0.949	0.949	0.781	1
1177	ISHIDA_TARGETS_OF_SYT_SSX_FUSIONS	0.304	-	-	-	0.1	0.133	0.949	0.949	0.949	0.781	1
1178	MICROTUBULE_BASED_MOVEMENT	0.304	-	-	-	<0.1	0.133	0.949	0.949	0.949	0.781	1
1179	SHEPARD_CRUSH_AND_BURN_MUTANT_DN	0.304	-	-	-	<0.1	0.133	0.949	0.949	0.949	0.782	1
1180	CAGCCTC,MIR-485-5P	0.304	-	-	-	<0.1	0.133	0.949	0.949	0.949	0.782	1
1181	LIPASE_ACTIVITY	0.304	-	-	-	0.3	0.133	0.949	0.949	0.949	0.782	1
1182	MATZUK_MATERNAL_EFFECT	0.304	-	-	-	0.1	0.133	0.949	0.949	0.949	0.782	1
1183	GROSS_HYPOXIA_VIA_HIF1A_UP	0.304	-	-	-	0.3	0.133	0.949	0.949	0.949	0.782	1
1184	V$FXR_IR1_Q6	0.303	-	-	-	0.2	0.134	0.951	0.951	0.951	0.783	1
1185	BIOCARTA_AKAPCENTROSOME_PATHWAY	0.303	-	-	-	0.2	0.134	0.951	0.951	0.951	0.784	1
1186	REACTOME_CHONDROITIN_SULFATE_DERMATAN_SULFATE_METABOLISM	0.303	-	-	-	0.2	0.134	0.951	0.951	0.951	0.784	1
1187	CHYLA_CBFA2T3_TARGETS_DN	0.303	-	-	-	<0.1	0.134	0.951	0.951	0.951	0.784	1
1188	REACTOME_CYTOSOLIC_TRNA_AMINOACYLATION	0.303	-	-	-	0.3	0.135	0.951	0.951	0.951	0.785	1
1189	MEMBRANE_BOUND_VESICLE	0.303	-	-	-	<0.1	0.135	0.951	0.951	0.951	0.785	1
1190	HOFMANN_MYELODYSPLASTIC_SYNDROM_HIGH_RISK	0.303	-	-	-	<0.1	0.135	0.951	0.951	0.951	0.785	1
1191	KEGG_VASOPRESSIN_REGULATED_WATER_REABSORPTION	0.303	-	-	-	<0.1	0.135	0.951	0.951	0.951	0.786	1
1192	KIM_MYCL1_AMPLIFICATION_TARGETS_DN	0.303	-	-	-	0.3	0.135	0.951	0.951	0.951	0.787	1
1193	V$SP1_Q6	0.303	-	-	-	<0.1	0.135	0.951	0.951	0.951	0.787	1
1194	FRASOR_RESPONSE_TO_ESTRADIOL_DN	0.303	-	-	-	0.2	0.135	0.951	0.951	0.951	0.787	1
1195	DEOXYRIBONUCLEASE_ACTIVITY	0.303	-	-	-	0.5	0.135	0.951	0.951	0.951	0.787	1
1196	SENSORY_PERCEPTION_OF_CHEMICAL_STIMULUS	0.303	-	-	-	<0.1	0.135	0.951	0.951	0.951	0.787	1
1197	UEDA_CENTRAL_CLOCK	0.302	-	-	-	0.2	0.136	0.953	0.953	0.953	0.788	1
1198	LIU_TOPBP1_TARGETS	0.302	-	-	-	<0.1	0.136	0.953	0.953	0.953	0.788	1
1199	IGARASHI_ATF4_TARGETS_DN	0.302	-	-	-	0.1	0.136	0.953	0.953	0.953	0.788	1
1200	GOLGI_VESICLE_TRANSPORT	0.302	-	-	-	0.3	0.136	0.953	0.953	0.953	0.788	1
1201	REACTOME_RAP1_SIGNALLING	0.302	-	-	-	<0.1	0.136	0.954	0.954	0.954	0.789	1
1202	CREIGHTON_ENDOCRINE_THERAPY_RESISTANCE_2	0.302	-	-	-	0.2	0.136	0.954	0.954	0.954	0.789	1
1203	TCANNTGAY_V$SREBP1_01	0.302	-	-	-	0.2	0.137	0.954	0.954	0.954	0.79	1
1204	V$E2F_02	0.302	-	-	-	0.3	0.137	0.954	0.954	0.954	0.79	1
1205	CHANG_POU5F1_TARGETS_UP	0.302	-	-	-	0.1	0.137	0.954	0.954	0.954	0.79	1
1206	JU_AGING_TERC_TARGETS_DN	0.302	-	-	-	0.1	0.137	0.954	0.954	0.954	0.79	1
1207	MANTOVANI_NFKB_TARGETS_DN	0.301	-	-	-	0.3	0.137	0.955	0.955	0.955	0.791	1
1208	TIEN_INTESTINE_PROBIOTICS_2HR	0.301	-	-	-	0.1	0.138	0.957	0.957	0.957	0.793	1
1209	POMEROY_MEDULLOBLASTOMA_PROGNOSIS	0.301	-	-	-	0.2	0.138	0.957	0.957	0.957	0.794	1
1210	REACTOME_BIOLOGICAL_OXIDATIONS	0.301	-	-	-	0.1	0.138	0.957	0.957	0.957	0.794	1
1211	WAMUNYOKOLI_OVARIAN_CANCER_LMP_UP	0.301	-	-	-	<0.1	0.138	0.957	0.957	0.957	0.794	1
1212	PROTEIN_METHYLTRANSFERASE_ACTIVITY	0.301	-	-	-	0.2	0.138	0.957	0.957	0.957	0.794	1
1213	V$HNF1_Q6	0.301	-	-	-	0.1	0.138	0.957	0.957	0.957	0.795	1
1214	CYTOPLASMIC_MEMBRANE_BOUND_VESICLE	0.301	-	-	-	<0.1	0.138	0.957	0.957	0.957	0.795	1
1215	MANTOVANI_VIRAL_GPCR_SIGNALING	0.301	-	-	-	0.1	0.138	0.957	0.957	0.957	0.795	1
1216	NIKOLSKY_BREAST_CANCER_16Q24_AMPLICON	0.301	-	-	-	0.2	0.138	0.957	0.957	0.957	0.795	1
1217	LIM_MAMMARY_STEM_CELL_DN	0.301	-	-	-	0.1	0.138	0.957	0.957	0.957	0.795	1
1218	REACTOME_DNA_STRAND_ELONGATION	0.301	-	-	-	0.1	0.138	0.957	0.957	0.957	0.795	1
1219	YAMASHITA_LIVER_CANCER_WITH_EPCAM_DN	0.301	-	-	-	<0.1	0.139	0.959	0.959	0.959	0.796	1
1220	PIGMENT_METABOLIC_PROCESS	0.3	-	-	-	0.4	0.139	0.959	0.959	0.959	0.796	1
1221	GLUCOSE_CATABOLIC_PROCESS	0.3	-	-	-	0.3	0.139	0.959	0.959	0.959	0.797	1
1222	V$HNF3ALPHA_Q6	0.3	-	-	-	0.1	0.139	0.959	0.959	0.959	0.797	1
1223	TSENG_IRS1_TARGETS	0.3	-	-	-	<0.1	0.139	0.959	0.959	0.959	0.797	1
1224	HOMOPHILIC_CELL_ADHESION	0.3	-	-	-	0.1	0.14	0.959	0.959	0.959	0.797	1
1225	MONOOXYGENASE_ACTIVITY	0.3	-	-	-	<0.1	0.14	0.959	0.959	0.959	0.797	1
1226	CATION_CHANNEL_ACTIVITY	0.3	-	-	-	<0.1	0.14	0.959	0.959	0.959	0.798	1
1227	KOBAYASHI_EGFR_SIGNALING_6HR	0.3	-	-	-	<0.1	0.14	0.959	0.959	0.959	0.798	1
1228	HYDROGEN_ION_TRANSMEMBRANE_TRANSPORTER_ACTIVITY	0.3	-	-	-	0.2	0.14	0.959	0.959	0.959	0.799	1
1229	OUTER_MEMBRANE	0.3	-	-	-	0.1	0.14	0.959	0.959	0.959	0.799	1
1230	GAUSSMANN_MLL_AF4_FUSION_TARGETS_E_DN	0.3	-	-	-	0.4	0.14	0.959	0.959	0.959	0.799	1
1231	YNTTTNNNANGCARM_UNKNOWN	0.3	-	-	-	<0.1	0.14	0.959	0.959	0.959	0.799	1
1232	AMINO_ACID_METABOLIC_PROCESS	0.3	-	-	-	0.3	0.14	0.959	0.959	0.959	0.799	1
1233	MEISSNER_BRAIN_HCP_WITH_H3K4ME2_AND_H3K27ME3	0.3	-	-	-	<0.1	0.141	0.959	0.959	0.959	0.799	1
1234	LOPEZ_MESOTHELIOMA_SURVIVAL_OVERALL	0.3	-	-	-	0.2	0.141	0.959	0.959	0.959	0.8	1
1235	CTGYNNCTYTAA_UNKNOWN	0.3	-	-	-	0.1	0.141	0.959	0.959	0.959	0.8	1
1236	CHANG_IMMORTALIZED_BY_HPV31	0.299	-	-	-	0.2	0.141	0.959	0.959	0.959	0.8	1
1237	SIG_CD40PATHWAYMAP	0.299	-	-	-	0.3	0.141	0.96	0.96	0.96	0.801	1
1238	CAFFAREL_RESPONSE_TO_THC_24HR_3_DN	0.299	-	-	-	0.1	0.141	0.96	0.96	0.96	0.801	1
1239	HERNANDEZ_ABERRANT_MITOSIS_BY_DOCETACEL_2NM_DN	0.299	-	-	-	0.2	0.141	0.96	0.96	0.96	0.802	1
1240	TASTE_RECEPTOR_ACTIVITY	0.299	-	-	-	0.3	0.142	0.96	0.96	0.96	0.803	1
1241	WANG_METASTASIS_OF_BREAST_CANCER_ESR1_UP	0.299	-	-	-	0.2	0.142	0.96	0.96	0.96	0.804	1
1242	TGACCTTG_V$SF1_Q6	0.299	-	-	-	0.1	0.142	0.96	0.96	0.96	0.804	1
1243	ITO_PTTG1_TARGETS	0.299	-	-	-	0.1	0.142	0.96	0.96	0.96	0.804	1
1244	CELL_RECOGNITION	0.298	-	-	-	0.2	0.143	0.96	0.96	0.96	0.805	1
1245	AGCGCTT,MIR-518F,MIR-518E,MIR-518A	0.298	-	-	-	0.2	0.143	0.96	0.96	0.96	0.806	1
1246	LYSOSOMAL_MEMBRANE	0.298	-	-	-	0.2	0.143	0.96	0.96	0.96	0.806	1
1247	CELLULAR_RESPONSE_TO_STIMULUS	0.298	-	-	-	0.1	0.143	0.96	0.96	0.96	0.806	1
1248	SHIN_B_CELL_LYMPHOMA_CLUSTER_2	0.298	-	-	-	0.4	0.143	0.96	0.96	0.96	0.806	1
1249	REACTOME_P53_INDEPENDENT_G1_S_DNA_DAMAGE_CHECKPOINT	0.298	-	-	-	0.2	0.143	0.96	0.96	0.96	0.806	1
1250	GGTGTGT,MIR-329	0.298	-	-	-	0.1	0.143	0.96	0.96	0.96	0.807	1
1251	REGULATION_OF_PROTEIN_SECRETION	0.298	-	-	-	0.3	0.143	0.96	0.96	0.96	0.807	1
1252	MACROMOLECULE_CATABOLIC_PROCESS	0.298	-	-	-	0.3	0.143	0.96	0.96	0.96	0.807	1
1253	KEGG_TYROSINE_METABOLISM	0.298	-	-	-	<0.1	0.144	0.96	0.96	0.96	0.807	1
1254	SU_TESTIS	0.298	-	-	-	0.2	0.144	0.96	0.96	0.96	0.808	1
1255	MGGAAGTG_V$GABP_B	0.298	-	-	-	0.1	0.144	0.96	0.96	0.96	0.808	1
1256	BOYAULT_LIVER_CANCER_SUBCLASS_G3_DN	0.298	-	-	-	<0.1	0.144	0.96	0.96	0.96	0.808	1
1257	SECONDARY_METABOLIC_PROCESS	0.298	-	-	-	0.4	0.144	0.96	0.96	0.96	0.808	1
1258	V$OCT1_B	0.298	-	-	-	<0.1	0.144	0.96	0.96	0.96	0.808	1
1259	HOFMANN_MYELODYSPLASTIC_SYNDROM_HIGH_RISK_UP	0.298	-	-	-	0.1	0.144	0.96	0.96	0.96	0.809	1
1260	SWEET_LUNG_CANCER_KRAS	0.298	-	-	-	0.3	0.144	0.96	0.96	0.96	0.809	1
1261	ATPASE_ACTIVITY_COUPLED_TO_TRANSMEMBRANE_MOVEMENT_OF_IONS	0.297	-	-	-	<0.1	0.144	0.96	0.96	0.96	0.81	1
1262	NABA_ECM_AFFILIATED	0.297	-	-	-	0.1	0.144	0.96	0.96	0.96	0.81	1
1263	RODRIGUES_DCC_TARGETS	0.297	-	-	-	0.3	0.144	0.96	0.96	0.96	0.81	1
1264	GATAAGR_V$GATA_C	0.297	-	-	-	0.1	0.145	0.96	0.96	0.96	0.81	1
1265	HOSHIDA_LIVER_CANCER_SUBCLASS_S3	0.297	-	-	-	0.3	0.145	0.96	0.96	0.96	0.81	1
1266	SYNAPTIC_TRANSMISSION	0.297	-	-	-	0.1	0.145	0.96	0.96	0.96	0.811	1
1267	IWANAGA_E2F1_TARGETS_NOT_INDUCED_BY_SERUM	0.297	-	-	-	0.1	0.145	0.96	0.96	0.96	0.811	1
1268	BYSTROEM_CORRELATED_WITH_IL5_UP	0.297	-	-	-	0.2	0.145	0.96	0.96	0.96	0.811	1
1269	BROWNE_HCMV_INFECTION_1HR_DN	0.297	-	-	-	0.4	0.145	0.96	0.96	0.96	0.811	1
1270	KEGG_GLYCEROPHOSPHOLIPID_METABOLISM	0.297	-	-	-	0.4	0.145	0.96	0.96	0.96	0.811	1
1271	NIELSEN_LIPOSARCOMA_DN	0.297	-	-	-	0.2	0.145	0.96	0.96	0.96	0.811	1
1272	N_ACETYLTRANSFERASE_ACTIVITY	0.297	-	-	-	<0.1	0.145	0.96	0.96	0.96	0.812	1
1273	TRANSCRIPTION_COFACTOR_ACTIVITY	0.297	-	-	-	<0.1	0.145	0.96	0.96	0.96	0.812	1
1274	V$OCT1_Q5_01	0.297	-	-	-	<0.1	0.146	0.96	0.96	0.96	0.812	1
1275	GCNP_SHH_UP_LATE.V1	0.296	-	-	-	0.2	0.146	0.96	0.96	0.96	0.813	1
1276	HORMONE_ACTIVITY	0.296	-	-	-	0.3	0.146	0.96	0.96	0.96	0.813	1
1277	REACTOME_DOWNSTREAM_SIGNALING_EVENTS_OF_B_CELL_RECEPTOR_BCR	0.296	-	-	-	0.1	0.146	0.96	0.96	0.96	0.813	1
1278	OXFORD_RALA_OR_RALB_TARGETS	0.296	-	-	-	0.1	0.146	0.96	0.96	0.96	0.814	1
1279	MITOCHONDRIAL_RESPIRATORY_CHAIN	0.296	-	-	-	0.2	0.146	0.96	0.96	0.96	0.814	1
1280	INTEGRAL_TO_ORGANELLE_MEMBRANE	0.296	-	-	-	0.5	0.146	0.96	0.96	0.96	0.814	1
1281	CUI_TCF21_TARGETS_2_UP	0.296	-	-	-	<0.1	0.146	0.96	0.96	0.96	0.814	1
1282	E2F1_UP.V1 (20q11)	0.296	-	-	-	0.1	0.147	0.96	0.96	0.96	0.814	1
1283	JAATINEN_HEMATOPOIETIC_STEM_CELL	0.296	-	-	-	0.1	0.147	0.96	0.96	0.96	0.814	1
1284	REACTOME_POTASSIUM_CHANNELS	0.296	-	-	-	<0.1	0.147	0.96	0.96	0.96	0.816	1
1285	TRANSMISSION_OF_NERVE_IMPULSE	0.296	-	-	-	0.1	0.147	0.96	0.96	0.96	0.816	1
1286	ZHANG_RESPONSE_TO_IKK_INHIBITOR_AND_TNF_DN	0.296	-	-	-	<0.1	0.147	0.96	0.96	0.96	0.816	1
1287	HALLMARK_OXIDATIVE_PHOSPHORYLATION	0.296	-	-	-	0.3	0.147	0.96	0.96	0.96	0.816	1
1288	BYSTROEM_CORRELATED_WITH_IL5	0.296	-	-	-	0.4	0.147	0.96	0.96	0.96	0.816	1
1289	PROTEIN_AMINO_ACID_ADP_RIBOSYLATION	0.296	-	-	-	0.2	0.147	0.96	0.96	0.96	0.816	1
1290	ACTIN_FILAMENT_BASED_PROCESS	0.296	-	-	-	0.1	0.147	0.96	0.96	0.96	0.816	1
1291	PHOTORECEPTOR_CELL_MAINTENANCE	0.296	-	-	-	<0.1	0.147	0.96	0.96	0.96	0.816	1
1292	ATP_DEPENDENT_RNA_HELICASE_ACTIVITY	0.296	-	-	-	0.2	0.147	0.96	0.96	0.96	0.816	1
1293	WIKMAN_ASBESTOS_LUNG_CANCER_DN	0.296	-	-	-	0.2	0.148	0.96	0.96	0.96	0.817	1
1294	SYSTEM_PROCESS	0.295	-	-	-	0.1	0.148	0.961	0.961	0.961	0.818	1
1295	RAS_PROTEIN_SIGNAL_TRANSDUCTION	0.295	-	-	-	<0.1	0.148	0.961	0.961	0.961	0.818	1
1296	ASGHARZADEH_NEUROBLASTOMA_POOR_SURVIVAL_DN	0.295	-	-	-	0.1	0.148	0.961	0.961	0.961	0.818	1
1297	REACTOME_SCF_BETA_TRCP_MEDIATED_DEGRADATION_OF_EMI1	0.295	-	-	-	0.1	0.148	0.961	0.961	0.961	0.819	1
1298	DNA_PACKAGING	0.295	-	-	-	<0.1	0.148	0.961	0.961	0.961	0.819	1
1299	RODRIGUES_THYROID_CARCINOMA_UP	0.295	-	-	-	0.4	0.148	0.961	0.961	0.961	0.819	1
1300	YGCANTGCR_UNKNOWN	0.295	-	-	-	<0.1	0.148	0.961	0.961	0.961	0.819	1
1301	WAKABAYASHI_ADIPOGENESIS_PPARG_RXRA_BOUND_8D	0.295	-	-	-	0.2	0.149	0.962	0.962	0.962	0.819	1
1302	LU_TUMOR_ENDOTHELIAL_MARKERS_DN	0.295	-	-	-	<0.1	0.149	0.962	0.962	0.962	0.819	1
1303	NAKAMURA_ADIPOGENESIS_EARLY	0.295	-	-	-	0.3	0.149	0.962	0.962	0.962	0.819	1
1304	DORSAM_HOXA9_TARGETS_DN	0.295	-	-	-	0.2	0.149	0.962	0.962	0.962	0.819	1
1305	REACTOME_SIGNALING_BY_ERBB4	0.295	-	-	-	0.2	0.149	0.962	0.962	0.962	0.82	1
1306	REACTOME_ACYL_CHAIN_REMODELLING_OF_PG	0.295	-	-	-	0.3	0.149	0.963	0.963	0.963	0.82	1
1307	HYDROLASE_ACTIVITY_ACTING_ON_CARBON_NITROGEN_NOT_PEPTIDEBONDSIN_LINEAR_AMIDES	0.295	-	-	-	0.3	0.149	0.963	0.963	0.963	0.82	1
1308	REACTOME_CDK_MEDIATED_PHOSPHORYLATION_AND_REMOVAL_OF_CDC6	0.294	-	-	-	0.1	0.15	0.963	0.963	0.963	0.821	1
1309	STEROID_METABOLIC_PROCESS	0.294	-	-	-	0.1	0.15	0.963	0.963	0.963	0.822	1
1310	LEE_AGING_NEOCORTEX_DN	0.294	-	-	-	0.3	0.15	0.963	0.963	0.963	0.822	1
1311	U12_DEPENDENT_SPLICEOSOME	0.294	-	-	-	0.3	0.15	0.964	0.964	0.964	0.822	1
1312	MONNIER_POSTRADIATION_TUMOR_ESCAPE	0.294	-	-	-	0.1	0.15	0.964	0.964	0.964	0.822	1
1313	ATGTACA,MIR-493	0.294	-	-	-	0.1	0.151	0.964	0.964	0.964	0.823	1
1314	RESPONSE_TO_EXTRACELLULAR_STIMULUS	0.294	-	-	-	0.1	0.151	0.964	0.964	0.964	0.823	1
1315	AGTCAGC,MIR-345	0.294	-	-	-	0.2	0.151	0.964	0.964	0.964	0.823	1
1316	ATCMNTCCGY_UNKNOWN	0.294	-	-	-	0.1	0.151	0.964	0.964	0.964	0.823	1
1317	V$ERR1_Q2	0.294	-	-	-	0.1	0.151	0.964	0.964	0.964	0.824	1
1318	ANION_CHANNEL_ACTIVITY	0.294	-	-	-	0.1	0.151	0.964	0.964	0.964	0.824	1
1319	DEN_INTERACT_WITH_LCA5	0.294	-	-	-	0.2	0.151	0.964	0.964	0.964	0.824	1
1320	PUJANA_BREAST_CANCER_LIT_INT_NETWORK	0.294	-	-	-	0.2	0.151	0.964	0.964	0.964	0.824	1
1321	RODRIGUES_DCC_TARGETS_UP	0.294	-	-	-	0.2	0.151	0.964	0.964	0.964	0.825	1
1322	KERLEY_RESPONSE_TO_CISPLATIN_DN	0.293	-	-	-	0.1	0.152	0.968	0.968	0.968	0.827	1
1323	V$CEBP_Q2_01	0.293	-	-	-	0.1	0.152	0.968	0.968	0.968	0.827	1
1324	CCTGTGA,MIR-513	0.293	-	-	-	<0.1	0.152	0.968	0.968	0.968	0.827	1
1325	REACTOME_SIGNALING_BY_EGFR_IN_CANCER	0.293	-	-	-	0.3	0.153	0.968	0.968	0.968	0.827	1
1326	STEIN_ESRRA_TARGETS_UP	0.293	-	-	-	0.5	0.153	0.968	0.968	0.968	0.827	1
1327	PEREZ_TP53_AND_TP63_TARGETS	0.293	-	-	-	<0.1	0.153	0.968	0.968	0.968	0.827	1
1328	MULLIGHAN_MLL_SIGNATURE_2	0.293	-	-	-	0.2	0.153	0.968	0.968	0.968	0.828	1
1329	GAL_LEUKEMIC_STEM_CELL (11q13.2)	0.293	-	-	-	0.1	0.153	0.968	0.968	0.968	0.828	1
1330	DELAYED_RECTIFIER_POTASSIUM_CHANNEL_ACTIVITY	0.292	-	-	-	0.1	0.153	0.968	0.968	0.968	0.828	1
1331	NUNODA_RESPONSE_TO_DASATINIB_IMATINIB_UP	0.292	-	-	-	0.1	0.153	0.968	0.968	0.968	0.828	1
1332	CARBOXYLIC_ACID_METABOLIC_PROCESS	0.292	-	-	-	0.3	0.154	0.968	0.968	0.968	0.829	1
1333	KYNG_DNA_DAMAGE_BY_GAMMA_RADIATION	0.292	-	-	-	0.1	0.154	0.968	0.968	0.968	0.829	1
1334	REACTOME_TRIGLYCERIDE_BIOSYNTHESIS	0.292	-	-	-	0.3	0.154	0.968	0.968	0.968	0.829	1
1335	CELLULAR_LIPID_CATABOLIC_PROCESS	0.292	-	-	-	0.2	0.154	0.968	0.968	0.968	0.829	1
1336	GAUTSCHI_SRC_SIGNALING	0.292	-	-	-	0.1	0.154	0.968	0.968	0.968	0.829	1
1337	LEE_BMP2_TARGETS	0.292	-	-	-	0.1	0.154	0.968	0.968	0.968	0.83	1
1338	TONKS_TARGETS_OF_RUNX1_RUNX1T1_FUSION_MONOCYTE	0.292	-	-	-	0.2	0.154	0.968	0.968	0.968	0.83	1
1339	KEGG_MTOR_SIGNALING_PATHWAY	0.292	-	-	-	0.1	0.154	0.968	0.968	0.968	0.83	1
1340	HOWLIN_CITED1_TARGETS_2_DN	0.292	-	-	-	0.2	0.154	0.968	0.968	0.968	0.83	1
1341	METALLOPEPTIDASE_ACTIVITY	0.292	-	-	-	0.4	0.154	0.968	0.968	0.968	0.83	1
1342	KEGG_STEROID_BIOSYNTHESIS	0.292	-	-	-	0.2	0.154	0.968	0.968	0.968	0.83	1
1343	PIONTEK_PKD1_TARGETS_UP	0.292	-	-	-	0.3	0.155	0.968	0.968	0.968	0.83	1
1344	KEGG_REGULATION_OF_AUTOPHAGY	0.292	-	-	-	0.1	0.155	0.968	0.968	0.968	0.83	1
1345	REACTOME_IONOTROPIC_ACTIVITY_OF_KAINATE_RECEPTORS	0.292	-	-	-	<0.1	0.155	0.968	0.968	0.968	0.831	1
1346	POMEROY_MEDULLOBLASTOMA_PROGNOSIS_UP	0.292	-	-	-	0.2	0.155	0.969	0.969	0.969	0.832	1
1347	SYMPORTER_ACTIVITY	0.292	-	-	-	<0.1	0.155	0.969	0.969	0.969	0.832	1
1348	KIM_BIPOLAR_DISORDER_OLIGODENDROCYTE_DENSITY_CORR_DN	0.291	-	-	-	0.2	0.155	0.969	0.969	0.969	0.832	1
1349	REACTOME_SCFSKP2_MEDIATED_DEGRADATION_OF_P27_P21	0.291	-	-	-	0.2	0.155	0.969	0.969	0.969	0.832	1
1350	TTGCCAA,MIR-182	0.291	-	-	-	0.1	0.155	0.969	0.969	0.969	0.832	1
1351	ZHANG_GATA6_TARGETS	0.291	-	-	-	0.1	0.156	0.969	0.969	0.969	0.833	1
1352	GENERATION_OF_PRECURSOR_METABOLITES_AND_ENERGY	0.291	-	-	-	0.1	0.156	0.969	0.969	0.969	0.833	1
1353	V$SMAD4_Q6	0.291	-	-	-	<0.1	0.156	0.969	0.969	0.969	0.833	1
1354	ZHAN_MULTIPLE_MYELOMA_CD1_DN	0.291	-	-	-	0.1	0.156	0.97	0.97	0.97	0.833	1
1355	ESTABLISHMENT_OF_CELLULAR_LOCALIZATION	0.291	-	-	-	0.2	0.156	0.97	0.97	0.97	0.834	1
1356	VESICLE_LOCALIZATION	0.291	-	-	-	<0.1	0.157	0.971	0.971	0.971	0.834	1
1357	WAKABAYASHI_ADIPOGENESIS_PPARG_RXRA_BOUND_WITH_H4K20ME1_MARK	0.291	-	-	-	0.1	0.157	0.971	0.971	0.971	0.834	1
1358	PROTEIN_RNA_COMPLEX_ASSEMBLY	0.29	-	-	-	0.2	0.157	0.973	0.973	0.973	0.835	1
1359	OHGUCHI_LIVER_HNF4A_TARGETS_DN	0.29	-	-	-	0.1	0.158	0.973	0.973	0.973	0.836	1
1360	NEURON_PROJECTION	0.29	-	-	-	<0.1	0.158	0.973	0.973	0.973	0.836	1
1361	IVANOVA_HEMATOPOIESIS_STEM_CELL_AND_PROGENITOR	0.29	-	-	-	0.1	0.158	0.973	0.973	0.973	0.836	1
1362	JUBAN_TARGETS_OF_SPI1_AND_FLI1_UP	0.29	-	-	-	0.1	0.158	0.973	0.973	0.973	0.837	1
1363	SHARMA_ASTROCYTOMA_WITH_NF1_SYNDROM	0.29	-	-	-	<0.1	0.158	0.973	0.973	0.973	0.837	1
1364	REACTOME_ACTIVATED_NOTCH1_TRANSMITS_SIGNAL_TO_THE_NUCLEUS	0.29	-	-	-	<0.1	0.158	0.973	0.973	0.973	0.837	1
1365	DCA_UP.V1_DN	0.29	-	-	-	0.1	0.158	0.973	0.973	0.973	0.838	1
1366	KINETOCHORE	0.29	-	-	-	0.2	0.158	0.973	0.973	0.973	0.838	1
1367	CAIRO_HEPATOBLASTOMA_POOR_SURVIVAL	0.29	-	-	-	<0.1	0.159	0.973	0.973	0.973	0.838	1
1368	V$E2F_03	0.29	-	-	-	0.2	0.159	0.973	0.973	0.973	0.838	1
1369	NUNODA_RESPONSE_TO_DASATINIB_IMATINIB	0.29	-	-	-	<0.1	0.159	0.973	0.973	0.973	0.839	1
1370	DELASERNA_MYOD_TARGETS_UP	0.29	-	-	-	0.1	0.159	0.973	0.973	0.973	0.839	1
1371	MORI_PRE_BI_LYMPHOCYTE	0.29	-	-	-	0.1	0.159	0.973	0.973	0.973	0.839	1
1372	RODRIGUES_THYROID_CARCINOMA	0.29	-	-	-	0.3	0.159	0.973	0.973	0.973	0.839	1
1373	V$NFY_C	0.29	-	-	-	<0.1	0.159	0.973	0.973	0.973	0.839	1
1374	YAGUE_PRETUMOR_DRUG_RESISTANCE	0.29	-	-	-	0.1	0.159	0.973	0.973	0.973	0.839	1
1375	GHANDHI_BYSTANDER_IRRADIATION_DN	0.289	-	-	-	<0.1	0.159	0.973	0.973	0.973	0.84	1
1376	REGULATION_OF_TRANSCRIPTION_FACTOR_ACTIVITY	0.289	-	-	-	0.1	0.16	0.973	0.973	0.973	0.84	1
1377	SPINDLE_MICROTUBULE	0.289	-	-	-	0.2	0.16	0.973	0.973	0.973	0.84	1
1378	PASINI_SUZ12_TARGETS	0.289	-	-	-	0.2	0.16	0.973	0.973	0.973	0.84	1
1379	BECKER_TAMOXIFEN_RESISTANCE_UP	0.289	-	-	-	0.2	0.16	0.973	0.973	0.973	0.84	1
1380	E2F1_UP.V1_UP (20q11)	0.289	-	-	-	0.2	0.16	0.973	0.973	0.973	0.841	1
1381	STARK_HYPPOCAMPUS_22Q11_DELETION_UP	0.289	-	-	-	0.1	0.16	0.973	0.973	0.973	0.841	1
1382	TGACAGNY_V$MEIS1_01	0.289	-	-	-	0.1	0.16	0.973	0.973	0.973	0.841	1
1383	NEGATIVE_REGULATION_OF_DNA_REPLICATION	0.289	-	-	-	<0.1	0.16	0.973	0.973	0.973	0.841	1
1384	WEST_ADRENOCORTICAL_CARCINOMA_VS_ADENOMA_UP	0.289	-	-	-	0.2	0.16	0.973	0.973	0.973	0.842	1
1385	BURTON_ADIPOGENESIS_6	0.289	-	-	-	0.2	0.161	0.973	0.973	0.973	0.842	1
1386	V$IK1_01	0.289	-	-	-	0.1	0.161	0.973	0.973	0.973	0.842	1
1387	REACTOME_TRYPTOPHAN_CATABOLISM	0.289	-	-	-	0.5	0.161	0.973	0.973	0.973	0.843	1
1388	V$CART1_01	0.289	-	-	-	0.1	0.161	0.973	0.973	0.973	0.843	1
1389	V$MYB_Q3	0.289	-	-	-	0.2	0.161	0.973	0.973	0.973	0.843	1
1390	XU_HGF_TARGETS_INDUCED_BY_AKT1_48HR_DN	0.289	-	-	-	0.3	0.161	0.973	0.973	0.973	0.843	1
1391	ORGANIC_ACID_METABOLIC_PROCESS	0.289	-	-	-	0.3	0.161	0.973	0.973	0.973	0.843	1
1392	INAMURA_LUNG_CANCER_SCC_SUBTYPES_DN	0.289	-	-	-	0.3	0.161	0.973	0.973	0.973	0.843	1
1393	PLASARI_TGFB1_TARGETS_1HR_DN	0.288	-	-	-	0.2	0.161	0.973	0.973	0.973	0.843	1
1394	BASSO_HAIRY_CELL_LEUKEMIA_UP	0.288	-	-	-	0.1	0.161	0.973	0.973	0.973	0.844	1
1395	V$NFY_Q6_01	0.288	-	-	-	<0.1	0.162	0.973	0.973	0.973	0.844	1
1396	V$USF_C	0.288	-	-	-	0.5	0.162	0.973	0.973	0.973	0.844	1
1397	REACTOME_SIGNALING_BY_NOTCH3	0.288	-	-	-	0.2	0.162	0.973	0.973	0.973	0.844	1
1398	AAAGGAT,MIR-501	0.288	-	-	-	0.2	0.162	0.973	0.973	0.973	0.844	1
1399	CAGNYGKNAAA_UNKNOWN	0.288	-	-	-	0.2	0.162	0.973	0.973	0.973	0.844	1
1400	MEISSNER_NPC_ICP_WITH_H3_UNMETHYLATED	0.288	-	-	-	0.1	0.162	0.973	0.973	0.973	0.845	1
1401	REACTOME_LYSOSOME_VESICLE_BIOGENESIS	0.288	-	-	-	0.2	0.162	0.973	0.973	0.973	0.845	1
1402	DOUBLE_STRAND_BREAK_REPAIR	0.288	-	-	-	0.2	0.162	0.973	0.973	0.973	0.845	1
1403	PHONG_TNF_TARGETS_DN	0.288	-	-	-	<0.1	0.162	0.973	0.973	0.973	0.846	1
1404	LE_NEURONAL_DIFFERENTIATION_UP	0.288	-	-	-	<0.1	0.163	0.975	0.975	0.975	0.846	1
1405	GTCAGGA,MIR-378	0.288	-	-	-	0.1	0.163	0.975	0.975	0.975	0.847	1
1406	REACTOME_ACTIVATION_OF_NF_KAPPAB_IN_B_CELLS	0.288	-	-	-	0.1	0.163	0.975	0.975	0.975	0.847	1
1407	KEGG_VIBRIO_CHOLERAE_INFECTION	0.287	-	-	-	0.1	0.163	0.975	0.975	0.975	0.847	1
1408	PEREZ_TP53_TARGETS	0.287	-	-	-	<0.1	0.163	0.976	0.976	0.976	0.848	1
1409	GGCAGAC,MIR-346	0.287	-	-	-	0.1	0.164	0.976	0.976	0.976	0.848	1
1410	VOLTAGE_GATED_POTASSIUM_CHANNEL_COMPLEX	0.287	-	-	-	<0.1	0.164	0.976	0.976	0.976	0.848	1
1411	RIZKI_TUMOR_INVASIVENESS_3D	0.287	-	-	-	0.2	0.164	0.976	0.976	0.976	0.849	1
1412	DEURIG_T_CELL_PROLYMPHOCYTIC_LEUKEMIA	0.287	-	-	-	0.1	0.164	0.976	0.976	0.976	0.849	1
1413	E2F3_UP.V1 (6p22)	0.287	-	-	-	0.2	0.164	0.976	0.976	0.976	0.849	1
1414	NUCLEAR_ORGANIZATION_AND_BIOGENESIS	0.287	-	-	-	0.2	0.164	0.976	0.976	0.976	0.849	1
1415	V$E2F1_Q4	0.287	-	-	-	0.2	0.164	0.978	0.978	0.978	0.849	1
1416	KEGG_GLYCOLYSIS_GLUCONEOGENESIS	0.287	-	-	-	0.1	0.165	0.978	0.978	0.978	0.85	1
1417	GYORFFY_MITOXANTRONE_RESISTANCE	0.287	-	-	-	0.2	0.165	0.979	0.979	0.979	0.851	1
1418	TGCACTG,MIR-148A,MIR-152,MIR-148B	0.286	-	-	-	0.2	0.165	0.979	0.979	0.979	0.851	1
1419	WONG_MITOCHONDRIA_GENE_MODULE	0.286	-	-	-	0.1	0.165	0.979	0.979	0.979	0.851	1
1420	MAGRANGEAS_MULTIPLE_MYELOMA_IGG_VS_IGA_DN	0.286	-	-	-	0.2	0.165	0.98	0.98	0.98	0.851	1
1421	V$MYCMAX_01	0.286	-	-	-	0.2	0.166	0.98	0.98	0.98	0.851	1
1422	COFACTOR_BIOSYNTHETIC_PROCESS	0.286	-	-	-	0.3	0.166	0.98	0.98	0.98	0.851	1
1423	TAATAAT,MIR-126	0.286	-	-	-	0.1	0.166	0.98	0.98	0.98	0.852	1
1424	IWANAGA_CARCINOGENESIS_BY_KRAS_UP	0.286	-	-	-	0.1	0.166	0.98	0.98	0.98	0.853	1
1425	WELCH_GATA1_TARGETS	0.286	-	-	-	0.1	0.166	0.98	0.98	0.98	0.853	1
1426	V$IRF1_01	0.286	-	-	-	0.3	0.167	0.98	0.98	0.98	0.853	1
1427	REACTOME_CYCLIN_E_ASSOCIATED_EVENTS_DURING_G1_S_TRANSITION_	0.286	-	-	-	0.2	0.167	0.98	0.98	0.98	0.853	1
1428	YOSHIMURA_MAPK8_TARGETS_UP	0.286	-	-	-	<0.1	0.167	0.98	0.98	0.98	0.853	1
1429	SMITH_TERT_TARGETS	0.286	-	-	-	0.3	0.167	0.98	0.98	0.98	0.853	1
1430	GALACTOSYLTRANSFERASE_ACTIVITY	0.286	-	-	-	<0.1	0.167	0.98	0.98	0.98	0.853	1
1431	ER_NUCLEAR_SIGNALING_PATHWAY	0.285	-	-	-	0.1	0.167	0.98	0.98	0.98	0.853	1
1432	REACTOME_SYNTHESIS_OF_GLYCOSYLPHOSPHATIDYLINOSITOL_GPI	0.285	-	-	-	0.3	0.167	0.98	0.98	0.98	0.853	1
1433	PID_RXR_VDR_PATHWAY	0.285	-	-	-	0.2	0.167	0.98	0.98	0.98	0.853	1
1434	RESPONSE_TO_DRUG	0.285	-	-	-	0.7	0.167	0.98	0.98	0.98	0.854	1
1435	REACTOME_TETRAHYDROBIOPTERIN_BH4_SYNTHESIS_RECYCLING_SALVAGE_AND_REGULATION	0.285	-	-	-	0.3	0.167	0.98	0.98	0.98	0.854	1
1436	V$HNF1_C	0.285	-	-	-	0.1	0.168	0.98	0.98	0.98	0.854	1
1437	MOOTHA_GLYCOLYSIS	0.285	-	-	-	0.3	0.168	0.98	0.98	0.98	0.854	1
1438	MARIADASON_RESPONSE_TO_BUTYRATE_CURCUMIN_SULINDAC_TSA_8	0.285	-	-	-	0.1	0.168	0.98	0.98	0.98	0.855	1
1439	PID_IL1_PATHWAY	0.285	-	-	-	0.3	0.168	0.98	0.98	0.98	0.855	1
1440	ISOPRENOID_METABOLIC_PROCESS	0.285	-	-	-	0.2	0.168	0.98	0.98	0.98	0.855	1
1441	SNACANNNYSYAGA_UNKNOWN	0.285	-	-	-	0.4	0.168	0.98	0.98	0.98	0.855	1
1442	CHOW_RASSF1_TARGETS	0.285	-	-	-	<0.1	0.168	0.98	0.98	0.98	0.855	1
1443	LOPEZ_MBD_TARGETS_IMPRINTED_AND_X_LINKED	0.285	-	-	-	0.1	0.168	0.98	0.98	0.98	0.855	1
1444	PID_LPA4_PATHWAY	0.285	-	-	-	0.3	0.168	0.98	0.98	0.98	0.856	1
1445	TRANSCRIPTION_FACTOR_TFIID_COMPLEX	0.285	-	-	-	0.1	0.168	0.98	0.98	0.98	0.856	1
1446	MITOCHONDRIAL_TRANSPORT	0.285	-	-	-	0.1	0.168	0.98	0.98	0.98	0.856	1
1447	SCHLINGEMANN_SKIN_CARCINOGENESIS_TPA	0.285	-	-	-	0.3	0.169	0.98	0.98	0.98	0.856	1
1448	VOLTAGE_GATED_CATION_CHANNEL_ACTIVITY	0.285	-	-	-	<0.1	0.169	0.98	0.98	0.98	0.856	1
1449	BARIS_THYROID_CANCER_UP	0.285	-	-	-	0.1	0.169	0.98	0.98	0.98	0.856	1
1450	PID_ERB_GENOMIC_PATHWAY	0.284	-	-	-	<0.1	0.169	0.981	0.981	0.981	0.857	1
1451	NRL_DN.V1_DN (14q11.1-q11.2)	0.284	-	-	-	0.2	0.169	0.981	0.981	0.981	0.857	1
1452	REACTOME_ACYL_CHAIN_REMODELLING_OF_PC	0.284	-	-	-	0.2	0.169	0.981	0.981	0.981	0.857	1
1453	CAFFAREL_RESPONSE_TO_THC_8HR_5_DN	0.284	-	-	-	0.4	0.169	0.981	0.981	0.981	0.857	1
1454	GGAMTNNNNNTCCY_UNKNOWN	0.284	-	-	-	0.2	0.169	0.981	0.981	0.981	0.858	1
1455	REACTOME_REGULATION_OF_HYPOXIA_INDUCIBLE_FACTOR_HIF_BY_OXYGEN	0.284	-	-	-	0.3	0.17	0.981	0.981	0.981	0.858	1
1456	ACEVEDO_LIVER_CANCER_WITH_H3K27ME3	0.284	-	-	-	0.2	0.17	0.981	0.981	0.981	0.858	1
1457	FIGUEROA_AML_METHYLATION_CLUSTER_2	0.284	-	-	-	<0.1	0.17	0.981	0.981	0.981	0.858	1
1458	MIKKELSEN_ES_LCP_WITH_H3K4ME3_AND_H3K27ME3	0.284	-	-	-	0.1	0.17	0.981	0.981	0.981	0.859	1
1459	MEISSNER_NPC_ICP_WITH_H3K4ME3	0.284	-	-	-	0.4	0.17	0.981	0.981	0.981	0.859	1
1460	V$PTF1BETA_Q6	0.284	-	-	-	0.2	0.17	0.981	0.981	0.981	0.859	1
1461	NAISHIRO_CTNNB1_TARGETS_WITH_LEF1_MOTIF	0.284	-	-	-	<0.1	0.171	0.981	0.981	0.981	0.859	1
1462	BIOCARTA_MAPK_PATHWAY	0.284	-	-	-	0.3	0.171	0.981	0.981	0.981	0.86	1
1463	KCCGNSWTTT_UNKNOWN	0.283	-	-	-	<0.1	0.171	0.981	0.981	0.981	0.86	1
1464	V$E2F1_Q6_01	0.283	-	-	-	0.3	0.171	0.981	0.981	0.981	0.86	1
1465	REACTOME_UNFOLDED_PROTEIN_RESPONSE	0.283	-	-	-	0.3	0.171	0.981	0.981	0.981	0.86	1
1466	KYNG_NORMAL_AGING_DN	0.283	-	-	-	0.2	0.171	0.981	0.981	0.981	0.86	1
1467	V$SP1_Q6_01	0.283	-	-	-	<0.1	0.171	0.981	0.981	0.981	0.861	1
1468	GGGATGC,MIR-324-5P	0.283	-	-	-	0.1	0.171	0.981	0.981	0.981	0.861	1
1469	AGTGCGT,MIR-521	0.283	-	-	-	0.2	0.171	0.981	0.981	0.981	0.861	1
1470	BRUNEAU_SEPTATION_VENTRICULAR	0.283	-	-	-	0.1	0.171	0.981	0.981	0.981	0.862	1
1471	REACTOME_AUTODEGRADATION_OF_CDH1_BY_CDH1_APC_C	0.283	-	-	-	0.2	0.172	0.981	0.981	0.981	0.862	1
1472	SCHLESINGER_METHYLATED_IN_COLON_CANCER	0.283	-	-	-	0.3	0.172	0.981	0.981	0.981	0.862	1
1473	ZHOU_PANCREATIC_ENDOCRINE_PROGENITOR	0.283	-	-	-	0.1	0.172	0.981	0.981	0.981	0.862	1
1474	SOTIRIOU_BREAST_CANCER_GRADE_1_VS_3	0.283	-	-	-	0.2	0.172	0.981	0.981	0.981	0.862	1
1475	AMINO_ACID_AND_DERIVATIVE_METABOLIC_PROCESS	0.283	-	-	-	0.3	0.172	0.981	0.981	0.981	0.862	1
1476	WAMUNYOKOLI_OVARIAN_CANCER_LMP	0.283	-	-	-	0.3	0.172	0.981	0.981	0.981	0.862	1
1477	MARIADASON_RESPONSE_TO_BUTYRATE_SULINDAC_6	0.283	-	-	-	<0.1	0.172	0.981	0.981	0.981	0.862	1
1478	SHEPARD_BMYB_TARGETS	0.282	-	-	-	0.1	0.173	0.984	0.984	0.984	0.864	1
1479	REACTOME_REGULATION_OF_BETA_CELL_DEVELOPMENT	0.282	-	-	-	0.1	0.173	0.984	0.984	0.984	0.864	1
1480	RNA_POLYMERASE_II_TRANSCRIPTION_MEDIATOR_ACTIVITY	0.282	-	-	-	<0.1	0.173	0.984	0.984	0.984	0.864	1
1481	BUSA_SAM68_TARGETS_UP	0.282	-	-	-	0.2	0.173	0.984	0.984	0.984	0.864	1
1482	YAO_HOXA10_TARGETS_VIA_PROGESTERONE_DN	0.282	-	-	-	0.4	0.173	0.984	0.984	0.984	0.864	1
1483	RNA_HELICASE_ACTIVITY	0.282	-	-	-	0.2	0.174	0.986	0.986	0.986	0.865	1
1484	V$CACBINDINGPROTEIN_Q6	0.282	-	-	-	<0.1	0.174	0.986	0.986	0.986	0.866	1
1485	YAO_TEMPORAL_RESPONSE_TO_PROGESTERONE_CLUSTER_1	0.282	-	-	-	0.3	0.174	0.986	0.986	0.986	0.866	1
1486	OLSSON_E2F3_TARGETS	0.282	-	-	-	0.1	0.174	0.986	0.986	0.986	0.866	1
1487	KEGG_PRIMARY_BILE_ACID_BIOSYNTHESIS	0.282	-	-	-	0.3	0.174	0.986	0.986	0.986	0.866	1
1488	INOSITOL_OR_PHOSPHATIDYLINOSITOL_KINASE_ACTIVITY	0.282	-	-	-	0.4	0.174	0.986	0.986	0.986	0.867	1
1489	BROWNE_HCMV_INFECTION_10HR_UP	0.282	-	-	-	0.1	0.175	0.986	0.986	0.986	0.867	1
1490	REACTOME_GLUCAGON_SIGNALING_IN_METABOLIC_REGULATION	0.282	-	-	-	0.3	0.175	0.986	0.986	0.986	0.867	1
1491	TONKS_TARGETS_OF_RUNX1_RUNX1T1_FUSION_SUSTAINED_IN_GRANULOCYTE	0.282	-	-	-	0.2	0.175	0.986	0.986	0.986	0.867	1
1492	STEGER_ADIPOGENESIS_UP	0.282	-	-	-	0.4	0.175	0.986	0.986	0.986	0.868	1
1493	SODIUM_CHANNEL_ACTIVITY	0.281	-	-	-	0.2	0.175	0.986	0.986	0.986	0.868	1
1494	BCAT_BILD_ET_AL	0.281	-	-	-	0.1	0.175	0.987	0.987	0.987	0.868	1
1495	MONOCARBOXYLIC_ACID_METABOLIC_PROCESS	0.281	-	-	-	0.1	0.176	0.988	0.988	0.988	0.869	1
1496	CORRADETTI_MTOR_PATHWAY_REGULATORS_DN	0.281	-	-	-	0.2	0.176	0.988	0.988	0.988	0.869	1
1497	DARWICHE_PAPILLOMA_PROGRESSION_RISK	0.281	-	-	-	0.1	0.176	0.989	0.989	0.989	0.869	1
1498	REGULATION_OF_MYELOID_CELL_DIFFERENTIATION	0.281	-	-	-	0.2	0.176	0.989	0.989	0.989	0.869	1
1499	SETLUR_PROSTATE_CANCER_TMPRSS2_ERG_FUSION_UP	0.281	-	-	-	0.1	0.176	0.99	0.99	0.99	0.87	1
1500	BAELDE_DIABETIC_NEPHROPATHY	0.281	-	-	-	0.3	0.177	0.991	0.991	0.991	0.871	1
1501	WANG_RESPONSE_TO_FORSKOLIN_UP	0.281	-	-	-	0.3	0.177	0.992	0.992	0.992	0.871	1
1502	GOLGI_MEMBRANE	0.281	-	-	-	0.1	0.177	0.992	0.992	0.992	0.871	1
1503	V$CEBPB_02	0.28	-	-	-	0.2	0.177	0.992	0.992	0.992	0.872	1
1504	ATAGGAA,MIR-202	0.28	-	-	-	0.1	0.177	0.992	0.992	0.992	0.872	1
1505	MICROTUBULE_BASED_PROCESS	0.28	-	-	-	0.1	0.177	0.992	0.992	0.992	0.872	1
1506	ION_TRANSMEMBRANE_TRANSPORTER_ACTIVITY	0.28	-	-	-	<0.1	0.178	0.993	0.993	0.993	0.872	1
1507	RESPONSE_TO_NUTRIENT_LEVELS	0.28	-	-	-	0.2	0.178	0.994	0.994	0.994	0.873	1
1508	SEITZ_NEOPLASTIC_TRANSFORMATION_BY_8P_DELETION	0.28	-	-	-	0.3	0.178	0.995	0.995	0.995	0.873	1
1509	NEGATIVE_REGULATION_OF_CELLULAR_BIOSYNTHETIC_PROCESS	0.28	-	-	-	0.4	0.178	0.995	0.995	0.995	0.873	1
1510	MATZUK_OVULATION	0.28	-	-	-	0.2	0.179	0.995	0.995	0.995	0.874	1
1511	REACTOME_APC_C_CDC20_MEDIATED_DEGRADATION_OF_MITOTIC_PROTEINS	0.28	-	-	-	0.2	0.179	0.995	0.995	0.995	0.874	1
1512	THILLAINADESAN_ZNF217_TARGETS_DN	0.279	-	-	-	0.2	0.18	0.999	0.999	0.999	0.875	1
1513	FOCAL_ADHESION_FORMATION	0.279	-	-	-	0.2	0.18	0.999	0.999	0.999	0.875	1
1514	REACTOME_ELEVATION_OF_CYTOSOLIC_CA2_LEVELS	0.279	-	-	-	0.2	0.18	0.999	0.999	0.999	0.875	1
1515	BYSTRYKH_HEMATOPOIESIS_STEM_CELL_RUNX1	0.279	-	-	-	<0.1	0.18	1	1	1	0.875	1
1516	KRAS.600.LUNG.BREAST_UP.V1_DN (12p12.1)	0.279	-	-	-	0.1	0.18	1	1	1	0.875	1
1517	NEUROPEPTIDE_SIGNALING_PATHWAY	0.279	-	-	-	0.1	0.18	1	1	1	0.876	1
1518	TUBE_MORPHOGENESIS	0.279	-	-	-	<0.1	0.18	1	1	1	0.876	1
1519	PRC2_SUZ12_UP.V1_UP	0.279	-	-	-	<0.1	0.181	1	1	1	0.876	1
1520	RODRIGUES_NTN1_TARGETS	0.279	-	-	-	0.1	0.181	1	1	1	0.876	1
1521	KEGG_PENTOSE_AND_GLUCURONATE_INTERCONVERSIONS	0.279	-	-	-	<0.1	0.181	1	1	1	0.876	1
1522	V$MYB_Q6	0.279	-	-	-	0.1	0.181	1	1	1	0.877	1
1523	KIM_GERMINAL_CENTER_T_HELPER_UP	0.279	-	-	-	0.5	0.181	1	1	1	0.877	1
1524	CCATCCA,MIR-432	0.279	-	-	-	0.1	0.181	1	1	1	0.877	1
1525	CCTGCTG,MIR-214	0.279	-	-	-	0.1	0.181	1	1	1	0.877	1
1526	GAZDA_DIAMOND_BLACKFAN_ANEMIA_MYELOID_DN	0.278	-	-	-	0.3	0.182	1	1	1	0.878	1
1527	V$MYOGENIN_Q6	0.278	-	-	-	<0.1	0.182	1	1	1	0.878	1
1528	HOOI_ST7_TARGETS_DN	0.278	-	-	-	0.4	0.182	1	1	1	0.878	1
1529	REACTOME_TRANSCRIPTION_COUPLED_NER_TC_NER	0.278	-	-	-	0.2	0.182	1	1	1	0.878	1
1530	MOOTHA_MITOCHONDRIA	0.278	-	-	-	0.1	0.182	1	1	1	0.878	1
1531	ABBUD_LIF_SIGNALING_2_UP	0.278	-	-	-	0.3	0.182	1	1	1	0.879	1
1532	V$CDPCR3_01	0.278	-	-	-	0.1	0.183	1	1	1	0.88	1
1533	MULLIGHAN_NPM1_MUTATED_SIGNATURE_1	0.278	-	-	-	0.1	0.183	1	1	1	0.88	1
1534	PROTEIN_PHOSPHATASE_BINDING	0.278	-	-	-	0.2	0.183	1	1	1	0.88	1
1535	SGCGSSAAA_V$E2F1DP2_01	0.278	-	-	-	0.3	0.183	1	1	1	0.88	1
1536	CYTAGCAAY_UNKNOWN	0.278	-	-	-	0.2	0.183	1	1	1	0.881	1
1537	DANG_BOUND_BY_MYC	0.278	-	-	-	0.2	0.183	1	1	1	0.881	1
1538	SMAD_BINDING	0.278	-	-	-	0.2	0.183	1	1	1	0.881	1
1539	LEE_LIVER_CANCER_CIPROFIBRATE_DN	0.278	-	-	-	0.3	0.183	1	1	1	0.881	1
1540	NUCLEAR_REPLICATION_FORK	0.278	-	-	-	0.1	0.184	1	1	1	0.881	1
1541	PROTEIN_AMINO_ACID_AUTOPHOSPHORYLATION	0.278	-	-	-	<0.1	0.184	1	1	1	0.882	1
1542	REACTOME_REGULATION_OF_AMPK_ACTIVITY_VIA_LKB1	0.277	-	-	-	0.2	0.184	1	1	1	0.882	1
1543	DORN_ADENOVIRUS_INFECTION_32HR	0.277	-	-	-	0.2	0.184	1	1	1	0.882	1
1544	PIGF_UP.V1 (2p21-p16)	0.277	-	-	-	0.4	0.184	1	1	1	0.882	1
1545	TURASHVILI_BREAST_LOBULAR_CARCINOMA_VS_LOBULAR_NORMAL	0.277	-	-	-	<0.1	0.184	1	1	1	0.882	1
1546	PEROXISOMAL_PART (2)	0.277	-	-	-	0.1	0.184	1	1	1	0.882	1
1547	V$OSF2_Q6	0.277	-	-	-	0.2	0.184	1	1	1	0.882	1
1548	LINDVALL_IMMORTALIZED_BY_TERT	0.277	-	-	-	0.2	0.184	1	1	1	0.882	1
1549	VETTER_TARGETS_OF_PRKCA_AND_ETS1	0.277	-	-	-	<0.1	0.185	1	1	1	0.882	1
1550	REACTOME_MITOCHONDRIAL_FATTY_ACID_BETA_OXIDATION	0.277	-	-	-	0.1	0.185	1	1	1	0.882	1
1551	BROWNE_HCMV_INFECTION_18HR	0.277	-	-	-	0.3	0.185	1	1	1	0.882	1
1552	SPHINGOLIPID_METABOLIC_PROCESS	0.277	-	-	-	0.2	0.185	1	1	1	0.883	1
1553	WANG_IMMORTALIZED_BY_HOXA9_AND_MEIS1	0.277	-	-	-	0.3	0.185	1	1	1	0.883	1
1554	V$SMAD_Q6	0.277	-	-	-	<0.1	0.185	1	1	1	0.883	1
1555	ORGANELLE_OUTER_MEMBRANE	0.277	-	-	-	0.1	0.185	1	1	1	0.884	1
1556	SUBSTRATE_SPECIFIC_CHANNEL_ACTIVITY	0.277	-	-	-	<0.1	0.186	1	1	1	0.884	1
1557	GTTATAT,MIR-410	0.277	-	-	-	0.2	0.186	1	1	1	0.884	1
1558	V$HNF1_01	0.277	-	-	-	0.2	0.186	1	1	1	0.884	1
1559	DIERICK_SEROTONIN_FUNCTION_GENES	0.277	-	-	-	0.4	0.186	1	1	1	0.884	1
1560	BILE_ACID_METABOLIC_PROCESS	0.277	-	-	-	0.3	0.186	1	1	1	0.884	1
1561	SARTIPY_NORMAL_AT_INSULIN_RESISTANCE_DN	0.277	-	-	-	0.3	0.186	1	1	1	0.885	1
1562	RECEPTOR_SIGNALING_PROTEIN_SERINE_THREONINE_KINASE_ACTIVITY	0.276	-	-	-	0.1	0.187	1	1	1	0.885	1
1563	APICAL_JUNCTION_COMPLEX (2)	0.276	-	-	-	0.1	0.187	1	1	1	0.885	1
1564	LEE_LIVER_CANCER_E2F1_DN	0.276	-	-	-	0.6	0.187	1	1	1	0.885	1
1565	HOFMANN_CELL_LYMPHOMA_UP	0.276	-	-	-	0.3	0.188	1	1	1	0.886	1
1566	BOYAULT_LIVER_CANCER_SUBCLASS_G1_UP	0.276	-	-	-	0.1	0.188	1	1	1	0.886	1
1567	V$AREB6_01	0.276	-	-	-	0.1	0.188	1	1	1	0.886	1
1568	V$OCT_Q6	0.276	-	-	-	<0.1	0.188	1	1	1	0.887	1
1569	MIYAGAWA_TARGETS_OF_EWSR1_ETS_FUSIONS	0.276	-	-	-	0.1	0.188	1	1	1	0.887	1
1570	DNA_REPLICATION	0.276	-	-	-	0.1	0.188	1	1	1	0.887	1
1571	GTGCAAA,MIR-507	0.276	-	-	-	0.2	0.188	1	1	1	0.887	1
1572	DACOSTA_ERCC3_ALLELE_XPCS_VS_TTD	0.276	-	-	-	0.1	0.188	1	1	1	0.887	1
1573	PEART_HDAC_PROLIFERATION_CLUSTER_UP	0.276	-	-	-	0.1	0.189	1	1	1	0.887	1
1574	REACTOME_UNWINDING_OF_DNA	0.276	-	-	-	0.3	0.189	1	1	1	0.887	1
1575	V$HNF4_Q6	0.276	-	-	-	0.2	0.189	1	1	1	0.887	1
1576	PROTEIN_MATURATION	0.275	-	-	-	0.4	0.189	1	1	1	0.887	1
1577	TSAI_DNAJB4_TARGETS	0.275	-	-	-	0.1	0.189	1	1	1	0.887	1
1578	ROVERSI_GLIOMA_COPY_NUMBER_UP	0.275	-	-	-	0.2	0.189	1	1	1	0.887	1
1579	VALK_AML_WITH_FLT3_ITD	0.275	-	-	-	0.5	0.189	1	1	1	0.887	1
1580	ATCATGA,MIR-433	0.275	-	-	-	0.1	0.189	1	1	1	0.887	1
1581	YAGUE_PRETUMOR_DRUG_RESISTANCE_UP	0.275	-	-	-	<0.1	0.189	1	1	1	0.887	1
1582	XU_GH1_AUTOCRINE_TARGETS_DN	0.275	-	-	-	0.3	0.189	1	1	1	0.887	1
1583	DONATO_CELL_CYCLE_TRETINOIN	0.275	-	-	-	0.2	0.189	1	1	1	0.887	1
1584	REACTOME_IL1_SIGNALING	0.275	-	-	-	0.3	0.189	1	1	1	0.887	1
1585	V$NF1_Q6	0.275	-	-	-	<0.1	0.189	1	1	1	0.887	1
1586	V$EFC_Q6	0.275	-	-	-	0.2	0.189	1	1	1	0.888	1
1587	KAUFFMANN_DNA_REPLICATION_GENES	0.275	-	-	-	0.1	0.19	1	1	1	0.888	1
1588	KORKOLA_SEMINOMA_UP	0.275	-	-	-	0.3	0.19	1	1	1	0.888	1
1589	BIOGENIC_AMINE_METABOLIC_PROCESS	0.275	-	-	-	0.5	0.19	1	1	1	0.888	1
1590	GAUSSMANN_MLL_AF4_FUSION_TARGETS_G	0.275	-	-	-	0.1	0.19	1	1	1	0.888	1
1591	ROY_WOUND_BLOOD_VESSEL_DN	0.275	-	-	-	0.2	0.19	1	1	1	0.889	1
1592	WIKMAN_ASBESTOS_LUNG_CANCER_UP	0.275	-	-	-	0.1	0.19	1	1	1	0.889	1
1593	HATADA_METHYLATED_IN_LUNG_CANCER	0.275	-	-	-	0.3	0.19	1	1	1	0.889	1
1594	REACTOME_BILE_ACID_AND_BILE_SALT_METABOLISM	0.275	-	-	-	0.2	0.19	1	1	1	0.889	1
1595	PHOSPHOTRANSFERASE_ACTIVITY_PHOSPHATE_GROUP_AS_ACCEPTOR	0.275	-	-	-	0.1	0.19	1	1	1	0.889	1
1596	OUILLETTE_CLL_13Q14_DELETION_UP	0.275	-	-	-	0.4	0.19	1	1	1	0.889	1
1597	ION_CHANNEL_ACTIVITY	0.275	-	-	-	<0.1	0.19	1	1	1	0.889	1
1598	WONG_ENDMETRIUM_CANCER	0.275	-	-	-	0.1	0.19	1	1	1	0.889	1
1599	ATGCTGG,MIR-338	0.275	-	-	-	<0.1	0.19	1	1	1	0.889	1
1600	INTRACELLULAR_RECEPTOR_MEDIATED_SIGNALING_PATHWAY	0.275	-	-	-	0.1	0.19	1	1	1	0.889	1
1601	REACTOME_IRAK1_RECRUITS_IKK_COMPLEX	0.275	-	-	-	<0.1	0.19	1	1	1	0.889	1
1602	GRADE_COLON_AND_RECTAL_CANCER_DN	0.274	-	-	-	0.2	0.191	1	1	1	0.89	1
1603	CHROMOSOMEPERICENTRIC_REGION	0.274	-	-	-	0.1	0.191	1	1	1	0.89	1
1604	SPLICEOSOME_ASSEMBLY	0.274	-	-	-	<0.1	0.191	1	1	1	0.89	1
1605	ZEMBUTSU_SENSITIVITY_TO_CISPLATIN	0.274	-	-	-	0.1	0.191	1	1	1	0.89	1
1606	ERB2_UP.V1_UP	0.274	-	-	-	0.3	0.191	1	1	1	0.89	1
1607	KEGG_ETHER_LIPID_METABOLISM	0.274	-	-	-	0.2	0.191	1	1	1	0.89	1
1608	KEGG_TRYPTOPHAN_METABOLISM	0.274	-	-	-	0.2	0.192	1	1	1	0.89	1
1609	SODIUM_ION_TRANSPORT	0.274	-	-	-	0.2	0.192	1	1	1	0.891	1
1610	HOSHIDA_LIVER_CANCER_SUBCLASS_S2	0.274	-	-	-	0.1	0.192	1	1	1	0.891	1
1611	REACTOME_ORGANIC_CATION_ANION_ZWITTERION_TRANSPORT	0.274	-	-	-	0.3	0.192	1	1	1	0.891	1
1612	RNA_ELONGATION	0.274	-	-	-	0.3	0.192	1	1	1	0.891	1
1613	BIOCARTA_RAS_PATHWAY	0.274	-	-	-	0.1	0.192	1	1	1	0.891	1
1614	PHAGOCYTOSIS	0.274	-	-	-	0.1	0.192	1	1	1	0.891	1
1615	REACTOME_SYNTHESIS_OF_PIPS_AT_THE_GOLGI_MEMBRANE	0.274	-	-	-	0.4	0.193	1	1	1	0.892	1
1616	FORTSCHEGGER_PHF8_TARGETS	0.273	-	-	-	0.2	0.193	1	1	1	0.892	1
1617	PASTURAL_RIZ1_TARGETS	0.273	-	-	-	0.4	0.193	1	1	1	0.892	1
1618	CUI_GLUCOSE_DEPRIVATION	0.273	-	-	-	0.4	0.193	1	1	1	0.892	1
1619	ESTABLISHMENT_OF_ORGANELLE_LOCALIZATION	0.273	-	-	-	0.1	0.193	1	1	1	0.892	1
1620	CAFFAREL_RESPONSE_TO_THC_8HR_3_DN	0.273	-	-	-	<0.1	0.193	1	1	1	0.892	1
1621	RUAN_RESPONSE_TO_TROGLITAZONE_DN	0.273	-	-	-	0.3	0.194	1	1	1	0.893	1
1622	PIGMENT_BIOSYNTHETIC_PROCESS	0.273	-	-	-	0.4	0.194	1	1	1	0.893	1
1623	RNA_POLYMERASE_II_TRANSCRIPTION_FACTOR_ACTIVITYENHANCER_BINDING	0.273	-	-	-	0.2	0.194	1	1	1	0.893	1
1624	METAL_ION_TRANSMEMBRANE_TRANSPORTER_ACTIVITY	0.273	-	-	-	<0.1	0.194	1	1	1	0.893	1
1625	FLECHNER_BIOPSY_KIDNEY_TRANSPLANT_REJECTED_VS_OK_DN	0.273	-	-	-	0.2	0.194	1	1	1	0.893	1
1626	V$TFIII_Q6	0.273	-	-	-	0.1	0.194	1	1	1	0.893	1
1627	LIPID_METABOLIC_PROCESS	0.273	-	-	-	0.1	0.194	1	1	1	0.894	1
1628	LIPID_CATABOLIC_PROCESS	0.273	-	-	-	0.3	0.194	1	1	1	0.894	1
1629	ROVERSI_GLIOMA_COPY_NUMBER	0.273	-	-	-	0.2	0.194	1	1	1	0.894	1
1630	XU_AKT1_TARGETS_48HR	0.273	-	-	-	0.2	0.194	1	1	1	0.894	1
1631	ONDER_CDH1_TARGETS_1	0.273	-	-	-	0.2	0.195	1	1	1	0.894	1
1632	TUOMISTO_TUMOR_SUPPRESSION_BY_COL13A1_DN	0.273	-	-	-	<0.1	0.195	1	1	1	0.894	1
1633	ESTABLISHMENT_AND_OR_MAINTENANCE_OF_CHROMATIN_ARCHITECTURE	0.273	-	-	-	<0.1	0.195	1	1	1	0.894	1
1634	BIOCARTA_PROTEASOME_PATHWAY	0.273	-	-	-	0.4	0.195	1	1	1	0.895	1
1635	MYLLYKANGAS_AMPLIFICATION_HOT_SPOT_16	0.273	-	-	-	0.1	0.195	1	1	1	0.895	1
1636	REACTOME_CYTOCHROME_P450_ARRANGED_BY_SUBSTRATE_TYPE	0.273	-	-	-	0.1	0.195	1	1	1	0.895	1
1637	REACTOME_VIF_MEDIATED_DEGRADATION_OF_APOBEC3G	0.272	-	-	-	0.4	0.195	1	1	1	0.895	1
1638	LI_WILMS_TUMOR_VS_FETAL_KIDNEY_1_DN	0.272	-	-	-	0.2	0.196	1	1	1	0.896	1
1639	PUJANA_BREAST_CANCER_WITH_BRCA1_MUTATED_DN	0.272	-	-	-	0.2	0.196	1	1	1	0.896	1
1640	CYTOSKELETON_DEPENDENT_INTRACELLULAR_TRANSPORT	0.272	-	-	-	0.1	0.196	1	1	1	0.896	1
1641	BIOCARTA_CREB_PATHWAY	0.272	-	-	-	0.2	0.196	1	1	1	0.896	1
1642	CELLULAR_MACROMOLECULE_CATABOLIC_PROCESS	0.272	-	-	-	0.3	0.196	1	1	1	0.896	1
1643	PKCA_DN.V1_UP	0.272	-	-	-	0.1	0.196	1	1	1	0.896	1
1644	MALONEY_RESPONSE_TO_17AAG_DN	0.272	-	-	-	0.3	0.196	1	1	1	0.896	1
1645	WENG_POR_TARGETS_GLOBAL_UP	0.272	-	-	-	0.1	0.197	1	1	1	0.897	1
1646	MITOCHONDRIAL_INNER_MEMBRANE	0.272	-	-	-	0.3	0.197	1	1	1	0.897	1
1647	AGUIRRE_PANCREATIC_CANCER_COPY_NUMBER	0.272	-	-	-	0.1	0.197	1	1	1	0.897	1
1648	MULLIGHAN_NPM1_SIGNATURE_3	0.272	-	-	-	0.1	0.197	1	1	1	0.897	1
1649	MAINTENANCE_OF_CELLULAR_LOCALIZATION	0.272	-	-	-	<0.1	0.197	1	1	1	0.897	1
1650	KEGG_VALINE_LEUCINE_AND_ISOLEUCINE_DEGRADATION	0.271	-	-	-	0.2	0.198	1	1	1	0.897	1
1651	NUCLEOBASENUCLEOSIDENUCLEOTIDE_AND_NUCLEIC_ACID_TRANSMEMBRANE_TRANSPORTER_ACTIVITY	0.271	-	-	-	0.4	0.198	1	1	1	0.897	1
1652	AMINE_CATABOLIC_PROCESS	0.271	-	-	-	0.2	0.198	1	1	1	0.897	1
1653	ST_P38_MAPK_PATHWAY	0.271	-	-	-	0.2	0.198	1	1	1	0.898	1
1654	LANDIS_BREAST_CANCER_PROGRESSION	0.271	-	-	-	0.1	0.198	1	1	1	0.898	1
1655	V$PAX8_01	0.271	-	-	-	0.2	0.198	1	1	1	0.898	1
1656	HOLLEMAN_VINCRISTINE_RESISTANCE_ALL_UP	0.271	-	-	-	<0.1	0.198	1	1	1	0.899	1
1657	PIGF_UP.V1_UP (2p21-p16)	0.271	-	-	-	0.5	0.199	1	1	1	0.899	1
1658	LOPES_METHYLATED_IN_COLON_CANCER	0.271	-	-	-	0.2	0.199	1	1	1	0.899	1
1659	JAIN_NFKB_SIGNALING	0.271	-	-	-	0.2	0.199	1	1	1	0.899	1
1660	RAS_GUANYL_NUCLEOTIDE_EXCHANGE_FACTOR_ACTIVITY	0.271	-	-	-	0.4	0.199	1	1	1	0.899	1
1661	ABRAMSON_INTERACT_WITH_AIRE	0.271	-	-	-	0.1	0.199	1	1	1	0.899	1
1662	MIKKELSEN_NPC_HCP_WITH_H3K4ME3_AND_H3K27ME3	0.271	-	-	-	<0.1	0.199	1	1	1	0.9	1
1663	CGCTGCT,MIR-503	0.271	-	-	-	0.2	0.2	1	1	1	0.9	1
1664	MISSIAGLIA_REGULATED_BY_METHYLATION_DN	0.271	-	-	-	0.1	0.2	1	1	1	0.9	1
1665	TRANSCRIPTION	0.271	-	-	-	0.1	0.2	1	1	1	0.9	1
1666	ST_TYPE_I_INTERFERON_PATHWAY	0.271	-	-	-	0.6	0.2	1	1	1	0.9	1
1667	PID_P53_REGULATION_PATHWAY	0.271	-	-	-	0.1	0.2	1	1	1	0.9	1
1668	FRASOR_RESPONSE_TO_SERM_OR_FULVESTRANT	0.271	-	-	-	0.1	0.2	1	1	1	0.9	1
1669	ALK_DN.V1_DN (2p23)	0.27	-	-	-	0.1	0.2	1	1	1	0.901	1
1670	RAMJAUN_APOPTOSIS_BY_TGFB1_VIA_MAPK1	0.27	-	-	-	0.1	0.2	1	1	1	0.901	1
1671	ENDONUCLEASE_ACTIVITY_GO_0016893	0.27	-	-	-	0.1	0.201	1	1	1	0.902	1
1672	REACTOME_BRANCHED_CHAIN_AMINO_ACID_CATABOLISM	0.27	-	-	-	0.2	0.201	1	1	1	0.902	1
1673	ENDOTHELIAL_CELL_PROLIFERATION	0.27	-	-	-	0.4	0.201	1	1	1	0.902	1
1674	SCIBETTA_KDM5B_TARGETS	0.27	-	-	-	0.4	0.201	1	1	1	0.902	1
1675	HORMONE_RECEPTOR_BINDING	0.27	-	-	-	0.3	0.201	1	1	1	0.902	1
1676	ZHAN_VARIABLE_EARLY_DIFFERENTIATION_GENES_UP	0.27	-	-	-	0.2	0.201	1	1	1	0.902	1
1677	BASSO_HAIRY_CELL_LEUKEMIA	0.27	-	-	-	0.2	0.201	1	1	1	0.902	1
1678	REGULATION_OF_JNK_ACTIVITY	0.27	-	-	-	0.2	0.201	1	1	1	0.903	1
1679	LEF1_UP.V1_DN (4q23-q25)	0.27	-	-	-	0.3	0.201	1	1	1	0.903	1
1680	VALK_AML_WITH_11Q23_REARRANGED	0.27	-	-	-	0.2	0.201	1	1	1	0.903	1
1681	VACUOLAR_MEMBRANE	0.27	-	-	-	0.2	0.201	1	1	1	0.903	1
1682	V$HNF4_DR1_Q3	0.27	-	-	-	0.1	0.201	1	1	1	0.903	1
1683	REACTOME_APC_C_CDH1_MEDIATED_DEGRADATION_OF_CDC20_AND_OTHER_APC_C_CDH1_TARGETED_PROTEINS_IN_LATE_MITOSIS_EARLY_G1	0.27	-	-	-	0.2	0.201	1	1	1	0.903	1
1684	TCTGATA,MIR-361	0.27	-	-	-	0.1	0.202	1	1	1	0.904	1
1685	SCHLOSSER_SERUM_RESPONSE_UP	0.27	-	-	-	0.3	0.203	1	1	1	0.904	1
1686	MOOTHA_HUMAN_MITODB_6_2002	0.269	-	-	-	0.2	0.203	1	1	1	0.904	1
1687	CHANDRAN_METASTASIS_TOP50_UP	0.269	-	-	-	0.1	0.203	1	1	1	0.904	1
1688	GATED_CHANNEL_ACTIVITY	0.269	-	-	-	<0.1	0.203	1	1	1	0.904	1
1689	WHITFIELD_CELL_CYCLE_LITERATURE	0.269	-	-	-	0.1	0.203	1	1	1	0.904	1
1690	REACTOME_DESTABILIZATION_OF_MRNA_BY_AUF1_HNRNP_D0	0.269	-	-	-	0.3	0.203	1	1	1	0.904	1
1691	PID_ECADHERIN_NASCENT_AJ_PATHWAY	0.269	-	-	-	<0.1	0.203	1	1	1	0.904	1
1692	LANDIS_ERBB2_BREAST_TUMORS_324_UP	0.269	-	-	-	0.3	0.203	1	1	1	0.904	1
1693	MEISSNER_ES_ICP_WITH_H3K4ME3	0.269	-	-	-	0.2	0.203	1	1	1	0.904	1
1694	CELL_PROJECTION_BIOGENESIS	0.269	-	-	-	0.2	0.203	1	1	1	0.904	1
1695	MICROVILLUS	0.269	-	-	-	0.1	0.203	1	1	1	0.904	1
1696	OXIDOREDUCTASE_ACTIVITY_ACTING_ON_NADH_OR_NADPH	0.269	-	-	-	0.2	0.203	1	1	1	0.905	1
1697	REACTOME_DNA_REPLICATION	0.269	-	-	-	0.2	0.204	1	1	1	0.905	1
1698	NEGATIVE_REGULATION_OF_DNA_METABOLIC_PROCESS	0.269	-	-	-	0.2	0.204	1	1	1	0.905	1
1699	KIM_ALL_DISORDERS_OLIGODENDROCYTE_NUMBER_CORR	0.269	-	-	-	0.5	0.204	1	1	1	0.905	1
1700	WAMUNYOKOLI_OVARIAN_CANCER_GRADES_1_2_UP	0.269	-	-	-	0.1	0.204	1	1	1	0.905	1
1701	BURTON_ADIPOGENESIS_5	0.269	-	-	-	0.3	0.204	1	1	1	0.905	1
1702	TCCATTKW_UNKNOWN	0.269	-	-	-	<0.1	0.204	1	1	1	0.905	1
1703	REGULATION_OF_ACTION_POTENTIAL	0.269	-	-	-	0.3	0.204	1	1	1	0.906	1
1704	ST_INTERFERON_GAMMA_PATHWAY	0.269	-	-	-	0.4	0.204	1	1	1	0.906	1
1705	BIOCARTA_VEGF_PATHWAY	0.269	-	-	-	0.2	0.204	1	1	1	0.906	1
1706	WENG_POR_TARGETS_GLOBAL	0.269	-	-	-	0.1	0.205	1	1	1	0.906	1
1707	V$PAX3_B	0.269	-	-	-	0.1	0.205	1	1	1	0.906	1
1708	LOW_DENSITY_LIPOPROTEIN_BINDING	0.269	-	-	-	0.1	0.205	1	1	1	0.906	1
1709	NUCLEAR_HORMONE_RECEPTOR_BINDING	0.268	-	-	-	0.3	0.205	1	1	1	0.907	1
1710	GCTNWTTGK_UNKNOWN	0.268	-	-	-	0.2	0.205	1	1	1	0.907	1
1711	RNTCANNRNNYNATTW_UNKNOWN	0.268	-	-	-	<0.1	0.206	1	1	1	0.907	1
1712	REACTOME_MITOTIC_M_M_G1_PHASES	0.268	-	-	-	0.1	0.206	1	1	1	0.907	1
1713	KEGG_SULFUR_METABOLISM	0.268	-	-	-	0.2	0.207	1	1	1	0.908	1
1714	RANKIN_ANGIOGENIC_TARGETS_OF_VHL_HIF2A_UP	0.268	-	-	-	0.2	0.207	1	1	1	0.908	1
1715	V$POU3F2_02	0.268	-	-	-	0.1	0.207	1	1	1	0.908	1
1716	HOFMANN_MYELODYSPLASTIC_SYNDROM_LOW_RISK_DN	0.268	-	-	-	0.2	0.207	1	1	1	0.908	1
1717	REACTOME_ROLE_OF_SECOND_MESSENGERS_IN_NETRIN1_SIGNALING	0.268	-	-	-	0.1	0.207	1	1	1	0.908	1
1718	CARBOHYDRATE_METABOLIC_PROCESS	0.268	-	-	-	0.3	0.207	1	1	1	0.909	1
1719	OKAMOTO_LIVER_CANCER_MULTICENTRIC_OCCURRENCE_DN	0.268	-	-	-	0.3	0.207	1	1	1	0.909	1
1720	TOMLINS_PROSTATE_CANCER_UP	0.268	-	-	-	0.3	0.207	1	1	1	0.909	1
1721	YGCGYRCGC_UNKNOWN	0.268	-	-	-	0.2	0.207	1	1	1	0.909	1
1722	RICKMAN_TUMOR_DIFFERENTIATED_MODERATELY_VS_POORLY_UP	0.268	-	-	-	0.3	0.208	1	1	1	0.909	1
1723	KIM_GERMINAL_CENTER_T_HELPER_DN	0.267	-	-	-	0.1	0.208	1	1	1	0.909	1
1724	EGUCHI_CELL_CYCLE_RB1_TARGETS	0.267	-	-	-	0.1	0.208	1	1	1	0.91	1
1725	PDZ_DOMAIN_BINDING	0.267	-	-	-	0.1	0.208	1	1	1	0.91	1
1726	REGULATION_OF_RNA_METABOLIC_PROCESS	0.267	-	-	-	0.1	0.208	1	1	1	0.91	1
1727	CONCANNON_APOPTOSIS_BY_EPOXOMICIN	0.267	-	-	-	0.3	0.208	1	1	1	0.91	1
1728	UNFOLDED_PROTEIN_BINDING	0.267	-	-	-	0.3	0.208	1	1	1	0.91	1
1729	RESPONSE_TO_HYPOXIA	0.267	-	-	-	0.2	0.208	1	1	1	0.91	1
1730	SCHRAMM_INHBA_TARGETS	0.267	-	-	-	0.4	0.209	1	1	1	0.911	1
1731	APPIERTO_RESPONSE_TO_FENRETINIDE	0.267	-	-	-	0.3	0.209	1	1	1	0.911	1
1732	V$GR_Q6_01	0.267	-	-	-	0.1	0.209	1	1	1	0.911	1
1733	SENGUPTA_EBNA1_ANTICORRELATED	0.267	-	-	-	0.3	0.209	1	1	1	0.911	1
1734	KEGG_ENDOCYTOSIS	0.267	-	-	-	0.2	0.209	1	1	1	0.912	1
1735	NAKAYAMA_SOFT_TISSUE_TUMORS_PCA1_DN	0.267	-	-	-	0.1	0.21	1	1	1	0.912	1
1736	OUILLETTE_CLL_13Q14_DELETION_DN	0.267	-	-	-	0.2	0.21	1	1	1	0.912	1
1737	BASAKI_YBX1_TARGETS_DN	0.267	-	-	-	0.3	0.21	1	1	1	0.912	1
1738	REACTOME_ACTIVATION_OF_THE_PRE_REPLICATIVE_COMPLEX	0.267	-	-	-	0.2	0.21	1	1	1	0.913	1
1739	KUNINGER_IGF1_VS_PDGFB_TARGETS	0.267	-	-	-	0.4	0.21	1	1	1	0.913	1
1740	PID_MTOR_4PATHWAY	0.267	-	-	-	0.3	0.21	1	1	1	0.913	1
1741	HYDROLASE_ACTIVITY_ACTING_ON_ACID_ANHYDRIDESCATALYZING_TRANSMEMBRANE_MOVEMENT_OF_SUBSTANCES	0.266	-	-	-	<0.1	0.21	1	1	1	0.913	1
1742	HO_LIVER_CANCER_VASCULAR_INVASION	0.266	-	-	-	0.3	0.21	1	1	1	0.913	1
1743	V$POU1F1_Q6	0.266	-	-	-	0.1	0.21	1	1	1	0.913	1
1744	SCHLOSSER_MYC_AND_SERUM_RESPONSE_SYNERGY	0.266	-	-	-	0.4	0.21	1	1	1	0.913	1
1745	RICKMAN_TUMOR_DIFFERENTIATED_MODERATELY_VS_POORLY	0.266	-	-	-	0.3	0.21	1	1	1	0.913	1
1746	INTRINSIC_TO_GOLGI_MEMBRANE	0.266	-	-	-	0.4	0.21	1	1	1	0.913	1
1747	WANG_BARRETTS_ESOPHAGUS	0.266	-	-	-	0.3	0.211	1	1	1	0.913	1
1748	CHEBOTAEV_GR_TARGETS	0.266	-	-	-	0.6	0.211	1	1	1	0.913	1
1749	FAELT_B_CLL_WITH_VH3_21_UP	0.266	-	-	-	0.1	0.211	1	1	1	0.913	1
1750	HYDROLASE_ACTIVITY_ACTING_ON_GLYCOSYL_BONDS	0.266	-	-	-	0.3	0.211	1	1	1	0.913	1
1751	GGCGGCA,MIR-371	0.266	-	-	-	<0.1	0.211	1	1	1	0.913	1
1752	TRANSCRIPTION_DNA_DEPENDENT	0.266	-	-	-	0.1	0.211	1	1	1	0.914	1
1753	BIOSYNTHETIC_PROCESS	0.266	-	-	-	0.5	0.211	1	1	1	0.914	1
1754	PID_PS1_PATHWAY	0.266	-	-	-	0.2	0.211	1	1	1	0.914	1
1755	KAUFFMANN_MELANOMA_RELAPSE_DN	0.266	-	-	-	0.1	0.211	1	1	1	0.914	1
1756	CEBALLOS_TARGETS_OF_TP53_AND_MYC_UP	0.266	-	-	-	0.1	0.212	1	1	1	0.914	1
1757	YTAAYNGCT_UNKNOWN	0.266	-	-	-	0.1	0.212	1	1	1	0.914	1
1758	GOZGIT_ESR1_TARGETS_DN	0.266	-	-	-	0.3	0.212	1	1	1	0.914	1
1759	ZHAN_MULTIPLE_MYELOMA_CD1_VS_CD2_DN	0.266	-	-	-	0.1	0.212	1	1	1	0.914	1
1760	REACTOME_TRAF6_MEDIATED_IRF7_ACTIVATION	0.265	-	-	-	0.2	0.212	1	1	1	0.915	1
1761	V$OCT_C	0.265	-	-	-	<0.1	0.213	1	1	1	0.915	1
1762	LI_CISPLATIN_RESISTANCE	0.265	-	-	-	0.2	0.213	1	1	1	0.916	1
1763	REACTOME_FATTY_ACYL_COA_BIOSYNTHESIS	0.265	-	-	-	0.3	0.213	1	1	1	0.916	1
1764	MORI_SMALL_PRE_BII_LYMPHOCYTE_UP	0.265	-	-	-	0.2	0.213	1	1	1	0.916	1
1765	V$AREB6_04	0.265	-	-	-	0.3	0.213	1	1	1	0.916	1
1766	SCHLOSSER_SERUM_RESPONSE	0.265	-	-	-	0.1	0.213	1	1	1	0.916	1
1767	REACTOME_TCA_CYCLE_AND_RESPIRATORY_ELECTRON_TRANSPORT	0.265	-	-	-	0.3	0.213	1	1	1	0.916	1
1768	WANG_RECURRENT_LIVER_CANCER_DN	0.265	-	-	-	0.4	0.214	1	1	1	0.916	1
1769	MIKKELSEN_MCV6_ICP_WITH_H3K27ME3	0.265	-	-	-	0.1	0.214	1	1	1	0.916	1
1770	ATPASE_ACTIVITY_COUPLED_TO_MOVEMENT_OF_SUBSTANCES	0.265	-	-	-	<0.1	0.214	1	1	1	0.916	1
1771	IVANOVA_HEMATOPOIESIS_INTERMEDIATE_PROGENITOR	0.265	-	-	-	0.4	0.214	1	1	1	0.917	1
1772	TIGHT_JUNCTION	0.265	-	-	-	0.1	0.214	1	1	1	0.917	1
1773	LINDGREN_BLADDER_CANCER_CLUSTER_3_UP	0.265	-	-	-	0.1	0.214	1	1	1	0.917	1
1774	BROWNE_HCMV_INFECTION_14HR_UP	0.265	-	-	-	0.3	0.214	1	1	1	0.917	1
1775	STEROID_BIOSYNTHETIC_PROCESS	0.265	-	-	-	0.1	0.214	1	1	1	0.917	1
1776	PRIMARY_ACTIVE_TRANSMEMBRANE_TRANSPORTER_ACTIVITY	0.265	-	-	-	<0.1	0.215	1	1	1	0.917	1
1777	PID_IL2_PI3K_PATHWAY	0.265	-	-	-	0.3	0.215	1	1	1	0.917	1
1778	ESTABLISHMENT_OF_VESICLE_LOCALIZATION	0.264	-	-	-	0.1	0.215	1	1	1	0.918	1
1779	FLECHNER_PBL_KIDNEY_TRANSPLANT_OK_VS_DONOR	0.264	-	-	-	0.1	0.215	1	1	1	0.918	1
1780	GTGGTGA,MIR-197	0.264	-	-	-	<0.1	0.215	1	1	1	0.918	1
1781	ZHOU_PANCREATIC_BETA_CELL	0.264	-	-	-	<0.1	0.215	1	1	1	0.918	1
1782	LANDIS_BREAST_CANCER_PROGRESSION_UP	0.264	-	-	-	0.2	0.216	1	1	1	0.918	1
1783	SHEN_SMARCA2_TARGETS_UP	0.264	-	-	-	0.1	0.216	1	1	1	0.918	1
1784	IVANOV_MUTATED_IN_COLON_CANCER	0.264	-	-	-	0.1	0.216	1	1	1	0.918	1
1785	GAMETE_GENERATION	0.264	-	-	-	0.1	0.216	1	1	1	0.918	1
1786	ACAACCT,MIR-453	0.264	-	-	-	0.5	0.216	1	1	1	0.918	1
1787	WORSCHECH_TUMOR_EVASION_AND_TOLEROGENICITY	0.264	-	-	-	0.2	0.217	1	1	1	0.919	1
1788	MAHADEVAN_RESPONSE_TO_MP470	0.264	-	-	-	0.2	0.217	1	1	1	0.919	1
1789	WIEMANN_TELOMERE_SHORTENING_AND_CHRONIC_LIVER_DAMAGE_DN	0.264	-	-	-	0.2	0.217	1	1	1	0.919	1
1790	PROTEIN_COMPLEX	0.264	-	-	-	0.1	0.217	1	1	1	0.92	1
1791	CHENG_IMPRINTED_BY_ESTRADIOL	0.264	-	-	-	<0.1	0.217	1	1	1	0.92	1
1792	INGRAM_SHH_TARGETS	0.263	-	-	-	0.1	0.218	1	1	1	0.92	1
1793	MRNA_BINDING	0.263	-	-	-	0.3	0.218	1	1	1	0.92	1
1794	NUCLEAR_BODY	0.263	-	-	-	0.1	0.218	1	1	1	0.92	1
1795	FAELT_B_CLL_WITH_VH3_21	0.263	-	-	-	0.3	0.218	1	1	1	0.92	1
1796	KIM_RESPONSE_TO_TSA_AND_DECITABINE_DN	0.263	-	-	-	0.2	0.218	1	1	1	0.92	1
1797	RNA_BIOSYNTHETIC_PROCESS	0.263	-	-	-	0.1	0.218	1	1	1	0.92	1
1798	GAGCCAG,MIR-149	0.263	-	-	-	0.1	0.218	1	1	1	0.92	1
1799	GAGACTG,MIR-452	0.263	-	-	-	<0.1	0.219	1	1	1	0.921	1
1800	LIPOPROTEIN_METABOLIC_PROCESS	0.263	-	-	-	0.3	0.219	1	1	1	0.921	1
1801	REICHERT_G1S_REGULATORS_AS_PI3K_TARGETS	0.263	-	-	-	0.2	0.219	1	1	1	0.921	1
1802	PROTEASOME_COMPLEX	0.263	-	-	-	0.3	0.219	1	1	1	0.921	1
1803	LI_ADIPOGENESIS_BY_ACTIVATED_PPARG	0.263	-	-	-	0.4	0.22	1	1	1	0.922	1
1804	NEGATIVE_REGULATION_OF_MAP_KINASE_ACTIVITY	0.262	-	-	-	0.2	0.22	1	1	1	0.922	1
1805	REACTOME_YAP1_AND_WWTR1_TAZ_STIMULATED_GENE_EXPRESSION	0.262	-	-	-	0.3	0.22	1	1	1	0.922	1
1806	HOFFMANN_LARGE_TO_SMALL_PRE_BII_LYMPHOCYTE_DN	0.262	-	-	-	0.4	0.22	1	1	1	0.923	1
1807	NABA_PROTEOGLYCANS	0.262	-	-	-	0.3	0.22	1	1	1	0.923	1
1808	KEGG_STARCH_AND_SUCROSE_METABOLISM	0.262	-	-	-	<0.1	0.22	1	1	1	0.923	1
1809	KEGG_VALINE_LEUCINE_AND_ISOLEUCINE_BIOSYNTHESIS	0.262	-	-	-	0.3	0.22	1	1	1	0.923	1
1810	REACTOME_KERATAN_SULFATE_BIOSYNTHESIS	0.262	-	-	-	0.2	0.22	1	1	1	0.923	1
1811	SHEN_SMARCA2_TARGETS	0.262	-	-	-	0.4	0.22	1	1	1	0.923	1
1812	GLUCAN_METABOLIC_PROCESS	0.262	-	-	-	0.4	0.22	1	1	1	0.923	1
1813	V$STAT3_02	0.262	-	-	-	0.1	0.221	1	1	1	0.923	1
1814	PHOSPHOLIPID_METABOLIC_PROCESS	0.262	-	-	-	0.3	0.221	1	1	1	0.923	1
1815	MEISSNER_BRAIN_HCP_WITH_H3K4ME2	0.262	-	-	-	<0.1	0.221	1	1	1	0.923	1
1816	HWANG_PROSTATE_CANCER_MARKERS	0.262	-	-	-	0.6	0.221	1	1	1	0.923	1
1817	REACTOME_METABOLISM_OF_PORPHYRINS	0.262	-	-	-	0.2	0.221	1	1	1	0.923	1
1818	KEGG_PROTEIN_EXPORT	0.262	-	-	-	0.5	0.221	1	1	1	0.923	1
1819	MITOCHONDRION	0.262	-	-	-	0.4	0.221	1	1	1	0.923	1
1820	FLOTHO_PEDIATRIC_ALL_THERAPY_RESPONSE_DN	0.262	-	-	-	0.2	0.222	1	1	1	0.924	1
1821	ACEVEDO_NORMAL_TISSUE_ADJACENT_TO_LIVER_TUMOR_DN	0.262	-	-	-	0.3	0.222	1	1	1	0.924	1
1822	AMINO_ACID_CATABOLIC_PROCESS	0.262	-	-	-	0.2	0.222	1	1	1	0.924	1
1823	HOLLEMAN_PREDNISOLONE_RESISTANCE_B_ALL_UP	0.262	-	-	-	0.1	0.222	1	1	1	0.924	1
1824	V$ATF_01	0.262	-	-	-	0.2	0.222	1	1	1	0.924	1
1825	DANG_REGULATED_BY_MYC	0.262	-	-	-	0.2	0.222	1	1	1	0.925	1
1826	PROTEIN_AMINO_ACID_N_LINKED_GLYCOSYLATION	0.261	-	-	-	0.3	0.222	1	1	1	0.925	1
1827	GOUYER_TUMOR_INVASIVENESS	0.261	-	-	-	0.1	0.223	1	1	1	0.925	1
1828	BERTUCCI_MEDULLARY_VS_DUCTAL_BREAST_CANCER	0.261	-	-	-	0.3	0.223	1	1	1	0.925	1
1829	REACTOME_PI3K_AKT_ACTIVATION	0.261	-	-	-	0.4	0.223	1	1	1	0.925	1
1830	BENPORATH_ES_2	0.261	-	-	-	0.3	0.223	1	1	1	0.926	1
1831	TOMIDA_LUNG_CANCER_POOR_SURVIVAL	0.261	-	-	-	0.3	0.223	1	1	1	0.926	1
1832	SCHAEFFER_PROSTATE_DEVELOPMENT_AND_CANCER_BOX5_UP	0.261	-	-	-	0.2	0.223	1	1	1	0.926	1
1833	REGULATION_OF_TRANSCRIPTIONDNA_DEPENDENT	0.261	-	-	-	0.2	0.223	1	1	1	0.926	1
1834	BIOCARTA_CARM1_PATHWAY	0.261	-	-	-	0.1	0.223	1	1	1	0.926	1
1835	SCHAEFFER_PROSTATE_DEVELOPMENT_48HR_UP	0.261	-	-	-	0.1	0.223	1	1	1	0.926	1
1836	V$FREAC3_01	0.261	-	-	-	0.1	0.224	1	1	1	0.926	1
1837	HALLMARK_ADIPOGENESIS	0.261	-	-	-	0.4	0.224	1	1	1	0.926	1
1838	V$PU1_Q6	0.261	-	-	-	<0.1	0.224	1	1	1	0.926	1
1839	SERVITJA_LIVER_HNF1A_TARGETS_DN	0.261	-	-	-	0.1	0.224	1	1	1	0.926	1
1840	CGTSACG_V$PAX3_B	0.261	-	-	-	0.2	0.224	1	1	1	0.926	1
1841	ATGAAGG,MIR-205	0.261	-	-	-	0.4	0.224	1	1	1	0.926	1
1842	REACTOME_NA_CL_DEPENDENT_NEUROTRANSMITTER_TRANSPORTERS	0.261	-	-	-	0.1	0.224	1	1	1	0.927	1
1843	SCIAN_INVERSED_TARGETS_OF_TP53_AND_TP73	0.261	-	-	-	0.2	0.224	1	1	1	0.927	1
1844	TRANSCRIPTION_FACTOR_BINDING	0.261	-	-	-	0.1	0.224	1	1	1	0.927	1
1845	V$CMYB_01	0.261	-	-	-	0.1	0.224	1	1	1	0.927	1
1846	STEIN_ESRRA_TARGETS	0.261	-	-	-	0.6	0.224	1	1	1	0.927	1
1847	V$E2F_Q6_01	0.261	-	-	-	0.2	0.224	1	1	1	0.927	1
1848	NUCLEAR_SPECK	0.261	-	-	-	0.4	0.225	1	1	1	0.927	1
1849	V$STAT6_01	0.26	-	-	-	0.1	0.225	1	1	1	0.927	1
1850	CHROMOSOME_ORGANIZATION_AND_BIOGENESIS	0.26	-	-	-	0.1	0.225	1	1	1	0.927	1
1851	ENERGY_RESERVE_METABOLIC_PROCESS	0.26	-	-	-	<0.1	0.225	1	1	1	0.928	1
1852	REGULATION_OF_TRANSCRIPTION	0.26	-	-	-	0.1	0.225	1	1	1	0.928	1
1853	MARCINIAK_ER_STRESS_RESPONSE_VIA_CHOP	0.26	-	-	-	0.1	0.225	1	1	1	0.928	1
1854	MEMBRANE_ORGANIZATION_AND_BIOGENESIS	0.26	-	-	-	0.4	0.225	1	1	1	0.928	1
1855	RNA_CATABOLIC_PROCESS	0.26	-	-	-	0.4	0.225	1	1	1	0.928	1
1856	ACGCACA,MIR-210	0.26	-	-	-	0.2	0.226	1	1	1	0.928	1
1857	FONTAINE_THYROID_TUMOR_UNCERTAIN_MALIGNANCY_UP	0.26	-	-	-	0.4	0.226	1	1	1	0.928	1
1858	CERAMIDE_METABOLIC_PROCESS	0.26	-	-	-	0.2	0.226	1	1	1	0.928	1
1859	REACTOME_SIGNALING_BY_NOTCH4	0.26	-	-	-	0.5	0.226	1	1	1	0.929	1
1860	REACTOME_TGF_BETA_RECEPTOR_SIGNALING_IN_EMT_EPITHELIAL_TO_MESENCHYMAL_TRANSITION	0.26	-	-	-	0.1	0.226	1	1	1	0.929	1
1861	BEIER_GLIOMA_STEM_CELL_UP	0.26	-	-	-	0.2	0.226	1	1	1	0.929	1
1862	PERINUCLEAR_REGION_OF_CYTOPLASM	0.26	-	-	-	0.3	0.226	1	1	1	0.929	1
1863	MOOTHA_VOXPHOS	0.26	-	-	-	0.2	0.227	1	1	1	0.929	1
1864	PID_SMAD2_3PATHWAY	0.26	-	-	-	0.3	0.227	1	1	1	0.929	1
1865	REACTOME_G1_S_SPECIFIC_TRANSCRIPTION	0.26	-	-	-	0.2	0.227	1	1	1	0.929	1
1866	RIZKI_TUMOR_INVASIVENESS_2D_DN	0.26	-	-	-	0.1	0.227	1	1	1	0.929	1
1867	KEGG_HOMOLOGOUS_RECOMBINATION	0.26	-	-	-	0.2	0.227	1	1	1	0.929	1
1868	PROTEIN_C_TERMINUS_BINDING	0.26	-	-	-	0.2	0.227	1	1	1	0.929	1
1869	V$GCM_Q2	0.26	-	-	-	<0.1	0.227	1	1	1	0.929	1
1870	BIOCARTA_P27_PATHWAY	0.259	-	-	-	0.2	0.227	1	1	1	0.929	1
1871	MARKS_HDAC_TARGETS	0.259	-	-	-	0.1	0.227	1	1	1	0.929	1
1872	YOSHIMURA_MAPK8_TARGETS_DN	0.259	-	-	-	0.4	0.227	1	1	1	0.929	1
1873	ACACTAC,MIR-142-3P	0.259	-	-	-	0.2	0.227	1	1	1	0.929	1
1874	ESC_J1_UP_EARLY.V1_UP	0.259	-	-	-	0.1	0.228	1	1	1	0.929	1
1875	NEGATIVE_REGULATION_OF_TRANSPORT	0.259	-	-	-	0.1	0.228	1	1	1	0.929	1
1876	SCHAEFFER_PROSTATE_DEVELOPMENT_12HR	0.259	-	-	-	0.1	0.228	1	1	1	0.93	1
1877	APICAL_PLASMA_MEMBRANE	0.259	-	-	-	0.3	0.228	1	1	1	0.93	1
1878	PEDRIOLI_MIR31_TARGETS	0.259	-	-	-	0.2	0.228	1	1	1	0.93	1
1879	REGULATION_OF_ANATOMICAL_STRUCTURE_MORPHOGENESIS	0.259	-	-	-	0.2	0.229	1	1	1	0.93	1
1880	KEGG_GLYCOSAMINOGLYCAN_BIOSYNTHESIS_HEPARAN_SULFATE	0.259	-	-	-	0.2	0.229	1	1	1	0.93	1
1881	MOREAUX_MULTIPLE_MYELOMA_BY_TACI_UP	0.259	-	-	-	0.1	0.229	1	1	1	0.93	1
1882	JOSEPH_RESPONSE_TO_SODIUM_BUTYRATE	0.259	-	-	-	0.2	0.229	1	1	1	0.931	1
1883	TRANSCRIPTION_FROM_RNA_POLYMERASE_III_PROMOTER	0.259	-	-	-	0.5	0.229	1	1	1	0.931	1
1884	ROESSLER_LIVER_CANCER_METASTASIS_UP	0.259	-	-	-	0.2	0.229	1	1	1	0.931	1
1885	VOLTAGE_GATED_CHANNEL_ACTIVITY	0.259	-	-	-	<0.1	0.229	1	1	1	0.931	1
1886	V$GR_01	0.259	-	-	-	0.1	0.229	1	1	1	0.931	1
1887	CHROMATIN_REMODELING_COMPLEX	0.259	-	-	-	<0.1	0.229	1	1	1	0.931	1
1888	TRANSFERASE_ACTIVITY_TRANSFERRING_ACYL_GROUPS	0.259	-	-	-	0.2	0.229	1	1	1	0.931	1
1889	FUKUSHIMA_TNFSF11_TARGETS	0.258	-	-	-	0.2	0.229	1	1	1	0.931	1
1890	V$USF_01	0.258	-	-	-	0.3	0.229	1	1	1	0.931	1
1891	OHGUCHI_LIVER_HNF4A_TARGETS_UP	0.258	-	-	-	0.4	0.23	1	1	1	0.931	1
1892	ACTIN_CYTOSKELETON_ORGANIZATION_AND_BIOGENESIS	0.258	-	-	-	0.2	0.23	1	1	1	0.931	1
1893	REPLICATION_FORK	0.258	-	-	-	0.1	0.23	1	1	1	0.931	1
1894	GAZDA_DIAMOND_BLACKFAN_ANEMIA_ERYTHROID_DN	0.258	-	-	-	0.2	0.23	1	1	1	0.931	1
1895	MAINTENANCE_OF_CELLULAR_PROTEIN_LOCALIZATION	0.258	-	-	-	0.1	0.23	1	1	1	0.931	1
1896	LAU_APOPTOSIS_CDKN2A	0.258	-	-	-	0.1	0.23	1	1	1	0.931	1
1897	SILIGAN_TARGETS_OF_EWS_FLI1_FUSION_DN	0.258	-	-	-	0.1	0.23	1	1	1	0.931	1
1898	CELLULAR_CARBOHYDRATE_METABOLIC_PROCESS	0.258	-	-	-	0.3	0.23	1	1	1	0.932	1
1899	JEON_SMAD6_TARGETS_DN	0.258	-	-	-	0.3	0.23	1	1	1	0.932	1
1900	CRX_NRL_DN.V1_UP (19q13.3)	0.258	-	-	-	0.3	0.23	1	1	1	0.932	1
1901	GAVIN_IL2_RESPONSIVE_FOXP3_TARGETS	0.258	-	-	-	0.3	0.23	1	1	1	0.932	1
1902	DING_LUNG_CANCER_MUTATED_SIGNIFICANTLY	0.258	-	-	-	0.4	0.231	1	1	1	0.932	1
1903	DIAZ_CHRONIC_MEYLOGENOUS_LEUKEMIA	0.258	-	-	-	0.4	0.231	1	1	1	0.933	1
1904	KEGG_ALANINE_ASPARTATE_AND_GLUTAMATE_METABOLISM	0.258	-	-	-	0.2	0.231	1	1	1	0.933	1
1905	REACTOME_ADENYLATE_CYCLASE_INHIBITORY_PATHWAY	0.258	-	-	-	0.3	0.231	1	1	1	0.933	1
1906	REACTOME_GROWTH_HORMONE_RECEPTOR_SIGNALING	0.258	-	-	-	0.3	0.231	1	1	1	0.933	1
1907	VALK_AML_CLUSTER_1	0.258	-	-	-	0.6	0.231	1	1	1	0.933	1
1908	CHANGOLKAR_H2AFY_TARGETS_UP	0.257	-	-	-	0.2	0.232	1	1	1	0.933	1
1909	PROTEIN_AUTOPROCESSING	0.257	-	-	-	0.1	0.232	1	1	1	0.934	1
1910	REACTOME_CROSS_PRESENTATION_OF_SOLUBLE_EXOGENOUS_ANTIGENS_ENDOSOMES	0.257	-	-	-	0.4	0.232	1	1	1	0.934	1
1911	MYOSIN_COMPLEX	0.257	-	-	-	0.2	0.232	1	1	1	0.934	1
1912	PID_ERBB2_ERBB3_PATHWAY	0.257	-	-	-	0.2	0.232	1	1	1	0.934	1
1913	KEGG_PANTOTHENATE_AND_COA_BIOSYNTHESIS	0.257	-	-	-	0.4	0.233	1	1	1	0.934	1
1914	SMID_BREAST_CANCER_NORMAL_LIKE_DN	0.257	-	-	-	0.3	0.233	1	1	1	0.934	1
1915	CHEMELLO_SOLEUS_VS_EDL_MYOFIBERS_DN	0.257	-	-	-	<0.1	0.233	1	1	1	0.934	1
1916	KRAS.600_UP.V1_DN (12p12.1)	0.257	-	-	-	0.1	0.233	1	1	1	0.934	1
1917	ATPASE_ACTIVITY_COUPLED	0.257	-	-	-	0.1	0.233	1	1	1	0.934	1
1918	MIKKELSEN_IPS_WITH_HCP_H3K27ME3	0.257	-	-	-	0.2	0.233	1	1	1	0.935	1
1919	KEGG_GLYCEROLIPID_METABOLISM	0.257	-	-	-	0.4	0.234	1	1	1	0.935	1
1920	ACTIN_FILAMENT_BINDING	0.257	-	-	-	0.3	0.234	1	1	1	0.935	1
1921	PID_FAS_PATHWAY	0.256	-	-	-	0.3	0.234	1	1	1	0.935	1
1922	ONDER_CDH1_TARGETS_3	0.256	-	-	-	0.1	0.234	1	1	1	0.935	1
1923	TIEN_INTESTINE_PROBIOTICS_24HR_UP	0.256	-	-	-	0.2	0.234	1	1	1	0.935	1
1924	LU_TUMOR_VASCULATURE_DN	0.256	-	-	-	0.1	0.235	1	1	1	0.935	1
1925	REACTOME_POL_SWITCHING	0.256	-	-	-	0.1	0.235	1	1	1	0.935	1
1926	ACTGTAG,MIR-139	0.256	-	-	-	0.3	0.235	1	1	1	0.935	1
1927	YRCCAKNNGNCGC_UNKNOWN	0.256	-	-	-	0.3	0.235	1	1	1	0.935	1
1928	KUMAR_PATHOGEN_LOAD_BY_MACROPHAGES	0.256	-	-	-	0.1	0.235	1	1	1	0.935	1
1929	RUAN_RESPONSE_TO_TROGLITAZONE_UP	0.256	-	-	-	0.4	0.235	1	1	1	0.936	1
1930	TISSUE_MORPHOGENESIS	0.256	-	-	-	0.1	0.235	1	1	1	0.936	1
1931	MORI_PLASMA_CELL_UP	0.256	-	-	-	0.4	0.235	1	1	1	0.936	1
1932	HOLLEMAN_PREDNISOLONE_RESISTANCE_ALL	0.256	-	-	-	0.2	0.235	1	1	1	0.936	1
1933	MYLLYKANGAS_AMPLIFICATION_HOT_SPOT_6	0.256	-	-	-	0.2	0.236	1	1	1	0.936	1
1934	SUGAR_BINDING	0.256	-	-	-	0.1	0.236	1	1	1	0.936	1
1935	NEGATIVE_REGULATION_OF_PHOSPHORYLATION	0.256	-	-	-	0.2	0.236	1	1	1	0.936	1
1936	REACTOME_CELL_CYCLE_MITOTIC	0.256	-	-	-	0.1	0.236	1	1	1	0.936	1
1937	FATTY_ACID_METABOLIC_PROCESS	0.256	-	-	-	0.2	0.236	1	1	1	0.936	1
1938	KOBAYASHI_EGFR_SIGNALING_24HR	0.256	-	-	-	0.1	0.236	1	1	1	0.936	1
1939	LIGASE_ACTIVITY_FORMING_CARBON_OXYGEN_BONDS	0.256	-	-	-	0.4	0.236	1	1	1	0.936	1
1940	ZHAN_MULTIPLE_MYELOMA_LB_UP	0.256	-	-	-	0.2	0.236	1	1	1	0.936	1
1941	JAEGER_METASTASIS_UP	0.255	-	-	-	0.6	0.237	1	1	1	0.936	1
1942	ZHAN_MULTIPLE_MYELOMA_SUBGROUPS	0.255	-	-	-	0.3	0.237	1	1	1	0.937	1
1943	V$SOX5_01	0.255	-	-	-	0.1	0.237	1	1	1	0.937	1
1944	NOTCH_SIGNALING_PATHWAY	0.255	-	-	-	<0.1	0.237	1	1	1	0.937	1
1945	V$GATA1_01	0.255	-	-	-	0.1	0.237	1	1	1	0.937	1
1946	REGULATION_OF_CELLULAR_COMPONENT_ORGANIZATION_AND_BIOGENESIS	0.255	-	-	-	0.3	0.237	1	1	1	0.937	1
1947	BAE_BRCA1_TARGETS_UP	0.255	-	-	-	0.3	0.238	1	1	1	0.937	1
1948	NUCLEAR_CHROMOSOME_PART	0.255	-	-	-	0.2	0.238	1	1	1	0.937	1
1949	NEGATIVE_REGULATION_OF_PHOSPHATE_METABOLIC_PROCESS	0.255	-	-	-	0.2	0.238	1	1	1	0.937	1
1950	SUMI_HNF4A_TARGETS	0.255	-	-	-	0.3	0.238	1	1	1	0.937	1
1951	INTRACELLULAR_ORGANELLE_PART	0.255	-	-	-	0.2	0.238	1	1	1	0.937	1
1952	PASQUALUCCI_LYMPHOMA_BY_GC_STAGE	0.255	-	-	-	0.5	0.238	1	1	1	0.938	1
1953	PALOMERO_GSI_SENSITIVITY	0.255	-	-	-	0.2	0.238	1	1	1	0.938	1
1954	CAIRO_LIVER_DEVELOPMENT_DN	0.255	-	-	-	0.4	0.239	1	1	1	0.938	1
1955	V$GATA6_01	0.255	-	-	-	0.2	0.239	1	1	1	0.938	1
1956	CACGTG_V$MYC_Q2	0.255	-	-	-	0.3	0.239	1	1	1	0.938	1
1957	ATPASE_ACTIVITY	0.255	-	-	-	0.4	0.239	1	1	1	0.938	1
1958	V$MAX_01	0.254	-	-	-	0.1	0.239	1	1	1	0.938	1
1959	LEE_BMP2_TARGETS_UP	0.254	-	-	-	0.1	0.24	1	1	1	0.938	1
1960	MATZUK_SPERMATOGONIA	0.254	-	-	-	0.1	0.24	1	1	1	0.939	1
1961	CORTICAL_ACTIN_CYTOSKELETON	0.254	-	-	-	0.2	0.24	1	1	1	0.939	1
1962	WANG_PROSTATE_CANCER_ANDROGEN_INDEPENDENT	0.254	-	-	-	0.1	0.24	1	1	1	0.939	1
1963	REACTOME_KERATAN_SULFATE_KERATIN_METABOLISM	0.254	-	-	-	0.3	0.24	1	1	1	0.939	1
1964	PROTEIN_SERINE_THREONINE_PHOSPHATASE_ACTIVITY	0.254	-	-	-	0.2	0.241	1	1	1	0.939	1
1965	V$E2F1_Q6	0.254	-	-	-	0.2	0.241	1	1	1	0.939	1
1966	V$FOX_Q2	0.254	-	-	-	0.2	0.241	1	1	1	0.939	1
1967	RICKMAN_TUMOR_DIFFERENTIATED_MODERATELY_VS_POORLY_DN	0.254	-	-	-	0.3	0.241	1	1	1	0.939	1
1968	V$MEIS1BHOXA9_01	0.254	-	-	-	<0.1	0.241	1	1	1	0.939	1
1969	TGGTGCT,MIR-29A,MIR-29B,MIR-29C	0.254	-	-	-	0.1	0.241	1	1	1	0.939	1
1970	REGULATION_OF_NUCLEOBASENUCLEOSIDENUCLEOTIDE_AND_NUCLEIC_ACID_METABOLIC_PROCESS	0.254	-	-	-	0.1	0.241	1	1	1	0.939	1
1971	KINASE_ACTIVITY	0.254	-	-	-	0.5	0.241	1	1	1	0.939	1
1972	E2F3_UP.V1_UP (6p22)	0.254	-	-	-	0.1	0.241	1	1	1	0.939	1
1973	DEBIASI_APOPTOSIS_BY_REOVIRUS_INFECTION_DN	0.253	-	-	-	0.2	0.242	1	1	1	0.94	1
1974	HAHTOLA_SEZARY_SYNDROM_DN	0.253	-	-	-	0.2	0.242	1	1	1	0.94	1
1975	BARRIER_CANCER_RELAPSE_NORMAL_SAMPLE_DN	0.253	-	-	-	0.1	0.242	1	1	1	0.94	1
1976	REACTOME_ACTIVATED_TAK1_MEDIATES_P38_MAPK_ACTIVATION	0.253	-	-	-	0.2	0.242	1	1	1	0.94	1
1977	TRANSCRIPTION_FROM_RNA_POLYMERASE_II_PROMOTER	0.253	-	-	-	0.1	0.242	1	1	1	0.94	1
1978	SMID_BREAST_CANCER_RELAPSE_IN_LIVER	0.253	-	-	-	0.2	0.242	1	1	1	0.94	1
1979	PYEON_CANCER_HEAD_AND_NECK_VS_CERVICAL	0.253	-	-	-	0.3	0.243	1	1	1	0.94	1
1980	BAKKER_FOXO3_TARGETS_DN	0.253	-	-	-	0.1	0.243	1	1	1	0.94	1
1981	LEE_LIVER_CANCER	0.253	-	-	-	0.4	0.243	1	1	1	0.94	1
1982	ORGANELLE_PART	0.253	-	-	-	0.2	0.243	1	1	1	0.94	1
1983	BOYAULT_LIVER_CANCER_SUBCLASS_G123_UP	0.253	-	-	-	0.2	0.243	1	1	1	0.94	1
1984	STOSSI_RESPONSE_TO_ESTRADIOL	0.253	-	-	-	0.4	0.244	1	1	1	0.941	1
1985	ONE_CARBON_COMPOUND_METABOLIC_PROCESS	0.253	-	-	-	0.2	0.244	1	1	1	0.941	1
1986	BIOCARTA_BIOPEPTIDES_PATHWAY	0.253	-	-	-	0.4	0.244	1	1	1	0.941	1
1987	SCHURINGA_STAT5A_TARGETS	0.253	-	-	-	0.4	0.244	1	1	1	0.941	1
1988	WANG_TNF_TARGETS	0.253	-	-	-	0.3	0.244	1	1	1	0.941	1
1989	V$AP3_Q6	0.253	-	-	-	0.3	0.244	1	1	1	0.941	1
1990	TRANSCRIPTION_FACTOR_COMPLEX	0.253	-	-	-	0.2	0.244	1	1	1	0.941	1
1991	CHAPERONE_BINDING	0.253	-	-	-	<0.1	0.244	1	1	1	0.941	1
1992	MEIOTIC_RECOMBINATION	0.253	-	-	-	0.4	0.244	1	1	1	0.941	1
1993	REACTOME_PROLONGED_ERK_ACTIVATION_EVENTS	0.253	-	-	-	0.3	0.244	1	1	1	0.941	1
1994	HEIDENBLAD_AMPLIFIED_IN_PANCREATIC_CANCER	0.252	-	-	-	0.3	0.245	1	1	1	0.942	1
1995	IWANAGA_CARCINOGENESIS_BY_KRAS	0.252	-	-	-	0.2	0.245	1	1	1	0.942	1
1996	IWANAGA_CARCINOGENESIS_BY_KRAS_PTEN	0.252	-	-	-	0.4	0.245	1	1	1	0.942	1
1997	MCBRYAN_PUBERTAL_BREAST_3_4WK	0.252	-	-	-	0.2	0.245	1	1	1	0.942	1
1998	HERNANDEZ_MITOTIC_ARREST_BY_DOCETAXEL_2_DN	0.252	-	-	-	0.3	0.245	1	1	1	0.942	1
[truncated: 6,417 more rows]
